# Supplementary material for: When disturbances favour species adapted to stressful soils: grazing may benefit soil specialists in gypsum plant communities
Source: PeerJ journal article supplement (doi:10.7717/peerj.14222), 2022-10-12
Supplement: data_paper_AndreuCera.xlsx [file data_paper_AndreuCera.xlsx]

## Sheet: vegetation_data
locality	grazing	plot	ID	AllSph	ArtHer	AspAri	AspFis	AstAlo	AstInc	AstMon	AtrHum	aveBro	BraRet	BroEre	CarTen	CenAsp	ConArv	CorMon	CreVes	DacGlo	DipSer	EchRit	GenSco	GypStr	HedBov	HelMar	HelSqu	HelSyr	HelVio	HelSto	HerFru	KoeVal	LauFra	LauPum	LinSuf	LygSpa	MatFru	OnoTri	OnoCf	OroCer	PlaAlb	PoaBul	PolRup	ResStr	RosOff	SalVer	SedSed	SidFru	SonTen
Hoyo	High	1	H_H_01	0	0	0	0	0	0	0	0	0	0.8	0	0	0	0	0	0	0	0	0	3	6	0	0	1.5	0.2	0	1	0.8	0.8	0	0	2.5	0	0	0	0	0	0	0	0	0	0	0	0	0.2	0
Hoyo	High	2	H_H_02	0	0	0	0	0	0	0	0	0	2.5	0	0	0	0	0	0	0	0	0	2	0	0	0	1	1.5	0	1	0.8	2.5	0	0	2	0	0	0	0	0	0	0	0	0	0	0	0	0.8	0
Hoyo	High	3	H_H_03	0	0	0	0	0	0	0	0	0.2	2.5	0	0	0	0	0	0	0	0	0	2	0	0	0	2	0.8	0	1	1	0.8	0	0	2	0	0	3	0	0	0	0	0	0.5	0	0	0	0.8	0
Hoyo	High	4	H_H_04	0	0	0	0	0	0	0	0	0	0.5	0	0	0	0	0	0	0	0	0	2	2	0	0	3	0.8	0	0.1	0.2	0	0	0	0.8	0	0	0	0	0	0	0	0	0	0	0	0	0	0
Hoyo	High	5	H_H_05	0	0	0	0	0	0	0	0	0	3.5	0	0	0	0	0	0	0	0	0	0.5	1	0	0	2	0.8	0	1	0.5	1.5	0	0.3	1	0	0	0.1	0	0	0	0	0	0	0	0	0	0	0
Hoyo	High	6	H_H_06	0	0	0	0	0	0	0	0	0	0.5	0	0	0	0	0	0	0	0	0	3	0	0	0	0.8	1	0	1	0.5	1	0	0	2	0	0	5	0	0	0	0	0	0.5	0	0	0	0.3	0
Hoyo	High	7	H_H_07	0	0	0	0	0	0	0	0	0	0	0	0	0	0	0	0	0	0	0	0	0	0	0	0.3	0.8	0	1	0.8	0.5	0	0	4.5	0	0	0	0	0	0	0	0	0	0	0	0	0	0
Hoyo	High	8	H_H_08	0	0	0	0	0	0	0	0	0	12	0	0	0	0	0	0	0	0	0	0	0	0	0	1.5	1.5	0	1.5	2	2	0	0.2	1	0	0	0	0	0	0	0	0	0	0	0	0	0.3	0
Hoyo	High	9	H_H_09	0	0	0	0	0	0	0	0	0.5	4	0	0	0	0	0	0	0.2	0	0	2	8	0	0	4	1	0	1	1.5	0.8	0.2	0.2	3.5	0	0	0	0	0	0	0	0	0	0	0	0	6	0
Hoyo	High	10	H_H_10	0	0	0	0	0	0	0	0	0	3	0	0	0	0	0	0	0	0	0	0	12	0	0	3	0.5	0	1	2	1	0	0	0.8	0	0	0	0	0	3	0	0	1	0	0	0	3	0
Hoyo	High	11	H_H_11	0	0	0	0	0	0	0	0	0	2	0	0	0	0	0	0	0	0	0	0	2	0	0	2	1	0	1.5	2	1	0.2	0.2	0	0	0	0	0	0	1.5	0	0	0	0	0	0	2.5	0
Hoyo	High	12	H_H_12	0	0	0	0	0	0	0	0	0	4	0	0	0	0	0	0	0	0	0	0	0	0	0	1	1.5	0	1.5	1.5	1.5	0	0.5	3.5	0	0	0	0	0	0	0	0	0	0	0	0	3	0
Hoyo	High	13	H_H_13	0	0	0	0	0	0	0	0	0	0	0	0	0	0	0	0	0	0	0	0	2.5	0	0	4	0	0	1	3	0.8	0	0	0	4	0	0	0	0	2	0	0	0	0	0	0	0.8	0
Hoyo	High	14	H_H_14	0	0	0	0	0	0	0	0	0	12	0	0	0	0	0	0	0	0	0	0	0	0	0	5	0.4	0	0.3	4	0	0.8	0.2	1.5	0	0	0	0	0	1.5	0	0	0	0	0	0	2	0
Hoyo	High	15	H_H_15	0	0	0	0	0	0	0	0	0	4	0	0	0	0	0	0	0	0	0	0	5	0	0	3.5	0.6	0	0.5	1	0.8	0.5	0	0.4	0	0	0	0	0	3	0	0	0	0	0	0	2.5	0
Hoyo	High	16	H_H_16	0	0.1	0	0	0	0	0	0	0	0	0	0	0	0	0	0	0	0.1	0	0	0.5	0	0	5	0.4	0	0	1.5	1	0	0	0.5	0	0	0	0	0	12	0	0	0	0	0	0	0.8	0
Hoyo	High	17	H_H_17	0	0	0.3	0	0	0	0	0	0	1.5	0	0	0	0	0	0	0	0	0.3	0	0.4	0	0	4	0.5	0	1	2	2	0	0.3	0.3	0	0	0	0	0	2.5	0	0	0	0	0	0	1.5	0
Hoyo	High	18	H_H_18	0	0	0	0	0	0	0	0	0	10	0	0	0	0	0	0	0	0	0	0	0.5	0	0	5	0.8	0	0.8	2	1.5	1	0	0	0	0	0	0	0	2	0	0	0	0	0	0	2	0
Hoyo	High	19	H_H_19	0	0	0	0	0	0	0	0	0	0	0	0	0	0	0	0	0	0	0.5	0	0	0	0	3	0.8	0	0.8	1	1	0	0	0	0	0	0	0	0	0.8	0	0	0	0	0	0	3	0
Hoyo	High	20	H_H_20	0	0	0	0	0	0	0	0	0	1	0	0	0	0	0	0	0	0	0	0	0	0	0	0.5	0.8	0	0.7	1	0.8	0	0	0	0	0	0	0	0	0.8	0	0	0	0	0	0	1.5	0
Hoyo	High	21	H_H_21	0	0	0	0	0	0	0	0	0	0	0	0	0	0	0	0	0	0	0	0	0	0	0	4	2	0	1.5	4	1.5	0	0	3.5	0	0	2	0	0	2.5	0	0	0	0	0	0	0.7	0
Hoyo	High	22	H_H_22	0	0	0	0	0	0	0	0	0	1.5	0	0	0	0	0	0	0	0	0	0	12	0	0	12	0.5	0	0.5	3	0	1	0	0.2	3.5	0	0	0	0	3	0	0	0	0	0	0	10	0
Hoyo	High	23	H_H_23	0	0	0	0	0	0	0	0	0	0	0	0	0	0	0	0	0	0	0	0	0	0	0	1	0.2	0	1	0.5	0	0	0	0.5	0	0	0	0	0	0.2	0	0	0	0	0	0	0	0
Hoyo	High	24	H_H_24	0	0	0	0	0	0	0	0	0	0	0	0	0	0	0	0	0	0	0	0	0	0	0	2	0.5	0	1.5	1	0	0	0	0	0	0	4	0	0	1.5	0	0	0	0	0	0	0	0
Hoyo	High	25	H_H_25	0	0	0	0	0	0	0	0	0	4.5	0	0	0	0	0	0	0	0	0	0.3	6	0	0	3	1	0	2	1.5	1.5	0	0.8	2	0	0	0	0	0	0.5	0	0	0	0	0	0	0.5	0.1
Hoyo	High	26	H_H_26	0	0	0	0	0	0	0	0.2	0	8	0	0	0	0	0	0	0	0	0	0	0	0	0	5	1	0	2	2	1	0	0.2	1	1.5	0	0	0	0	1	0	0	0	0	0	0	1.5	0
Hoyo	High	27	H_H_27	0	0	0.5	0	0	0	0	0	0	4	0	0	0	0	0	0	0	0	0	0	0	0	0	4	1.5	0	2	2	2.5	0	0.8	0.5	0	0	0	0	0	2.5	0	0	0	0	0	0	1	0
Hoyo	High	28	H_H_28	0	0	0	0	0	0	0	0	0	0	0	0	0	0	0	0	0	0.5	0	0	0	0	0	4	1	0	2	1.5	1.5	0	0.5	5	0	0	0	0	0	0	0	0	0	0	0	0.5	0	0
Hoyo	High	29	H_H_29	0	0	2	0	0	0	0	0	0.2	3.5	0	0	0	0	0	0.3	0	0	0	2	0	0	0	8	1	0	0.8	2	1	0	0.3	1	0	0	3	0	0	8	0	0.3	0	0	0	0	2	0
Hoyo	High	30	H_H_30	0	0	0	0	0	0	0	0	0	1	0	0	0	0	0	0	0	0	0	4	0.5	0	1	2	1.5	0	0.5	1	1.5	0	0	1.5	0	0	0	0	0	0.5	0	0.2	0.8	0	0	0	0.7	0
Hoyo	High	31	H_H_31	0	0	0	0	0	0	0	0	0	0.8	0	0	0	0	0	0	0	0	0	0.5	0	0	0	2.5	1.5	0	0.8	1.5	1	0	0	1	0	0	0	0	0	3	0	0	0	0	0	0	1	0
Hoyo	High	32	H_H_32	0	0	0	0	0	0	0	0	0	0	0	0	0	0	0	0	0	0	0	0	6	0	0	1	1	0	1	1	1	0	0	1	0	0	0	0	0	0	0	0	0	0	0	0	1	0
Hoyo	High	33	H_H_33	0	0	0	0	0	0	0	0	0	1	0	0	0	0	0	0	0	0	0	0.8	0	0	0	2	0.8	0	1	1.5	2	0	0.3	2	0	0	5	0	0	1.5	0	0	0	0	0	0	1.2	0
Hoyo	High	34	H_H_34	0	0	0	0	0	0	0	0	0	1.2	0	0	0	0	0	0	0	0	0	0.3	0	0	0	0.3	1	0	1	0.8	1.5	0	0.2	2.5	0	0	0	0	0	0	0	0	0.2	0	0	0	0.5	0
Hoyo	High	35	H_H_35	0	1	0	0	0	0	0	0	0	10	0	0	0	0.2	0	0	0	0	0	0	3	0	0	10	1	0	1.5	1.5	0.8	0.5	0.5	0	0	0	0	0	0	0.8	0	0	0	0	0	0	1	0.2
Hoyo	Medium	1	H_M_01	0	0	0	0	0	0	0	0.8	0	0	0	0	0	0	0	0	0	0	0	0	0	0	0	2	1	0	1.5	1	0.3	0	0	0.8	0	0	8	0	0	0.8	0	0	0	0	0	0	0.8	0
Hoyo	Medium	2	H_M_02	0	0	0	0	0	0	0	0.5	0	2	0	0	0	0	0	0	0	0	0	0	15	0	0	2.5	1.5	0	0	1	1.5	0	0	0.5	4	0	0	0	0	3	0	0	0	0	0	0	0.8	0
Hoyo	Medium	3	H_M_03	0	0	0	0	0	0	0	0.5	0	5	0	0	0	0	0	0	0	0	0	1	3	0	0	4	1.5	0	0	3	2	0	0	0.5	1.5	0	0	0	0	4	0	0	0	0	0	0	1.2	0
Hoyo	Medium	4	H_M_04	0	4	0	0	0	0	0	0	0	1.5	0	0	0	0	0	0	1	0	0	0	10	0	0	10	0	0	0	1	2	0	0	0	0	0	0	0	0	8	0	0	0	0	0	0	0.3	0
Hoyo	Medium	5	H_M_05	0	0	0	0	0	0	0	1	0	5	0	0	0	0	0	0	0.8	0	0	0	5	0	0	2.5	1.5	0.3	0.5	2	0.5	0	0	0	0	0	6	0	0	4	0	0	0	0	0.2	0	1.5	0
Hoyo	Medium	6	H_M_06	0	0	0	0	0	0	0	0	0	0.8	0	0	0	0	0	0	0.8	0	0	0	0	0	0	2	1	0.3	0.5	2.5	1	0	0.2	0	10	0	5	0	0	2	0	0	0	0	0	0	0	0
Hoyo	Medium	7	H_M_07	0	0	0	0	0	0	0	0	0	0	0	0	0	0	0	0	0	0	0	3	0	0	0	2.5	0.5	0.3	1.2	1	1	0	0	3	0	0	0	0	0	0	0	0	0	0	0	0	0	0
Hoyo	Medium	8	H_M_08	0	0	1	0	0	0	0	1.5	0	7	0	0	0	0	0	0	0	0.2	1	0.8	0	0	0	1	1.5	1	0.8	1	1.5	0.5	0.8	1	0	0	0	0	0	1	0	0	0	0	0	0	1.5	0
Hoyo	Medium	9	H_M_09	0	0	1	0	0	0	0	0.2	0.3	4	0	0	0	0	0	0	0.5	0	0.8	6	1.5	0	0	2.5	1.5	1	1	0.5	0.8	0	0	10	0	0	20	0	0	0	0	0	0	0	0	0	0	0
Hoyo	Medium	10	H_M_10	0	0	0	0.5	0	0	0	0.5	0	4	0	0	0	0	0	0	0	0	0	0	0.1	0	0	2	1	1.5	1	0	0.8	0	0	0	0	0	0	0	0	4	0	0	0	0	0	0.2	1.5	0
Hoyo	Medium	11	H_M_11	0	0	0	0	0	0	0	0	0	5	0	0	0	0	0	0	1	0	0.4	8	50	0	0	0	0	2	1.5	0	0.8	0	0	0	0	0	10	0	0	0	0	0	0	0	0	0	2	0
Hoyo	Medium	12	H_M_12	0	0	0.4	0	0	0	0	0	0	4	0	0	0	0	0	0	0	0	1	0	1	0	0	3.5	0	0.4	0	0.5	0.5	0.5	0	1	0	0	0	0	0	1.5	0	0	0	0	0	0.2	0.8	0
Hoyo	Medium	13	H_M_13	0	0	0	0	0	0	0	0	0	3	0	0	0	0	0	0	0	0	2	0	0	0	0	5	0	0	0.5	1	0.4	0.5	0	0.4	0	0	0	0	0	2.5	0	0	0	0	0	0	0.5	0
Hoyo	Medium	14	H_M_14	0	0	0	0	0	0	0	0	0	0	0	0	0	0	0	0	0	0	0.3	0	2	0	0	2	0.8	0	0.2	0.5	1	1.5	0	0	0	0	0	0	0	2	0	0	0	0	0	0	0.5	0
Hoyo	Medium	15	H_M_15	0	0	0	0	0	0	0	0	0	0.5	0	0	0	0	0	0	0.2	0	0	6	0.2	0	0	1.5	2	2	0	1	1.5	0	0	0.8	0	0	0	0	0	3	0	0	0	0	0	0	2	0
Hoyo	Medium	16	H_M_16	0	4	2	0	0	0	0	0	0	0	0	0	0	0	0	0	0	0	0	0	25	0	0	1.5	1	0.5	0	0	0	0	0	0	0	0	15	0	0	4	0	0	0	0	0	0	0	1
Hoyo	Medium	17	H_M_17	0	0	0	0	0	0	0	0	0	0	0	0	0	0	0	0	0	0	0	0	0	0	0	1	0.5	0	0.2	0.5	0	0	0	0	0	0	0	0	0	0	0	0	0	0	0	0	0.3	0
Hoyo	Medium	18	H_M_18	0	0	0.5	0	0	0	0	0	0	0	0	0	0	0	0	0	0	0	0	0	0.1	0	0	3	0.8	0	1.5	1	1	0.4	0	0	0	0	0	0	0	2	0	0	0	0	0	0	3	0
Hoyo	Medium	19	H_M_19	0	0	0.4	0	0	0	0	0	0	0	0	0	0	0	0	0	0.5	0	0	2.5	12	0	0	3.5	1.5	0	1	0.5	0	0	0.5	0.5	0	0	0	0	0	1	0	0	0	0	0	0	1.2	0
Hoyo	Medium	20	H_M_20	0	0.2	0	0	0	0	0	0	0	0	0	0	0	0	0	0	0	0	0	0	0.2	0	0	6	0.8	0	0	1.5	1	0	0	0.2	0	0	0	0	0	1.5	0	0	0	0	0	0	0.3	0
Hoyo	Medium	21	H_M_21	0	0	0	0	0	0	0	0.5	0	3.5	0	0	0	0	0	0.8	0	0	0.5	0	0	0	0	4	0	1	0	2	0	0.8	0	0	0	0	0	0	0	25	0	0	0	0	0.8	0	0.8	0
Hoyo	Medium	22	H_M_22	0	0	0	0	0	0	0	0	0	3	0	0	0	0	0	0	0	0	0	0	2	0	0	4	0	0	0.3	4	0.2	0	0	0	0	0	0	0	0	1.5	0	0	0	0	0	0	0.8	0
Hoyo	Medium	23	H_M_23	0	0	0	0	0	0	0	0	0	0	0	0	0	0	0	0	0	0	0	0	0.3	0	0	6	0.5	0	0	3.5	0.5	0	0	0	3.5	0	0	0	0	0.8	0	0	0	0	0	0	0.8	0
Hoyo	Medium	24	H_M_24	0	0	0	0	0	0	0	0	0	0	0	0	0	0	0	0	0	0	0	0	0.2	0	0	3.5	0.3	0	0.8	0	0.5	0	0	0	3	0	0	0	0	2	0	0	0	0	0	0	1.5	0
Hoyo	Medium	25	H_M_25	0	0	0	0	0	0	1	0.5	0	12	0	0	0	0	0	0	0	0	2.5	0	0	0	0	4	0.8	1.5	0	1.5	4	0	0.3	0	0	0	0	0	0	8	0	0	0	0	0	0	0.8	0
Hoyo	Medium	26	H_M_26	0	0	0	0	0	0	0	0.8	0	7	0	0	0	0	0	0.1	0	0	2	0	3.5	0	0	5	0.8	0.5	0.4	1	2	0.5	0.3	0	0	0	0	0	0	2.5	0	0	0	0	0	0	0	0
Hoyo	Medium	27	H_M_27	0	0	0	0	0	0	0	0	2	0.8	0	0	0	0	0	0.1	0	0	1	0	40	0	0	4	0	0	0.5	0	0.8	0	0	0	0	0	0.2	0	0	3.5	0	0	0	0	0	0	0	1
Hoyo	Medium	28	H_M_28	0	0.5	0	0	0	0	0	0	0	2.5	0	0	0	0	0	0	0	0	0.8	0	0	0	0	8	0	0	0	0	2	0	0	0	0	0	3	0	0	10	0	0	0	0	1	0	0.5	0
Hoyo	Medium	29	H_M_29	0	0	0	0	0	0	1	0.4	0	10	0	0	0	0	0	0	0	0	0	0	0	0	0	3	0.3	0	0	0.5	3	0	0	0.8	0	0	0	0	0	4	0	0	0	0	0	0	0	0
Hoyo	Medium	30	H_M_30	0	0	0	0	0	0	0.8	0	0	3	0	0	0	0	0	0	0	0	0	0	0	0	0	12	0.8	0	0.3	2.5	0.7	0	0	0	0	0	0	0	0	1	0	0	0	0	0	0	0	0
Hoyo	Medium	31	H_M_31	0	0	0	0	0	0	0	1.5	0	3	0	0	0	0	0	0	0	0	0.5	2.5	5	0	0	8	1.5	0.8	0.2	1.5	0.5	0	0	3	0	0	0	0	0	2.5	0	0	0	0	0	0	0.6	1
Hoyo	Medium	32	H_M_32	0	0	0	0	0	0	0	1	0	7	0	0	0	0	0	0	0	0	0.8	0	3	0	0	3	0	0.5	0	0.8	1	0	0.3	0	0	0	2.5	0	0	5	0	0	0	0	2	0	0	0
Hoyo	Medium	33	H_M_33	0	0	0	0	0	0	0	0	0	1.5	0	0	0	0	0	0	0	0	0	0	0.1	0	0	7	0	0.8	0	1.5	0.8	0.5	0	0	0	0	2	0	0	3.5	0	0	0	0	0	0	0.8	0
Hoyo	Medium	34	H_M_34	0	0	0	0	0	0	0	0	0	0	0	0	0	0	0	0	0	0	0	0	4	0	0	3.5	0	0	0.5	1.5	0.8	0	0	0	5	0	0	0	0	1.5	0	0	0	0	0	0	0	0
Hoyo	Medium	35	H_M_35	0	0	0	0	0	0	0	0	0	4	0	0	0	0	0	0	0	0	0	0	0.1	0	0	3.5	1	0.8	0.5	2.5	0	0.8	0.3	0	0	0	0	0	0	1.5	0	0	0	0	0	0	2.5	0
Hoyo	Low	1	H_W_01	0	0	0	0	0	0	0	0.8	0	4	0	0	0	0	0	0	3	0.2	8	0	0	0	0	0.5	0	8	0	0	0	0	0	0	0	0	0	0	0	0	0	0	0	1.5	0	0	0	0
Hoyo	Low	2	H_W_02	0	1.5	0	0	0	0	0	1.5	0	10	0	0	0	0	0	0	0.5	0.5	1.5	0	0	0	0	1	0.8	5	0	0	1.5	0	0	0	0	0	0	0	0	4	0	0	0	0	0	0	0	0
Hoyo	Low	3	H_W_03	0	0	0	0	0	0	0	0	0	0	0	0	0	0	0	0	0	0	1.5	0	0	0	0	4	1	2	0	0	0.5	0	0	0	0	0	0	0	0	0	0	0	0	4	0	0	0	0
Hoyo	Low	4	H_W_04	0	0	0	0	0	0	0	0	0	0	0	0	0	0	0	0	1.5	0	0	7	0	0	0	0	0.8	2.5	0	0	0	0	0	0	0	0	0	0	0	0	0	0	0	55	0	0	0	0
Hoyo	Low	5	H_W_05	0	0	0	0	0	0	0	0	0	0	0	0	0	0	0	0	0	0	0	5	0	0	0	0.8	1	0	0	0	0.5	0	0	0	0	0	0	0	0	0	0	0	0	3	0	0	0	0
Hoyo	Low	6	H_W_06	0	0	0	0	0	0	0	0	0	0	0	0	0	0	0	0	0	0	0	0	0	0	0	0.3	2	0	0	0.4	0.4	0	0	1.5	0	0	0	0	0	0	0	0	0	25	0	0	0	0
Hoyo	Low	7	H_W_07	0	0	0	0	0	0	0	0	0	0	0	0	0	0	0	0	0	0	0	3	0	0	0	0.5	1.5	0	0.3	0.3	0	0	0	0.6	0	0	0	0	0	0	0	0	0	3	0	0	0	0
Hoyo	Low	8	H_W_08	0	0	0	0	0	0.4	0	0	0	0	0	0	0	0	0	0	0.8	0	0	3	0	0	2.5	0.5	2.5	1.5	0	0	2	0	0	0	0	0	0.1	0	0	0	0	0	0	35	0	0	0	0
Hoyo	Low	9	H_W_09	0	0	0	0	0	0	0	1	0	1.5	0	0	0	0	0	0	0.5	0.2	0.8	1.5	0	0	1.5	0	0.8	3	0	0	1.5	0	0	0	0	0	0	0	0	0	0	0	0	15	0	0	0	0
Hoyo	Low	10	H_W_10	0	0	0	0	0	0	0	0	0	0.8	0	0	0	0	0	0	0.3	0.2	1.5	2.5	0	0	0.4	0	0.8	2	0	0	0.4	0	0	0	0	0	0.2	0	0	0	0	0	0	14	0	0	0	0
Hoyo	Low	11	H_W_11	0	0	0	0	0	0	0	0	0	0	0	0	0	0	0	0	0	0	0	0	0	0	0	0.3	1	1	0.4	0	0.8	0	0	0	0	0	0	0	0	0	0	0	0	7	0	0	0.4	0
Hoyo	Low	12	H_W_12	0	0	0	0	0	0	0	0	0	0.5	0	0	0	0	0	0	0	0	0	1.5	0.2	0	0.8	0.3	1	1.5	0	0.8	0.5	0	0	0	0	0	0	0	0	0	0	0	0	28	0	0	0	0
Hoyo	Low	13	H_W_13	0	0	0	0	0	0	0	0	0	8	0	0	0	0	0	0	0	0.4	0	0.8	0	0	0	0.8	0	3.5	0	0	0.5	0	0	0	0	0	0	0	0	0	0	0	0	28	0	0	0	0
Hoyo	Low	14	H_W_14	0	0	0	0	0	0	0	0	1	2.5	0	0	0	0	0	0	0	0.5	0	0	0.2	0	0.8	0.2	0	0.5	0.2	0	1.5	0	0	0	0	0	0	0	0	0	0	0	0	48	0	0	0	0
Hoyo	Low	15	H_W_15	0	0	0	0	0	0	0	0	0	0	0	0	0	0	0	0	0	0	0	1	4	0	0.8	1	1.5	0	0	0	0.8	0	0	0	0	0	0	0	0	0	0	0	0	10	0	0	0	0
Hoyo	Low	16	H_W_16	0	0	0	0	0	0	0	0	0	0	0	0	0	0	0	0	0	0	0	0	0.1	0	1	0.5	1.5	0	0	0	0.5	0	0	1	0	0	0	0	0	0	0	0	0	20	0	0	0	0
Hoyo	Low	17	H_W_17	0	0	0	0	0	0	0	0	0	0	0	0	0	0	0	0	0	0	0	2	0.1	0	0	0.3	1.5	0	0	0.7	0.3	0	0	0	0	0	3	0	0	0	0	0	0	7	0	0	0	0
Hoyo	Low	18	H_W_18	0	0	0	0	0	0	0	0	0	0	0	0	0	0	0	0	0	0	0	1.2	0	0	0	0.8	1	1	0	0.4	0.2	0	0	0.2	0	0	0	0	0	0	0	0	0	10	0	0	0	0
Hoyo	Low	19	H_W_19	0	0	0	0	0	0	0	0	0	0.2	0	0	0	0	0	0	0	0	0	0	3.5	0	2	0.8	1	0.8	0	0.5	0	0	0	0	0	0	0	0	0	0	0	0.2	0	12	0	0	0	0
Hoyo	Low	20	H_W_20	0	0	0	0	0	0	0	0	0	0	0	0	0	0	0	0	0	0	0	3.5	0	0	0	1.5	1	0	0	1.5	0	0	0.2	0	0	0	0	0	0	0	0	0	0	3	0	0	0	0
Hoyo	Low	21	H_W_21	0	0	0	0	0	0	0	0	0	0	0	0	0	0	0	0	0	0	0	1.5	0	0	0	1.5	1.5	0.8	0.2	0.5	0.4	0	0	0.5	0	0	0	0	0	0	0	0	0	16	0	0	0	0
Hoyo	Low	22	H_W_22	0	0	0	0	0	0	0	0	0	0	0	0	0	0	0	0	0	0	0	0	0	0	0	1	1.5	0.5	0	0.4	0.5	0	0	0	0	0	0	0	0	0	0	0	0	12	0	0	0	0
Hoyo	Low	23	H_W_23	0	0	0	0	0	0	0	0	0	0	0	0	0	0	0	0	0	0	0	1	0	0	0	3	1	0.8	0	1	0	0	0	1.5	0	0	0	0	0	0	0	0	0	28	0	0	0	0
Hoyo	Low	24	H_W_24	0	0	0	0	0	0	0	0	0	0	0	0	0	0	0	0	0	0	0	7	0	0	0	1.5	1.5	0	0.3	0.4	0.5	0	0	0	0	0	0	0	0	0	0	0	0	4	0	0	0	0
Hoyo	Low	25	H_W_25	0	0	0	0	0	0	0	0	0	0	0	0	0	0	0	0	0	0.5	0	0	0	0	0	2	1	0.7	0	0	0	0	0	0	0	0	0	0	0	0.8	0	0	0	8	0	0	0	0
Hoyo	Low	26	H_W_26	0	0	0	0	0	0	0	0	0	1	0	0	0	0	0	0	0	0.2	0	0.5	0	0	0	1.2	1.2	0.4	0	0.4	0	0	0	0.3	0	0	0	0	0	0	0	0	0	0	0	0	0	0
Hoyo	Low	27	H_W_27	0	0	0	0	0	0	0	0	0	0	0	0	0	0	0	0	0	0	0	0	0	0	0	0.6	1	0.3	0.2	0	0.3	0	0	1.5	0	0	0	0	0	0	0	0	0	5	0	0	0	0
Hoyo	Low	28	H_W_28	0	0	0	0	0	0	0	0	0	0	0	0	0	0	0	0	0	0	0	1	0	0	0	1	1	0.8	0	0.8	0.4	0	0	0	0	0	0	0	0	0	0	0	0	5	0	0	0	0
Hoyo	Low	29	H_W_29	0	0	0	0	0	0	0	0	0	0.5	0	0	0	0	0	0	0	0	0	1	0	0	1.5	0.3	1	1	0.2	0.5	0.2	0	0	0	0	0	0	0	0	0	0	0	0	32	0	0	0	0
Hoyo	Low	30	H_W_30	0	0	0	0	0	0	0	0	0	1	0	0	0	0	0	0	0	0.3	0	0	0.1	0	0.6	1.5	1	1.5	0	0	0.8	0	0	0	0	0	0	0	0	0	0	0	0	22	0	0	0	0
Hoyo	Low	31	H_W_31	0	0	0	0	0	0	0	0	0	0	0	0	0	0	0	0	0	0	0	1.5	0	0	0	0.1	1.5	1.5	0	0	0.8	0	0	0	0	0	0	0	0	0	0	0	0	15	0	0	0	0
Hoyo	Low	32	H_W_32	0	0	0	0	0	0	0	0	0	0	0	0	0	0	0	0	0	0.2	0	6	0	0	0	1	2	1	0	0	0.3	0	0	0	0	0	0	0	0	0	0	0	0	8	0	0	0	0
Hoyo	Low	33	H_W_33	0	0	0	0	0	0	0	0	0	0	0	0	0	0	0	0	0	0	0	0	0.1	0	0	0	0.5	0.8	0	0	0	0	0	0	0	0	0	0	0	0	0	0	0	6	0	0	0	0.1
Hoyo	Low	34	H_W_34	0	0	0	0	0	0	0	0	0	0	0	0	0	0	0	0	0	0	0	1	0	0	0	0.8	1	1	0	0	0	0	0	0	0	0	0	0	0	0	0	0	0	15	0	0	0	0
Hoyo	Low	35	H_W_35	0	0	0	0	0	0	0	0	0	1	0	0	0	0	0	0	0	0	0	2	0	0	0	0	1	0.3	0	0.3	0	0	0	0	0	0	0	0	0	0	0	0	0	6	0	0	0	0
Pedriza	High	1	P_H_01	0	0	0	0	0	0	0	0.5	0	3	0	0	0	0	0	0	0	0	0	0	0	0	0	0	0	0	0	2	0	0	0.5	0	0	0	0	0	0	8	0	0	0	0	0	0	0	0
Pedriza	High	2	P_H_02	0	0	0	0	0	0	0	0	0	0	0	0	0	0	0	0	0	0.5	0	0	5	0	0	0	0	0	0	1	2	0	0	0	0	0	0	0	0	1	0	0	0	0	0	0	0	0
Pedriza	High	3	P_H_03	0	0	0	0	0	0	0	0	0	1	0	0	0	0	0	0	0	0	0	0	5	1.5	0	0	0	0	0	1.5	0	0	0	0	0	0	0	0	0	5	0	0	0	0	0	0	0	0
Pedriza	High	4	P_H_04	0	0	0	0	0	0	0	0	0	2	0	0	0	0	1.5	0	0	0	0	0	5	0	0	0	0	0	0	3	0	0	0	0	0	0	0	0	0	10	0	0	0	0	0	0	1.5	0
Pedriza	High	5	P_H_05	0	0	0	0	2	0	0	0.5	0	12	0	0	0	0	0	0	0	0.2	0	0	6	0	0	0	0	0	0	2	0	0	1.5	0	0	0	0	0	0	10	0	0	0	0	0	0	3	0
Pedriza	High	6	P_H_06	0	1.5	0	0	0	0	0	0	0	8	0	0	0	0	0	0	0	0	0.8	10	8	0	0	0.8	0	0.9	0	2	0.8	0	0.8	0	0	0	0	0	0	15	0	0	0	0	0	0	6	0
Pedriza	High	7	P_H_07	0	8	0	0	0	0	0	0	0	0	0	0	0	0	0	0	0.5	0	0	0	2	0	0	0	0	0	0	1	0	0	3	0	0	0	0	0	0	12	0	0	0	0	0	0	0	0
Pedriza	High	8	P_H_08	0	0.2	0	0	0	0	0	0	0	5	0	0	0	0	0	0	0.2	0.2	0	0	8	0	0	0	0	0	0	5	0.2	0	0.8	0	0	0	0	0	0	12	0	0	0	0	0	0	1	0
Pedriza	High	9	P_H_09	0	0	0	0	0	0	0	0	0	3	0	0	0	0	0	0	0	0	0	0	0	0	0	0	0	0	0	4	0	1	0	0	2	0	0	0	0	15	0	0	0	0	0	0	0	0
Pedriza	High	10	P_H_10	0	0	0	0	0	0	0	0	0	3	0	0	0	0	0	0	0	0	0	0	0	0	0	0	0	0	0	5	0	0	0	0	1	0	0	0	0	5	0	0	0	0	0	0	0.8	0
Pedriza	High	11	P_H_11	0	0	0	0	0	0	0	0	0	8	0	0	0	0	0	0	0	0	0	0	3	0	0	0	0	0	0	4	1	1	0	0	0	0	0	0	0	8	0	0	0	0	0	0	2	0
Pedriza	High	12	P_H_12	0	0.2	0	0	0	0	0	0	0	6	0	0	0	0	0	0	0	0	0	0	0	0	0	0.2	0	0.2	0	3	1	0.2	0.2	0	0	0	0	0	0	12	0	0	0	0	0	0	2.5	0
Pedriza	High	13	P_H_13	0	0	0	0	0	0	0	0.2	0	3	0	0	0	0	0	0	1	0	1.5	0	0	0	0	0.4	0	3	1	4	3	0	0	0.8	0	0.3	0	0	0	16	0	0	0	0	0	0	0	0
Pedriza	High	14	P_H_14	0	1	0	0	0.2	0	0	0	0	7	0	0	0	0	0	0	0	0	2.5	0	2	0	0	0	0	0.8	0	2	0	0	0.2	0	0	0	0	0	0	6	0	0	0	0	0	0	2	0
Pedriza	High	15	P_H_15	0	0	0	0	0	0	0	0	0	0.8	0	0	0	0	0	0	0	0	0	0	0.8	0	0	0	0	0.8	0	1.5	1.5	0	1.5	2	0	0	2	0	0	1	0	0	0	0	0	0	0.5	0
Pedriza	High	16	P_H_16	0	0	0	0	0.5	0	0	0.5	0	2	0	0	0	0	0	0	0	0	1	0	1.5	0	0	0	0	0	0	3	0.5	0	0.6	0	0	0	0	0	0	9	0	0	0	0	0	0	0.8	0
Pedriza	High	17	P_H_17	0	0	0	0	0.6	0	0	0.2	0	4	0	0	0	0	0	0	0	0	0.8	0	8	0	0	0	0	0	0	4	0	0	0	0	0	0	0	0	0	10	0	0	0	0	0	0	0	0
Pedriza	High	18	P_H_18	0	0	0	0	0	0	0	0	0	0	0	0	0	0	0	0	0	0	0	0	2	0	0	0	0	0	0	1	1	0	2	0	0	0	0	0	0	1	0	0	0	0	0	0	1	0
Pedriza	High	19	P_H_19	0	5	0	0	0	0	0	0	0	0	0	0	0	0	0	0	0	0	1	0	0	0	0	0	0	0	0	0.8	0	0	0	0	0	0	0	0	0.1	6	0	0	0	0	0	0	1	0
Pedriza	High	20	P_H_20	0	1	0	0	0	0	0	0	0	0.8	0	0	0	0	0	0	0	0	0	0	8	0	0	3	0	0	0.5	2.5	0	0	0.5	0	0	0	0	0	0	2	0	0	0	0	0	0	3	0
Pedriza	High	21	P_H_21	0	10	0	0	0	0	0	0.8	0	0.2	0	0	0	0	0	0	0	0	1	0	0	0	0	0	0	0.8	0	3	1	0	0	0	0	0	0	0	0	15	0	0	0	0	0	0	0	0
Pedriza	High	22	P_H_22	0	0	0	0	0	0	0	0	0	0	0	0	0	0	0	0	0	0.1	0	0	10	0	0	0	0	1	0	4	0	0	0.5	0	0.8	0	0	0	0	3	0	0	0	0	0	0	1	0
Pedriza	High	23	P_H_23	0	0	0	0	0	0	0	0	0	0	0	0	0	0	0	0	0	0	0	0	0	0	0	2	1	0.4	0	3	0	0	0	0	0.8	0	0	0	0	2	0	0	0	0	0	0	3	0
Pedriza	High	24	P_H_24	0	3	0	0	0	0	0	0	0	1.5	0	0	0	0	0	0	0	0	0	4	0	0	0	7	0.9	1	0	1.2	0	0.2	0.2	0	0.7	0	0	0	0	8	0	0	0	0	0	0	9	0
Pedriza	High	25	P_H_25	0	0	0	0	0	0	0	0	0	0	0	0	0	0	0	0	0	0.2	0	0	2	0	0	3	0	0.5	0	10	0	0	0	0	0.5	0	0	0	0	4	0	0	0	0	0	0	0.5	0
Pedriza	High	26	P_H_26	0	1.5	0	0	0	0	0	0	0	0	0	0	0	0	0	0	0	0.1	0	0	0	0	0	10	0	0	0	0.8	0.1	0	0.8	0	12	0	0	0	0	0	0	0	0	0	0	0	0	0
Pedriza	High	27	P_H_27	0	5	0	0	0	0	0	0.1	0	0	0	0	0	0	0	0	0	0.1	0	0	0.5	0	0	0.5	0	0	0	3	0	4	0	0	1	0	0	0	0	2	0	0	0	0	2	0	0	0
Pedriza	High	28	P_H_28	0	20	0	0	0	0	0	0	0	0	0	0	0	0	0	0	0	0.5	0	0	0	0	0	1	0	0.1	0	0	0	0	0	0	4	0	0	0	0	0	0	0	0	0	2	0	0	0
Pedriza	High	29	P_H_29	0	0	0	0	0	0	0	0	0	0	0	0	0	0	0	0	0	0	0	0	10	0	0	0.1	0	0.1	0.1	1	0	0	0	0	0	0	0	0	0	3	0	0	0	0	0	0	2	0
Pedriza	High	30	P_H_30	0	0	0	0	0	0	0	0	0	4	0	0	0	0	0	0	0	0	0	0	0	0	0	2	0	0	0.8	4	0	0	0	0	0	0	0	0	0	4	0	0	0	0	0	0	3	0
Pedriza	High	31	P_H_31	0	0	0	0	0	0	0	0	0	0	0	0	0	0	0	0	0	0	0	10	2	0	0	2	2	1.5	0	1	0.5	0	0	4	0	0	0	0	0	2	0	0.5	0	0	0	0	2	0
Pedriza	High	32	P_H_32	0	0	0.5	0	0	0	0	0	0	4	0	0	0	0	0	0	0	0	0	0	8	0	0	0.8	0	0.8	0	3	0.8	0	0.3	0.8	0	0	5	0	0	2	0	0	0	0	0	0	2	0
Pedriza	High	33	P_H_33	0	3	0	0	0	0	0	0.1	0	2	0	0	0	0	0	0	0	0.1	0	0	0	0	0	0.2	0	0.8	0	3	0	0	0	0	0	0.1	0	0	0	12	0	0	0	0	0	0	0.2	0
Pedriza	High	34	P_H_34	0	0	0	0	0	0	0	0.3	0	0.8	0	0	0	0	0	0	0	0	0	0	0.3	0	0	0	0	0.1	0.1	3.5	0	0	0.5	0	0	0	0	0	0	1.5	0	0	0	0	0	0	1	0
Pedriza	High	35	P_H_35	0	0	0	0	0	0	0	0	0	2	0	0	0	0	0	0	0	0.1	0	0.5	0	0	0	1	0	0.8	0.2	2	0	0	0	0	0	0	0	0	0	1.5	0	0	0	0	0	0	3	0
Pedriza	Medium	1	P_M_01	0	0	0	0	0	0	0	0	0	0	0	0	0	0	0	0	0	0	0.1	0	0	0	0	12	0.1	0	0.2	4	0	0.5	0	0	4	0	0	0	0	0.5	0	0	0	0	0	0	0	0
Pedriza	Medium	2	P_M_02	0	0	0	0	0	0	0	0	0	0	0	0	0	0	0	0	0	0	0	0	0	0	0	15	0	0	0	4.5	0	2	0	0	10	0	0	0	0	2.5	0	0	0	0	0	0	0	0
Pedriza	Medium	3	P_M_03	0	0	0	0	0	0	0	0	0	0	0	0	0	0	0	0	0	0	0	0	0	0	0	10	0	0	0	3	0	0	1.5	0	3	0	0	0	0	2	0	0	0	0	0	0	1	0
Pedriza	Medium	4	P_M_04	0	0	0	0	0	0	0	0	0	0	0	0	0	0	0	0	0	0	0	0	0	0	0	4	0	0	0	3	0	1.5	0	0	2	0	0	0	0	2	0	0	0	0	0	0	1.5	0
Pedriza	Medium	5	P_M_05	0	0	0	0	0	0	0	0	0	0	0	0	0	0	0	0	0	0	0	0	8	0	0	2.5	0.5	0	2	3	0	1	0	0	0	0	0	0	0	2	0	0	0	0	0	0	1.5	0
Pedriza	Medium	6	P_M_06	0	1	0	0	0	0	0	0	0	0	0	0	0	0	0	0	0	0	0	0	0	0	0	14	0	0	0.3	3	0	0	0	0	1	0	0	0	0	3	0	0	0	0	0	0	0.2	0
Pedriza	Medium	7	P_M_07	0	1	0	0	0	0	0	0	0	1	0	0	0	0	0	0	0	0	0	0	2	0	0	8	0.5	0	3	3.5	0.5	0	0	0	0.3	0	0	0	0	5	0	0	0	0	0	0.1	3	0
Pedriza	Medium	8	P_M_08	0	0	0	0	0	0	0	0	0	10	0	0	0	0	0	0	0	0	0.1	0	8	0	0	4	0.5	0	0	1.5	0	0	0.1	0	0	0	0	0	0	2	0	0	0	0	0	0	3	0
Pedriza	Medium	9	P_M_09	0	0	0	0	0	0	0	0	0	4.5	0	0	0	0	0	0	0	0	1.5	0	0	0	0	2	0	0	0	3	1	0	0	0	0	0	0	0	0	8	0	0	0	0	0	0	0.2	0
Pedriza	Medium	10	P_M_10	0	0	0	0	0	0	0	0	0	5	0	0	0	0	0	0	0	0	1	0	0	0	0	8	0.1	0	0	4	0.5	0	0	0	0	0	0	0	0	1.5	0	0	0	0	0	0	0	0
Pedriza	Medium	11	P_M_11	0	0	0	0	0	0	0	0	0	0	0	0	0	0	0	0	0	0	0	0	0	0	0	4	0	0	0	8	0	0	0	0	0	0	0	0	0	2	0	0	0	0	0	0	0	0
Pedriza	Medium	12	P_M_12	0	0	0	0	0	0	0	0	0	0	0	0	0	0	0	0	0	0	0	0	0	0	0	1.5	0	0	0	8	0	0	0	0	0	0	0	0	0	10	0	0	0	0	0	0	0	0
Pedriza	Medium	13	P_M_13	0	0	0	0	0	0	0	0	0	0	0	0	0	0	0	0	0	0	0	0	0.1	0	0	9	0.2	0	0	8	0	0.5	0	0	6	0	0	0	0	3.5	0	0	0	0	0	0	1	0
Pedriza	Medium	14	P_M_14	0	0	0	0	0	0	0	0	0	0	0	0	0	0	0	0	0	0	0	0	0.2	0	0	18	0	0	0	6.5	0	0	0	0	5	0	0	0	0	2	0	0	0	0	0	0	0.5	0
Pedriza	Medium	15	P_M_15	0	0	0	0	0	0	0	0	0	0	0	0	0	0	0	0	0	0	0	0	0	0	0	20	0.2	0	0.2	4	0	0	0	0	15	0	0	0	0	3.5	0	0	0	0	0	0	0.5	0
Pedriza	Medium	16	P_M_16	0	0	0	0.5	0	0	0	0	0	0	0	0	0	0	0	0.1	0	1	0	0	0	0	0	30	0	0	0	2	0	0.5	0	0	30	0	0	0	0	4	0	0	0	0	0	0	0	0.2
Pedriza	Medium	17	P_M_17	0	0	0	0	0	0	0	0	0	0	0	0	0	0	0	0	0	0.1	0	0	0	0	0	35	0	0	0	3	0	1.5	0	0	15	0	0	0	0	2	0	0	0	0	0	0	0	0
Pedriza	Medium	18	P_M_18	0	0	0	0	0	0	0	0	0	0	0	0	0	0	0	0	0	0	0	0	0	0	0	18	0.2	0	1	1.5	0	0	0	0	20	0	0	0	0	1	0	0	0	0	0	0	0	0
Pedriza	Medium	19	P_M_19	0	0	0	0	0	0	0	0	0	0	0	0	0	0	0	0	0	0	0	0	0	0	0	5	0	0	1	8	0.5	0	0	0	10	0	0	0	0	2	0	0	0	0	0	0	0	0
Pedriza	Medium	20	P_M_20	0	0	0	0	0	0	0	0	0	0	0	0	0	0	0	0	0	0	0	0	0	0	0	5.5	0	0	1	2.5	0.5	0	0	0	2	0	0	0	0	2	0	0	0	0	0	0	1.5	0
Pedriza	Medium	21	P_M_21	0	0	0	0	0	0	0	0	0	0	0	0	0	0	0	0	0	0	0	0	0	0	0	10	0.5	0	1	0	0	1	0.5	0	12	0	0	0	0	1.5	0	0	0	0	0	0	0	0
Pedriza	Medium	22	P_M_22	0	0	0	0	0	0	0	0	0	0	0	0	0	0	0	0	0	0.1	0	0	0	0	0	8	0	0	3	6	1	0	0	0	2	0	0	0	0	1.5	0	0	0	0	0	0	0.5	0
Pedriza	Medium	23	P_M_23	0	0	0	0	0	0	0	0	0	0	0	0	0	0	0	0	0	0	0	0	0	0	0	12	0.1	0	0	3	0	0.5	0	0	28	0	0	0	0	2	0	0	0	0	0	0	0.5	0
Pedriza	Medium	24	P_M_24	0	0	0	1	0	0	0	0	0	0	0	0	0	0	0	0	0	1	0	0	0	0	0	22	0.5	0	0	1.5	0	0	0.5	0	6	0	0	0	0	2	0	0	0	0	0	0	1	0
Pedriza	Medium	25	P_M_25	0	0	0	0	0	0	0	0	0	0	0	0	0	0	0	0	0	0.2	0	0	0	0	0	15	1	0	0.1	3.5	0.5	2	0	0	14	0	0	0	0	1	0	0	0	0	0	0	0	0
Pedriza	Medium	26	P_M_26	0	0	0	0	0	0	0	0	0	0	0	0	0	0	0	0	0	0.1	0	0	0.1	0	0	12	0	0	0.3	4	0	1.5	0	0	6	0	0	0	0	3	0	0	0	0	0	0	0.2	0
Pedriza	Medium	27	P_M_27	0	0	0	0	0	0	0	0	0	0.1	0	0	0	0	0	0	0	0.5	0	0	3	0	0	20	0	0	0	1	0	3	0.3	0	30	0	0	0	0	0	0	0	0	0	0	0	0	0
Pedriza	Medium	28	P_M_28	0	0	0	0	0	0	0	0	0	0	0	0	0	0	0	0	0	0	0	0	0.3	0	0	12	0	0	0.5	3	0	3	0.3	0	8	0	0	0	0	1	0	0	0	0	0	0	0	0
Pedriza	Medium	29	P_M_29	0	0	0	0	0	0	0	0	0	0	0	0	0	0	0	0	0	0	0	0	0	0	0	12	2	0	0	2.5	0	0	0	0	0	0	10	0	0	4	0	0	0	0	0	0	3	0
Pedriza	Medium	30	P_M_30	0	0	0	0	0	0	0	0	0	0	0	0	0	0	0	0	0	0	0	0	0	0	0	8	0	0	0	6	0	0	0	0	0	0	0	0	0	5	0	0	0	0	0	0	0	0
Pedriza	Medium	31	P_M_31	0	1.5	0	0	0	0	0	0	0	9	0	0	0	0	0	0	0	0	1	0	0	0	0	3	0	0	0	0	0	0	0	0	0	0	0	0	0	7	0	0	0	0	0	0	1	0
Pedriza	Medium	32	P_M_32	0	0	0	0	0	0	0	0	0	0	0	0	0	0	0	0	0	0	0	0	0	0	0	2	0	0	0	0	0.1	0	0	0	0	0	0	0	0	12	0	0	0	0	22	0	1.5	0
Pedriza	Medium	33	P_M_33	0	0	0	0	0	0	0	0	0	6	0	0	0	0	0	0	0	0	0	0	3	0	0	4	0	0	0	2.5	2	0	0	0	0	0	0	0	0	9	0	0	0	0	0	0	3	0
Pedriza	Medium	34	P_M_34	0	0	0	0	0	0	0	0	0	2.5	0	0	0	0	0	0	0	0	0	0	3	0	0	5	0	0	0	5	0.1	0	0	0	0	0	0	0	0	9	0	0	0	0	0	0	1	0
Pedriza	Medium	35	P_M_35	0	0	0	0	0	0	0	0	0	2	0	0	0	0	0	0	0	0	0	0	0	0	0	20	0	0	0	6.5	0	0	0	0	0	0	0	0	0	6	0	0	0	0	0	0	0.2	0
Pedriza	Low	1	P_W_01	0	0	0	0	0	0	0	0	0	0	0	0	0	0	0	0	0	0.1	0	0	0	0	0	6	1.8	0	4	4	3	1	0	1	8	0	0	0	0	0.5	0	0	0	0	0	0	0	0
Pedriza	Low	2	P_W_02	0	0	0	0	0	0	0	0	0	0	0	0	0	0	0	0	0	0	0	0	0	0	0	5	1	0	2	6	0	4	0	0.5	0	0	0	0	0	3	0	0	0	0	0	0	0	0
Pedriza	Low	3	P_W_03	0	0	0	0	0	0	0	0	0	0	0	0	0	0	0	0	0	0	0	0	0.05	0	0	3	3	0	3	6	0.8	0.8	0	0	0	0	0	0	0	6	0	0	0	0	0	0	0	0
Pedriza	Low	4	P_W_04	0	0	0	0	2	0.8	0	0	0	0	0	0	0	0	0	0	0	0	0	0	0	0.8	0	6	2	0	1	2	1	0	0	0	0	0	0	0	0	3	0	0	0	0	4	0	1.5	0
Pedriza	Low	5	P_W_05	0	0	0	0	0	1.5	0	0	0	0	0	0	0	0	0	0	0	0	0	0	1	0	0	4	4	0	1.5	0.3	1	0	0	2	0	0	0	0	0	12	0	0	0	0	0	0	0.2	0
Pedriza	Low	6	P_W_06	0	0	0	0	1.5	1	0	0.8	0	0	0	0	0	0	0	0.1	0	0	1	0	1	3	0	2	2	0	2	0.3	9	0	0	1	0	0	0	0	0	4	0	0	0	0	0	0	0	0
Pedriza	Low	7	P_W_07	0	0	0	0	7	2	0	0.2	0	10	0	0	0	0	0	0	0	0	0	0	6	6	0	2	4	0.5	1	0.2	7	0.2	0	0.8	0	0	0	0	0	3	0	0	0	0	0	0	0.8	0
Pedriza	Low	8	P_W_08	0	0	0	0	0	2	0	0	0	0	0	0	0	0	0	0	0	0	0	0	9	0	0	3	5	0	3.5	0	1	0.2	0	0	0	0	8	0	0	4	0	0	0	0	0	0	0	0
Pedriza	Low	9	P_W_09	0	0	0	0	0	0	0	0	0	0	0	0	0	0	0	0	0	0.5	0	0	12	0	0	5	2	0	1.5	1	0	0.5	0	0	0	0	0	0	0	2	0	0	0	0	0	0	0	0
Pedriza	Low	10	P_W_10	0	0	0	0	1.5	1	0	0	0	0	0	0	0	0	0	0	0	0	0	0	4.5	0	0	7	5	0	2	1	1.5	0	0	0	0	0	0	0	0	4	0	0	0	0	0	0	0	0
Pedriza	Low	11	P_W_11	0	0	0	0	0	0.5	0	0	0	0	0	0	0	0	0	0	0	0	0	0	12	1.5	0	3	2	0	2	1.5	2.5	0	0	1	0	0	0	0	0	1	0	0	0	0	0	0	0.5	0
Pedriza	Low	12	P_W_12	0	0	0	0	1.5	2	0	0.6	0	0	0	0	0	0	0	0	0	0	0	0	1	1.5	0	3	4	0	2	2.5	5	0	0	2	0	0	0	0	0	3	0	0	0	0	0	0	0.4	0
Pedriza	Low	13	P_W_13	0	0	0	0	0	1	0	0	0	0	0	0	0	0	0	0	0	0	0	0	6	0	0	4	3	0	2	2	1	0	0	0	0	0	0	0	0	2.5	0	0	0	0	0	0	0	0
Pedriza	Low	14	P_W_14	0	0	0	0	0	1	0	0.8	0	0	0	0	0	0	0	0	0	0.5	0	0	22	0	0	3	5	0	0.8	1.5	0.5	0	0	0	10	0	0	0	0	4	0	0	0	0	0	0	0	0
Pedriza	Low	15	P_W_15	0	0	0	0	0	1	0	0	0	0	0	0	0	0	0	0	0	0	1	0	2.5	0	0	4	3	0	2	0.5	3	0	0	1	0	0	0	0	0	3	0	0	0	0	0	0	0	0
Pedriza	Low	16	P_W_16	0	0	0	0	2	0.8	0	1	0	0	0	0	0	0	0	0	0	0	0	0	8	0	0	5	4	0	2	0.5	4	0	0	0.8	0	0	0	0	0	4	0	0	0	0	0	0	1	0
Pedriza	Low	17	P_W_17	0	0	0	0	0.2	0.8	0	0	0	0	0	0	0	0	0	0	0	0	0	0	8	0.1	0	3	2.5	0	4	4	0.8	0	0	0	0	0	0.05	0	0	3.5	0	0	0	0	0	0	0	0
Pedriza	Low	18	P_W_18	0	0	0	0	3.5	0.3	0	0	0	0	0	0	0	0	0	0	0	0	0	0	0	0	0	5	1.5	0	1	1.5	1.5	0	0	0	0	0	0	0	0	3	0	0	0	0	0	0	0	0
Pedriza	Low	19	P_W_19	0	0	0	0	0	2	0	0	0	0	0	0	0	0	0	0	0	0	0	0	0	1.5	0	2.5	1.5	0	1.5	1	3.5	0	0	1.5	0	0	0	0	0	3	0	0	0	0	0	0	0.2	0
Pedriza	Low	20	P_W_20	0	0	0	0	4	0.5	0	0	0	0	0	0	0	0	0	0	0	0	0	0	0	0	0	3.5	2	0	0.5	2.5	4	0	0	0	0	0	0	0	0	3	0	0	0	0	0	0	0	0
Pedriza	Low	21	P_W_21	0	0	0	0	2.5	0	0	0	0	0	0	0	0	0	0	0	0	0	0	0	2.5	0	0	1.5	2	0	0.8	1	2	0	0	0	0	0	0	0	0	3	0	0	0	0	0	0	0.5	0
Pedriza	Low	22	P_W_22	0	0	0	0	0	0.6	0	0	0	0	0	0	0	0	0	0	0	0	0	0	15	1	0	3	3	0	2	2	0	1	0	1	0	0	0	0	0	2	0	0	0	0	0	0	0.5	0
Pedriza	Low	23	P_W_23	0	0	0	0	0	0	0	0	0	0	0	0	0	0	0	0	0	0.5	0	0	8	0	0	2	3	0	1.5	0.8	1	0	0	0	0	0	0	0	0	3	0	0	0	0	0	0	3.5	0
Pedriza	Low	24	P_W_24	0	0	0	0	0	0.8	0	0	0	0	0	0	0	0	0	0	0	0	0	0	9	0	0	3	1	0	0	0	0.5	0	0	0	0	0	0	0	0	2.5	0	0	0	0	0	0	0.5	0
Pedriza	Low	25	P_W_25	0	0	0	0	0	0	0	0	0	0	0	0	0	0	0	0	0	0	0	0	10	0	0	3.5	2	0	4	0.8	0	0	0	0	0	0	0	0	0	4	0	0	0	0	0	0	0	0
Pedriza	Low	26	P_W_26	0	0	0	0	0	0	0	0	0	0	0	0	0	0	0	0	0	0	0	0	5	0	0	3	2.5	0	1.5	3.5	0.2	0.8	0	4.5	0	0	0	0	0	3	0	0	0	0	0	0	1	0
Pedriza	Low	27	P_W_27	0	0	0	0	0	0	0	0	0	0	0	0	0	0	0	0	0	0	0	0	0	0	0	4	2	0	2.5	3	0.5	0	0	0	0	0	0	0	0	3	0	0	0	0	0	0	0	0
Pedriza	Low	28	P_W_28	0	0	0	0	1	0.5	0	0	0	5	0	0	0	0	0	0	0	0	0	0	6	0	0	5	1	0	0	3.5	1.5	0	0	0	0	0	0	0	0	3.5	0	0	0	0	0	0	0	0
Pedriza	Low	29	P_W_29	0	0	0	0	0	0	0	0	0	0	0	0	0	0	0	0	0	0	0	0	0	0	0	18	0.5	0	1	3	0	2.5	0.5	0	0	0	0	0	0	3	0	0	0	0	0	0	0.8	0
Pedriza	Low	30	P_W_30	0	0	0	0	0	0	0	0	0	0	0	0	0	0	0	0	0	0.2	0	0	0	0	0	20	7	0	0	8	0	3	0	0	0	0	0	0	0	4	0	0	0	0	0	0	0.3	0
Pedriza	Low	31	P_W_31	0	0	0	0	0	0	0	0	0	0	0	0	0	0	0	0	0	0	0	0	0	0	0	12	0.5	0	0	2	0	3	0	0	0	0	0	0	0	3.5	0	0	0	0	0	0	0	0
Pedriza	Low	32	P_W_32	0	0	0	0	0	0	0	0	0	0	0	0	0	0	0	0	0	1	0	0	0	0	0	40	0.5	0	0.5	4	0	15	0	0	0	0	0	0	0	7	0	0	0	0	1	0	0	0
Pedriza	Low	33	P_W_33	0.5	5	0	0	0	0	0	0	0	0	0	0	0	0	0	0	0	0	0	0	0	0	0	35	0.2	0	0	10	0	0.5	0	0	0	0	0	0	0	1	0	0	0.5	0	2	0.05	0	0
Pedriza	Low	34	P_W_34	0.2	0	0	0	0	0	0	0	0	0	0	0	0	0	0	0	0	0	0	0	0	0	0	40	0	0	0.5	2	0	6	0	0	0	0	0	0	0	0.5	0	0	0.2	0	0	0	0	0
Pedriza	Low	35	P_W_35	0	0.5	0	0	0	0	0	0	0	0	0	0	0	0	0	0.5	0	0	0	0	0	0	0	40	0	0	0	0	0	8	0	0	0	0	0	0.5	0	4	0	0	0	0	0	1	0	0
Valdemolino	High	1	V_H_01	0	0	0	0	0	0	0	0	0	0	0	0	0	0	0	0	0	0.3	0	0	12	0	0	1.5	0	0	0	0.5	0	0.6	0	0	0	0	0	0	0	2	0	0	0	0	0	0	1.5	0
Valdemolino	High	2	V_H_02	0	0	0	0	0	0	0	0	0	0	0	0	0	0	0	0	0	0	0	0	8	0	0	1.5	0	0.2	0	1	0.2	0	0	0	0	0	0	0	0	4	0	0	0	0	0	0	0	0
Valdemolino	High	3	V_H_03	0	0	0	0.3	0	0	0	0	0	0	0	0	0	0	0	0	0	0	0	0	8	0	0	1.5	1.5	0.3	0	1	0	0	0.5	0	0	0	0	0	0	1.5	0	0	0	0	0	0	0.5	0
Valdemolino	High	4	V_H_04	0	0	0	0	0	0	0	0	0	0	0	0	0	0	0	0	0	0	0	0	6	0	0	2	0.5	0	0.2	0.3	0	0	0.3	0.5	0	0	4	0	0	0	0	0	0	0	0	0	1.5	0
Valdemolino	High	5	V_H_05	0	0	0	0	0	0	0	0	0	1	0	0	0	0	0	0	0	0	0	0	0	0	0	1	1	0	0.7	3	0	0.3	0	0	0	0	0	0	0	2.5	0	0	0	0	0	0	0	0
Valdemolino	High	6	V_H_06	0	0	0	0	0	0	0	0	0	0	0	0	0	0	0	0	0	0	0	0	0	0	0	2.5	0.8	0	1.5	3	0	0	0	0	0	0	0	0	0	2.5	0	0	0.2	0	0	0	0	0
Valdemolino	High	7	V_H_07	0	0	0	0	0	0	0	0	0	4	0	0	0	0	0	0	0	0	0	0	5	0	0	2	1.5	0	1.5	2	0	0	0.3	0.7	3	0	0	0	0	0	0	0	0	0	0	0	0.8	0
Valdemolino	High	8	V_H_08	0	0	0	0	0	0	0	0	0	0	0	0	0	0	0	0	0	0	0	0	0	0	0	1	0.5	0	1.3	2	3	0	0	0.8	0	0	0	0	0	0.8	0	0	0	0	0	0	0	0
Valdemolino	High	9	V_H_09	0	0	0	0	0	0	0	0	0	0.6	0	0	0	0	0	0	0	0	0	0	1.5	0	0	0	1.3	0	3	3	0.8	0	0.3	0.5	0	0	0	0	0	0	0	0	0	0	0	0	0.7	0
Valdemolino	High	10	V_H_10	0	0	0	0	0	0	0	0	0	0	0	0	0	0	0	0	0	0	2.5	0	0	0	0	1	0.5	0	0.8	0	1	0	0	0.8	0	0	4	0	0	1	0	0	0	0	0	0	0	0
Valdemolino	High	11	V_H_11	0	0	0	0	0	0	0	0	0	0	0	0	0	0	0	0	0	0	0	0	5	0	0	3	1.5	0	0	0	0	0	0	0	0	0	0	0	0	3	0	0	0	0	0	0	0.5	0
Valdemolino	High	12	V_H_12	0	0	0	0	0	0	0	0	0	0.8	0	0	0	0	0	0	0	0	0	0	0	0	0	2	0.5	0	0.3	0.8	0	0.3	0	0	0	0	0	0	0	3	0	0	0	0	0	0	1.5	0.2
Valdemolino	High	13	V_H_13	0	0	0	0	0	0	0	0	0	0.8	0	0	0	0	0	0	0	0.2	0	4	1	0	0	0.8	0.8	0.3	0	0.8	0	0	0.2	0	0	0	0	0	0	2.5	0	0	0	0	0	0	0.8	0
Valdemolino	High	14	V_H_14	0	0	0	0.3	0	0	0	0	0	0.8	0	0	0	0	0	0	0	0	0	0	12	0	0	0	0	0	0	1.5	0	0	0.2	0	0	0	0	0	0	3	0	0	0	0	0	0	1	0
Valdemolino	High	15	V_H_15	0	0	0	0.3	0	0	0	0	0	0	0	0	0	0	0	0	0	0	0	0	8	0	0	3	0	0.2	0	0.8	0.8	0	0	0	0	0	0	0	0	2	0	0	0	0	0	0	0	0
Valdemolino	High	16	V_H_16	0	0	0	0	0	0	0	0	0	0	0	0	0	0	0	0	0	0.2	0	0	2	0	0	1	0	0	0.1	1	0.4	0.8	0.3	0	0	0	0	0	0	2.5	0	0	0	0	0	0	1.2	0
Valdemolino	High	17	V_H_17	0	0	0	0.3	0	0	0	0	0	0	0	0	0	0	0	0	0	0	0	0	6	0	0	3	0.5	0	0	1.5	0	0	0	0	0	0	0	0	0	2.5	0	0	0	0	0	0	0	0
Valdemolino	High	18	V_H_18	0	0	0	0.3	0	0	0	0	0	0	0	0	0	0	0	0	0	0	0	0	0	0	0	2.5	0	0	0	0.3	0	0	0	0	0	0	0	0	0	2	0	0	0	0	0	0	0.5	0
Valdemolino	High	19	V_H_19	0	0	0	0	0	0	0	0	0	0	0	0	0	0	0	0	0	0	0	0	5	0	0	5	0.3	0.2	0	1	0	0.4	0	0	0	0	0	0	0	3	0	0	0	0	0	0	1	0
Valdemolino	High	20	V_H_20	0	0	0	0	0	0	0	0	0	0.4	0	0	0	0	0	0	0	0	0	2	4	0	0	2	0	0	0	0.7	0	0.5	0	0	0	0	0	0	0	1	0	0	0	0	0	0	0.5	0
Valdemolino	High	21	V_H_21	0	0	0	0	0	0	0	0	0	0	0	0	0	0	0	0	0	0.2	0	0	0.8	0	0	2.5	3.5	0	0	0	2	0	0.3	0	2	0	0	0	0	1	0	0	0	0	0	0	2	0
Valdemolino	High	22	V_H_22	0	0	0	0	0	0	0	0	0	3	0	0	0	0	0	0	0	0	0	0	0.2	0	0	1.5	0.8	0	0.5	3	0	0	0.3	0	0	0	0	0	0	2	0	0	0	0	0	0	2	0
Valdemolino	High	23	V_H_23	0	0	0	0	0	0	0	0	0	1.5	0	0	0	0	0	0	0	0	0	0	8	0	0	3	0.8	0.8	0	0.5	0	0	0	0	0	0	0	0	0	3	0	0	0	0	0	0	1.5	0
Valdemolino	High	24	V_H_24	0	0	0	0.5	0	0	0	0	0	0	0	0	0	0	0	0	0	0	0	15	12	0	0	3	0.5	3	1	1	1	0	0	0	0	0	0	0	0	5	0	0	0	0	0	0.8	5	0.3
Valdemolino	High	25	V_H_25	0	0	0	1	0	0	0	0	0.8	0	0	0	0	0	0	0	0	0	0	0	10	0	0	1	0	0	0.5	0	0	0	0	0	0	0	0	0	0	3	0	0	0	0	0	0	0.2	0.8
Valdemolino	High	26	V_H_26	0	0	0	0	0	0	0	0	0	2	0	0	0	0	0	0	0	0	0	0	0	0	0	4	1	0	0	1.5	0	0.3	0	0	0	0	0	0	0	2	0	0	0	0	0	0	3	0
Valdemolino	High	27	V_H_27	0	0	0	0	0	0	0	0	0	3	0	0	0	0	0	0	0	0	0	0	3	0	0	4	3	0.5	0	1	0	0.3	0	0.3	0	0	0	0	0	3	0	0	0	0	0	0	1	0
Valdemolino	High	28	V_H_28	0	0	0	0.5	0	0	0	0	0	0.5	0	0	0	0	0	0	0	0.5	0	0	10	0	0	4	0.8	0	0.8	0.8	0	0	0	0	0	0	0	0	0	1.5	0	0	0.5	0	0	0	2	0
Valdemolino	High	29	V_H_29	0	0	0	1.5	0	0	0	0	0	10	0	0	0	0	0	0	0	0	0	0	20	0	0	2.5	0.3	0	1.5	0	0	0.2	0.8	0.1	0	0	10	0	0	0	0	0	0	0	0	0	2	0.8
Valdemolino	High	30	V_H_30	0	0	0	0	0	0	0	0	0	0	0.5	0	0	0	0	0	0	0.2	0	0	1.5	0	0	0.8	1	0	2	0.3	0.3	0	0	2.5	0	0	0	0	0	0	0	0	0	0	0	0	1	0
Valdemolino	High	31	V_H_31	0	0	0	0	0	0	0	0	0	2.5	0	0	0	0	0	0	0	0	0	0.5	3	0	0	1.5	1	1	1.5	0.5	1	0.2	0	0	0	0	0	0	0	1.5	0	0	0	0	0	0	1	0
Valdemolino	High	32	V_H_32	0	0	0	0	0	0	0	0	0	1	0	0	0	0	0	0	0	0	0.8	0	0	0	0	2	1	0	0	1.5	0	0	0	0.5	0	0	0	0	0	2.5	0	0	0	0	0	0	1.5	0
Valdemolino	High	33	V_H_33	0	0	0	0	0	0	0	0	0	0	0	0	0	0	0	0	0	0	0	2	15	0	0	0	0	0	0.7	0	0	0	0	0	0	0	0	0	0	2	0	0	0	0	0	0	2	0
Valdemolino	High	34	V_H_34	0	0	0	0	0	0	0	0	0	1	0	0	0	0	0	0	0	0	0	0	10	0	0	2.5	0.5	0	0	1	0	0	0	0	0	0	0	0	0	2	0	0	0	0	0	0	1	0
Valdemolino	High	35	V_H_35	0	0	0	0.2	0	0	0	0.6	0	0.5	0	0	0	0	0	0	0	0	0	0	4	0	0	3	0.3	1	0	0.8	0	0	0	0	0	0	0	0	0	3.5	0	0	0	0	0	0	0.8	0
Valdemolino	Medium	1	V_M_01	0	0	0	0	0	0	0	0	0	10	0	0	0	0	0	0	0	0	0.5	0	0	0	0	1.5	2.5	0.7	0.5	0	1.5	0	0	0	0	0	0	0	0	10	0	0	0	0	0	0	0	0
Valdemolino	Medium	2	V_M_02	0	0	0	0	0	0	0	0	0	4	0	0	0	0	0	0	1	0	1	1	4	0	0	3.5	1.5	0	0	0	1.5	0	0	0	0	0	0	0	0	10	0	0	0	0	0	0	0	0
Valdemolino	Medium	3	V_M_03	0	0	0	0	0	0	0	0	0	4	0	0	0	0	0	0	0	0	0	3	23	0	0	2.5	2.5	0	2.5	0.5	2	0	0	0	0	0	0	0	0	4	0	0	0	0	0	0.1	0	0.4
Valdemolino	Medium	4	V_M_04	0	0	0	0	0	0	0	0	0	2.5	0	0	0	0	0	0.2	0	0	0	4.5	0	0	0	2.5	2.5	0	0.8	1	2	0	0.3	2	0	0	0	0	0	0	0	0	0	0	0	0	0	0
Valdemolino	Medium	5	V_M_05	0	0	0	0	0	0	0	0	0	0	0	0	0	0	0	0	0	0	0	2.5	0	0	0	0.3	2	0	0.8	1.5	0	0	0.4	3	0	0	0	0	0	0	0	0	0	0	0	0	0	0
Valdemolino	Medium	6	V_M_06	0	0	0	0	0	0	0	0	0	0	0	0	0	0	0	0	0	0	0	0	0.1	0	0	0.8	1.5	0	1	1	2	0	0	0	0	0	0	0	0	0	0	0	0	0	0	0	0	0
Valdemolino	Medium	7	V_M_07	0	0	0	0	0	0	0	0	0	10	0	0	0	0	0	0.4	0	0	0	0	20	0	0	2.5	1	0	0.3	0	0	0	0	0	0	0	0	0	0	0.8	0	0	0	0	0	0	0.8	3
Valdemolino	Medium	8	V_M_08	0	0	0	0	0	0	0	0	0	6	0	0	0	0	0	0	0	0	0	0	0.1	0	0	1.5	2	0	2	2	1	0	0.7	4	0	0	0	0	0	0	0	0	0	0	0	0	0	0.3
Valdemolino	Medium	9	V_M_09	0	0	0	0	0	0	0	0	0	1.5	0	0	0	0	0	0	0	0	0	0	2	0	0	3	3	0	1	1	1.5	0	0	1.5	0	0	1	0	0	0	0	0	0	0	0	0	1	0.3
Valdemolino	Medium	10	V_M_10	0	0	0	0	0	0	0	0	0	2.5	0	0	0	0	0	0	0	0	0	0	0.5	0	0	1.5	2	0	1.5	0.8	1	0	0	2	0	0	0	0	0	0	0	0	0	0	0	0.1	2.5	0.1
Valdemolino	Medium	11	V_M_11	0	0	0	0	0	0	0	0	0	0	0	0	0	0	0	0	0	0	0	0	0.1	0	0	0.8	2	0	2	1.5	0.8	0	0	0	0	0	4	0	0	0	0	0	0	0	0	0.1	1	0
Valdemolino	Medium	12	V_M_12	0	0	0	0	0	0	0	0	0	0.5	0	0	0	0	0	0	0	0	0	0	8	0	0	2	1.5	0.8	1	1.5	2.5	0	0	0.5	0	0	0	0	0	0	0	0	0	0	0	0	1	0
Valdemolino	Medium	13	V_M_13	0	0	0	0	0	0	0	0	0	0	0	0	0	0	0	0	0	0	0	0	0.1	0	0	3.5	1.5	0	1.5	1	1	0	0	0	0	0	0	0	0	0	0	0	0	0	0	0	1.5	0
Valdemolino	Medium	14	V_M_14	0	0	0	0	0	0	0	0	0	2.5	0	0	0	0	0	0	0	0	0	0	0.5	0	0	1	2	0	1.5	0	1	0	0.3	0	0	0	0	0	0	0	0	0	0	0	0	0.8	0	0
Valdemolino	Medium	15	V_M_15	0	0	0	0	0	0	0	0	0	0	0	0	0	0	0	0	0	0	0	0	0	0	0	1.5	1.5	0	0.8	0.8	1	0	0.3	0	0	0	0	0	0	0	0	0	0	0	0	0	0	0.1
Valdemolino	Medium	16	V_M_16	0	0	0	0	0	0	0	0	0	2.5	0	0	0	0	0	0	0	0.2	0	0	0.2	0	0	2.5	1.5	0	1	1	1.5	0	0.4	1	5	0	4	0	0	0	0	0	0	0	0	0	0.3	0
Valdemolino	Medium	17	V_M_17	0	0	0	0	0	0	0	0	0	0	0	0	0	0	0	0	0	0.3	0	0	0	0	0	6	2.5	0	2	1	0	0	0	0	0	0	0	0	0	0	0	0	0	0	0	0.2	0.2	0.1
Valdemolino	Medium	18	V_M_18	0	0	0	0	0	0	0	0	0	2	0	0	0	0	0	0	0	0	0	0	1	0	0	4	3	0	1	0.8	1	0	0	0.8	0	0	0	0	0	0	0	0	0	0	0	0	0	0
Valdemolino	Medium	19	V_M_19	0	0	0	0	0	0	0	0	0	0	0	0	0	0	0	0	0	0.3	0	0	25.7	0	0	3	2.5	0	1	0.3	0	1	0.3	1	0	0	0	0	0	0	0	0	0	0	0	0	1	0
Valdemolino	Medium	20	V_M_20	0	0	0	0	0	0	0	0	0	0	0	0	0	0	0	0	0	0	0	0	3	0	0	3	1.5	0	2.5	0	0	1.2	0	4	0	0	0	0	0	4	0	0	0	0	0	0	0	0
Valdemolino	Medium	21	V_M_21	0	0	0	0	0	0	0	0	0	0	0	0	0	0	0	0	0	0	0	0	1.5	0	0	0.8	2	0	3	0.8	2	0	0	0	0	0	1.5	0	0	0	0	0	0	0	0	0	1	0
Valdemolino	Medium	22	V_M_22	0	0	0	0	0	0	0	0	0	3	0	0	0	0	0	0	0	0	0	0	10	0	0	3	2	0	2	1.5	0	0.5	0	0	0	0	0	0	0	1	0	0	0	0	0	0	2.5	0
Valdemolino	Medium	23	V_M_23	0	0	0	0	0	0	0	0	0	0	0	0	0	0	0	0	0	0	0	0	13	0	0	2.5	3	0	1	1	0	0	0	0	0	0	0	0	0	4	0	0	0	0	0	0.8	0	0
Valdemolino	Medium	24	V_M_24	0	0	0	0	0	0	0	0	0	5	0	0	0	0	0	0	0	0	1	0	0	0	0	2	2	0	0	0	0	0	0.3	0	0	0	0	0	0	4	0	0	0	0	0	0	2	0
Valdemolino	Medium	25	V_M_25	0	0	0	0	0	0	0	1.5	0	1.5	0	0	0	0	0	0	0	0.2	1.5	0	0	0	0	3.5	1.5	0	0	0.8	0	0	0	0	0	0	0	0	0	5	0	0	0	0	0	0	1.1	0
Valdemolino	Medium	26	V_M_26	0	1.5	0	0	0	0	0	1	0	0	0	0	0	0	0	0	0	0	3	0	1.5	0	0	4	1.5	0	0	0.8	0	0	0	0.7	0	0	0	0	0	5	0	0	0	0	0	0	0	0
Valdemolino	Medium	27	V_M_27	0	1	0	0	0	0	0	0	0	0	0	0.3	0	0	0	0	0	0.3	0	0	15	0	0	3.5	1	0	0	0	0	0	0	0	0	0	0	0	0	3.5	0	0	0	0	0	0	0	0
Valdemolino	Medium	28	V_M_28	0	0	0	0	0	0	0	0	0	4.5	0	0	0	0	0	0	0	0	0	0	0.2	0	0	0.5	2.5	0.6	0.8	0.8	0	0.8	0	1.5	0	0	0	0	0	1	0	0	0	0	0	0	0	0
Valdemolino	Medium	29	V_M_29	0	0	0	0	0	0	0	0	0	3.5	0	0	0	0	0	0	0	0.3	0	0	0	0	0	2	2.5	0.3	1	0.8	0.5	0	0	0.5	0	0	0	0	0	1	0	0	0	0	0	0	0	0
Valdemolino	Medium	30	V_M_30	0	0	0	0	0	0	0	0	0	4.5	0	0	0	0	0	0	0	0	0	4	0	0	0	2	1.5	0.5	0	2	2.5	0	0.7	0.5	0	0	0	0	0	0.8	0	0	0	0	0	0	3	0.4
Valdemolino	Medium	31	V_M_31	0	0	0	0	0	0	0	0	0	4	0	0	0	0	0	0	0	0.2	0	1.5	10	0	0	1.5	2	0	0	0.5	0.2	0	0.6	1.2	0	0	0	0	0	0	0	0	0	0	0	0	1	0
Valdemolino	Medium	32	V_M_32	0	0	0	0	0	0	0	0	0	2	0	0	0	0	0	0	0	0	1.5	0	10	0	0	1	2	0	0.8	0.3	0	0	0.4	0.8	0	0	0	0	0	1	0	0	0	0	0	0	0.8	0
Valdemolino	Medium	33	V_M_33	0	0	0	0	0	0	0	0	0	0	0	0	0	0	0	0	0	0.2	2.5	0	0	0	0	2.5	2.5	0.8	0	0.5	0	0	0	0	0	0	0	0	0	8	0	0	0	0	0	0	0	0
Valdemolino	Medium	34	V_M_34	0	0	0	0	0	0	0	0	0	2.5	0	0	0	0	0	0	0	0	0	0	2.5	0	0	0.2	2	0	0	0.8	0.8	0	0.9	0	0	0	0	0	0	0	0	0	0	0	0	0	0	0
Valdemolino	Medium	35	V_M_35	0	0	0	0	0	0	0	0	0	0	0	0	0	0	0	0	0	0.2	0	0	0	0	0	4.5	3	0	0	0	0	0	0	0	0	0	0	0	0	1	0	0	0	0	0	0.5	0	0
Valdemolino	Low	1	V_W_01	0	0	0	0	0	0	0	0	0	0.8	0	0	0	0	0	0	0	0	0	0.8	4	0	0	5	0.8	0.8	0.5	0	0.3	0	0	0	0	0	0	0	0	0	0	0	0	0	0	0.8	3	0
Valdemolino	Low	2	V_W_02	0	0	0	0	0	0	0	0	0	0.5	0	0	0	0	0	0	0	0.8	0	0	0.5	0	0	0.8	0	0	0.8	0	0.8	0	0	0	0	0	6	0	0	6	0	0	0	0	0	0	2.5	0
Valdemolino	Low	3	V_W_03	0	0	0	0	0	0	0	0	0	0	0	0	0	0	0	0	0	0	0	0	0	0	0	7	1	0	1.5	2	0	0	0	0	0	0	0	0	0	3.5	0	0	0	0	0	0.5	0	0
Valdemolino	Low	4	V_W_04	0	0	0	0	0	0	0	0	0	1.5	0	0	0	0	0	0	0	0.8	0	2.5	18	0	0	4	0.8	0	0.3	0	0	0	0	0	0	0	3	0	0	0	0	0	0	0	0	0.5	2.5	0
Valdemolino	Low	5	V_W_05	0	0	0	0	0	0	0	0	0	1	0	0	0	0	0	0	0	0	0	0	0.8	0	0	4	0.8	0	1.5	0	0.8	0	0	0	0	0	0	0	0	0	0	0	0	0	0	0.5	2	0
Valdemolino	Low	6	V_W_06	0	0	0	0	0	0	0	0	0	0.8	0	0	0	0	0	0	0.4	0.8	0	2.5	3	0	0	2.5	2	1.5	0	0.5	1	0	0	0	0	0	0	0	0	0	0	0	0	0	0	0.5	1	0
Valdemolino	Low	7	V_W_07	0	0	0	0	0	0	0	0	0	4	0	0	0	0	0	0	0	0	0	0	0	0	0	9	2	0	2	2	0.8	0	0	0	0	0	0	0	0	0	0	0	0	0	0	0.5	1	0
Valdemolino	Low	8	V_W_08	0	0	0	0	0	0	0	0	0	2	0	0	0	0	0	0	0	0	0	0	0	0	0	2.5	2.5	0	3	3	0.5	0	0	0	0	0	0	0	0	0	0	0	0	0	0	0	1	0
Valdemolino	Low	9	V_W_09	0	0	0	0	0	0	0	0	0	2	0	0	0.8	0	0	0	0	0.8	0	0	30	0	0	2.5	2	0	1.5	0.5	0	0	0.3	0	0	0	0	0	0	0	0	0	0	0	0	0	1.5	8
Valdemolino	Low	10	V_W_10	0	0	0	0	0	0	0	0	0	0	0	0	0	0	0	0	0	0	0	0	0	0	0	2.5	1.5	0	2	2	0.5	0	0	1	0	0	6	0	0	0	0	0	0	0	0	0	2.5	0.2
Valdemolino	Low	11	V_W_11	0	0	0	0	0	0	0	0	0	1	0	0	0	0	0	0	0	0	0	2.5	0.1	0	0	2.5	2	0	1.5	1.5	2	0	0	2.5	0	0	0.2	0	0	0	0	0	0	0	0	0	0	0
Valdemolino	Low	12	V_W_12	0	0	0	0	0	0	0	0	0	1	0	0	0	0	0	0	0	0	0	0	0.1	0	0	2.5	2	0	2	1	1	0	0.3	2	0	0	5	0	0	0	0	0	0	0	0	0	1	0
Valdemolino	Low	13	V_W_13	0	0	0	0	0	0	0	0	0	0.5	0	0	0	0	0	0	0	0.8	0	3.5	6	0	0	3	2.5	0.8	3	0.8	0.5	0	0	1	0	0	0	0	0	0	0	0	0	0	0	0.4	1.5	0
Valdemolino	Low	14	V_W_14	0	0	0	0	0	0	0	0	0	0	0	0	0	0	0	0	0.5	0.2	0	0	0	0	0	3	1.5	0	2.5	0	0	0	0	0	0	0	0	0	0	0	0	0	0	0	0	0	1	0
Valdemolino	Low	15	V_W_15	0	0	0	0	0	0	0	0	0	5	0	0	0	0	0	0	0	0	0	0	7	0	0	4	1	0	2	1	0.8	0	0	0	0	0	0	0	0	0	0	0	0	0	0	0.4	1.5	0.2
Valdemolino	Low	16	V_W_16	0	0	0	0	0	0	0	0	0	2	0	0	0	0	0	0	0	0	0	0	0	0	0	3.5	2.5	0	2.5	3	1.5	0	0	0	0	0	0	0	0	0	0	0	0	0	0	0	1	0
Valdemolino	Low	17	V_W_17	0	0	0	0	0	0	0	0	0	60	0	0	0	0	0	0	0	0	0	10	3	0	0	2.5	0.8	1	2	0	2.5	0	0	0	0	0	8	0	0	0	0	0	0	0	0	0.5	1	0
Valdemolino	Low	18	V_W_18	0	0	0	0	0	0	0	0	0	20	0	0	0	0	0	0	0	0	0	15	2	0	0	3	1.5	0.8	0	0.5	6	0	0	0	0	0	0	0	0	0	0	0	0	0	0	0	1	0
Valdemolino	Low	19	V_W_19	0	0	0	0	0	0	0	0	0	12	0	0	0	0	0	0	0	0.5	0	5	2.5	0	0	3	0	3	0	0	2.5	0	0	0	0	0	0	0	0	0	0	0	0	0	0	0	3	0
Valdemolino	Low	20	V_W_20	0	0	0	0	0	0	0	0	0	10	0	0	0	0	0	0	0	0.3	0	0	2	0	0	6	3	1	1.5	1	7	0	0	0	0	0	0	0	0	0	0	0	0	0	0	0	0	0
Valdemolino	Low	21	V_W_21	0	0	0	0	0	0	0	0	0	1.5	0	0	0	0	0	0	0	0	0	0	4	0	0	5	3	0	2	2	0	0	0	0	0	0	6	0	0	0	0	0	0	0	0	0.4	0.4	0
Valdemolino	Low	22	V_W_22	0	0	0	0	0	0	0	0	0	0.5	0	0	0	0	0	0	0	0	0	4	5	0	0	1	1.5	0	2.5	0	0	0	0	0	0	0	0	0	0	0	0	0	0.2	0	0	0.2	0.2	0
Valdemolino	Low	23	V_W_23	0	0	0	0	0	0	0	0	0	5	0	0	0	0	0	0	0	0	0	15	4	0	0	0	1.5	0	2	0	0	0	0.3	0	0	0	0	0	0	0	0	0	0	0	0	0.2	1.5	0.2
Valdemolino	Low	24	V_W_24	0	0	0	0	0	0	0	0	0	2.5	0	0	2	0	0	0	0	0	0	1.5	0.1	0	0	2	2	0	3	0.8	1	0	0	0	0	0	0	0	0	0	0	0	0	0	0	0.2	3	0
Valdemolino	Low	25	V_W_25	0	0	0	0	0	0	0	0	0	2	0	0	0	0	0	0	0	0	0	0.5	0	0	0	6	1.5	0	3	2	0.5	0	0	1.5	0	0	0	0	0	0	0	0	0	0	0	0	0	0
Valdemolino	Low	26	V_W_26	0	0	0	0	0	0	0	0	0	4.5	0	0	0	0	0	0	0	0	0	0	0.1	0	0	5.5	2.5	0	4	3.5	1.5	0	0	0	0	0	0.1	0	0	0	0	0	0	0	0	0	0	0
Valdemolino	Low	27	V_W_27	0	0	0	0	0	0	0	0	0	10	0	0	0	0	0	0	0	0.5	0	1.5	20	0	0	4	1	3	1	0	0.8	0	0	0	0	0	0	0	0	0	0.1	0	0	0	0	0.5	2.5	0
Valdemolino	Low	28	V_W_28	0	0	0	0	0	0	0	0	0	3.5	0	0	0	0	0	0	0	0.3	0	0	3	0	0	8	4	1	0	0	0	0	0	0	0	0	0	0	0	0	0	0	0	0	0	0	1	0
Valdemolino	Low	29	V_W_29	0	0	0	0	0	0	0	0	0.1	35	0	0	0	0	0	0	0	0	0	2	40	0	0	2.5	0.3	2	0	0	0	0	0	0	0	0	0	0	0	0	0	0	0	0	0	0.2	0	0
Valdemolino	Low	30	V_W_30	0	0	0	0	0	0	0	0	0	0	0	0	0	0	0	0	0	0	0	1	0.8	0	0	1	2	0	1.8	2	0.2	0	0	0	0	0	2	0	0	0	0	0	0	0	0	0.2	0	0
Valdemolino	Low	31	V_W_31	0	0	0	0	0	0	0	0	0	5	0	0	0	0	0	0	0	0	0	10	30	0	0	1	2	0	0.3	0	0.5	0	0	0	0	0	0	0	0	0	0	0	0	0	0	0.3	0.8	0
Valdemolino	Low	32	V_W_32	0	0	0	0	0	0	0	0	0	10	0	0	0	0	0	0	0	0	0	0	0	0	0	0.6	2	1	4	0.8	0.4	0	0	1	0	0	0	0	0	0	0	0	0.2	0	0	0.2	1.5	0
Valdemolino	Low	33	V_W_33	0	0	0	0	0	0	0	0	0	1	0	0	0	0	0	0	0	0	0	0	0	0	0	0.2	2	0	3	0.5	0.3	0	0	1.8	0	0	2	0	0	0	0	0	0.8	0	0	0	0.5	0.1
Valdemolino	Low	34	V_W_34	0	0	0	0	0	0	0	0	0.4	1	0	0	0	0	0	0	0	0.2	0	0	7	0	0	1	1	0.4	2.8	0	0.8	0	0.1	0.8	0	0	0.5	0	0	0	0	0	0	0	0	0	1	0
Valdemolino	Low	35	V_W_35	0	0	0	0	0	0	0	0	0	0.3	0	0	0	0	0	0	0	0	0	0	0	0	0	0.5	2	0.5	5	0	0.2	0	0	3.5	0	0	0	0	0	0	0.1	0	0	0	0	0.8	0.5	0
[truncated: 6 more columns]

## Sheet: vegetation_data_5%
locality	grazing	plot	ID	ArtHer	AstInc	AtrHum	BraRet	DacGlo	DipSer	EchRit	GenSco	GypStr	HelSqu	HelSyr	HelVio	HelSto	HerFru	KoeVal	LauFra	LauPum	LinSuf	LygSpa	OnoTri	PlaAlb	RosOff	SedSed	SidFru	SonTen	StiLag	StiPar	TeuCap	ThyVul	ThyZyg
Hoyo	High	1	H_H_01	0	0	0	0.8	0	0	0	3	6	1.5	0.2	0	1	0.8	0.8	0	0	2.5	0	0	0	0	0	0.2	0	0	0	0	1	0
Hoyo	High	2	H_H_02	0	0	0	2.5	0	0	0	2	0	1	1.5	0	1	0.8	2.5	0	0	2	0	0	0	0	0	0.8	0	0	0	0.5	1	0
Hoyo	High	3	H_H_03	0	0	0	2.5	0	0	0	2	0	2	0.8	0	1	1	0.8	0	0	2	0	3	0	0	0	0.8	0	0	0	0.4	0.8	0
Hoyo	High	4	H_H_04	0	0	0	0.5	0	0	0	2	2	3	0.8	0	0.1	0.2	0	0	0	0.8	0	0	0	0	0	0	0	0	0	0	3	0
Hoyo	High	5	H_H_05	0	0	0	3.5	0	0	0	0.5	1	2	0.8	0	1	0.5	1.5	0	0.3	1	0	0.1	0	0	0	0	0	0	0	0.8	1	0
Hoyo	High	6	H_H_06	0	0	0	0.5	0	0	0	3	0	0.8	1	0	1	0.5	1	0	0	2	0	5	0	0	0	0.3	0	0	0	0	0	0
Hoyo	High	7	H_H_07	0	0	0	0	0	0	0	0	0	0.3	0.8	0	1	0.8	0.5	0	0	4.5	0	0	0	0	0	0	0	0	0	0	0.5	0
Hoyo	High	8	H_H_08	0	0	0	12	0	0	0	0	0	1.5	1.5	0	1.5	2	2	0	0.2	1	0	0	0	0	0	0.3	0	0	0.5	0.8	0.5	0
Hoyo	High	9	H_H_09	0	0	0	4	0.2	0	0	2	8	4	1	0	1	1.5	0.8	0.2	0.2	3.5	0	0	0	0	0	6	0	0	0	0.8	1	0
Hoyo	High	10	H_H_10	0	0	0	3	0	0	0	0	12	3	0.5	0	1	2	1	0	0	0.8	0	0	3	0	0	3	0	0	0	1	0.5	0
Hoyo	High	11	H_H_11	0	0	0	2	0	0	0	0	2	2	1	0	1.5	2	1	0.2	0.2	0	0	0	1.5	0	0	2.5	0	0	0	0.2	0.3	0
Hoyo	High	12	H_H_12	0	0	0	4	0	0	0	0	0	1	1.5	0	1.5	1.5	1.5	0	0.5	3.5	0	0	0	0	0	3	0	0	0	1.5	2	0
Hoyo	High	13	H_H_13	0	0	0	0	0	0	0	0	2.5	4	0	0	1	3	0.8	0	0	0	4	0	2	0	0	0.8	0	0	0	1	0.8	0
Hoyo	High	14	H_H_14	0	0	0	12	0	0	0	0	0	5	0.4	0	0.3	4	0	0.8	0.2	1.5	0	0	1.5	0	0	2	0	0	0	1	3.5	0
Hoyo	High	15	H_H_15	0	0	0	4	0	0	0	0	5	3.5	0.6	0	0.5	1	0.8	0.5	0	0.4	0	0	3	0	0	2.5	0	0	0	0	0.8	0
Hoyo	High	16	H_H_16	0.1	0	0	0	0	0.1	0	0	0.5	5	0.4	0	0	1.5	1	0	0	0.5	0	0	12	0	0	0.8	0	0	1	0	1	0
Hoyo	High	17	H_H_17	0	0	0	1.5	0	0	0.3	0	0.4	4	0.5	0	1	2	2	0	0.3	0.3	0	0	2.5	0	0	1.5	0	0	0.5	0.8	1.5	0
Hoyo	High	18	H_H_18	0	0	0	10	0	0	0	0	0.5	5	0.8	0	0.8	2	1.5	1	0	0	0	0	2	0	0	2	0	0	0	0.6	0.8	0
Hoyo	High	19	H_H_19	0	0	0	0	0	0	0.5	0	0	3	0.8	0	0.8	1	1	0	0	0	0	0	0.8	0	0	3	0	0	1	0	1.5	0
Hoyo	High	20	H_H_20	0	0	0	1	0	0	0	0	0	0.5	0.8	0	0.7	1	0.8	0	0	0	0	0	0.8	0	0	1.5	0	0	0	0.5	1	0
Hoyo	High	21	H_H_21	0	0	0	0	0	0	0	0	0	4	2	0	1.5	4	1.5	0	0	3.5	0	2	2.5	0	0	0.7	0	0	0	0	2	0
Hoyo	High	22	H_H_22	0	0	0	1.5	0	0	0	0	12	12	0.5	0	0.5	3	0	1	0	0.2	3.5	0	3	0	0	10	0	0	0	1.5	0.5	0
Hoyo	High	23	H_H_23	0	0	0	0	0	0	0	0	0	1	0.2	0	1	0.5	0	0	0	0.5	0	0	0.2	0	0	0	0	0	0	0.8	1	0
Hoyo	High	24	H_H_24	0	0	0	0	0	0	0	0	0	2	0.5	0	1.5	1	0	0	0	0	0	4	1.5	0	0	0	0	0	0	0	0.5	0
Hoyo	High	25	H_H_25	0	0	0	4.5	0	0	0	0.3	6	3	1	0	2	1.5	1.5	0	0.8	2	0	0	0.5	0	0	0.5	0.1	0	0.5	1	0.8	0
Hoyo	High	26	H_H_26	0	0	0.2	8	0	0	0	0	0	5	1	0	2	2	1	0	0.2	1	1.5	0	1	0	0	1.5	0	0	0	1	1	0
Hoyo	High	27	H_H_27	0	0	0	4	0	0	0	0	0	4	1.5	0	2	2	2.5	0	0.8	0.5	0	0	2.5	0	0	1	0	0	0	1	1.5	0
Hoyo	High	28	H_H_28	0	0	0	0	0	0.5	0	0	0	4	1	0	2	1.5	1.5	0	0.5	5	0	0	0	0	0.5	0	0	0	0	0.5	0	0
Hoyo	High	29	H_H_29	0	0	0	3.5	0	0	0	2	0	8	1	0	0.8	2	1	0	0.3	1	0	3	8	0	0	2	0	0	0.5	0	1	0
Hoyo	High	30	H_H_30	0	0	0	1	0	0	0	4	0.5	2	1.5	0	0.5	1	1.5	0	0	1.5	0	0	0.5	0	0	0.7	0	0	0	0.6	1	0
Hoyo	High	31	H_H_31	0	0	0	0.8	0	0	0	0.5	0	2.5	1.5	0	0.8	1.5	1	0	0	1	0	0	3	0	0	1	0	0	0	0.8	0	0
Hoyo	High	32	H_H_32	0	0	0	0	0	0	0	0	6	1	1	0	1	1	1	0	0	1	0	0	0	0	0	1	0	0	0	0.5	1	0
Hoyo	High	33	H_H_33	0	0	0	1	0	0	0	0.8	0	2	0.8	0	1	1.5	2	0	0.3	2	0	5	1.5	0	0	1.2	0	0	0.3	1	1	0
Hoyo	High	34	H_H_34	0	0	0	1.2	0	0	0	0.3	0	0.3	1	0	1	0.8	1.5	0	0.2	2.5	0	0	0	0	0	0.5	0	0	0.5	0.2	1	0
Hoyo	High	35	H_H_35	1	0	0	10	0	0	0	0	3	10	1	0	1.5	1.5	0.8	0.5	0.5	0	0	0	0.8	0	0	1	0.2	0	0	1	0.5	0
Hoyo	Medium	1	H_M_01	0	0	0.8	0	0	0	0	0	0	2	1	0	1.5	1	0.3	0	0	0.8	0	8	0.8	0	0	0.8	0	0	2	0.8	1	0
Hoyo	Medium	2	H_M_02	0	0	0.5	2	0	0	0	0	15	2.5	1.5	0	0	1	1.5	0	0	0.5	4	0	3	0	0	0.8	0	0	4	0	1	0
Hoyo	Medium	3	H_M_03	0	0	0.5	5	0	0	0	1	3	4	1.5	0	0	3	2	0	0	0.5	1.5	0	4	0	0	1.2	0	0	0.5	0	1.5	0
Hoyo	Medium	4	H_M_04	4	0	0	1.5	1	0	0	0	10	10	0	0	0	1	2	0	0	0	0	0	8	0	0	0.3	0	0	5	0	1.5	0
Hoyo	Medium	5	H_M_05	0	0	1	5	0.8	0	0	0	5	2.5	1.5	0.3	0.5	2	0.5	0	0	0	0	6	4	0	0	1.5	0	0	4	0	0.5	0
Hoyo	Medium	6	H_M_06	0	0	0	0.8	0.8	0	0	0	0	2	1	0.3	0.5	2.5	1	0	0.2	0	10	5	2	0	0	0	0	0	4	0.2	0.5	0
Hoyo	Medium	7	H_M_07	0	0	0	0	0	0	0	3	0	2.5	0.5	0.3	1.2	1	1	0	0	3	0	0	0	0	0	0	0	0	0.6	0	1.5	0
Hoyo	Medium	8	H_M_08	0	0	1.5	7	0	0.2	1	0.8	0	1	1.5	1	0.8	1	1.5	0.5	0.8	1	0	0	1	0	0	1.5	0	0	2.5	1.5	1	0
Hoyo	Medium	9	H_M_09	0	0	0.2	4	0.5	0	0.8	6	1.5	2.5	1.5	1	1	0.5	0.8	0	0	10	0	20	0	0	0	0	0	0	2	0.8	3	0
Hoyo	Medium	10	H_M_10	0	0	0.5	4	0	0	0	0	0.1	2	1	1.5	1	0	0.8	0	0	0	0	0	4	0	0.2	1.5	0	0	2	0	1	0
Hoyo	Medium	11	H_M_11	0	0	0	5	1	0	0.4	8	50	0	0	2	1.5	0	0.8	0	0	0	0	10	0	0	0	2	0	0	3	0	3	0
Hoyo	Medium	12	H_M_12	0	0	0	4	0	0	1	0	1	3.5	0	0.4	0	0.5	0.5	0.5	0	1	0	0	1.5	0	0.2	0.8	0	0	1	0.5	1	0
Hoyo	Medium	13	H_M_13	0	0	0	3	0	0	2	0	0	5	0	0	0.5	1	0.4	0.5	0	0.4	0	0	2.5	0	0	0.5	0	0	2.5	0.5	0.5	0
Hoyo	Medium	14	H_M_14	0	0	0	0	0	0	0.3	0	2	2	0.8	0	0.2	0.5	1	1.5	0	0	0	0	2	0	0	0.5	0	0	2.5	0	0.5	0
Hoyo	Medium	15	H_M_15	0	0	0	0.5	0.2	0	0	6	0.2	1.5	2	2	0	1	1.5	0	0	0.8	0	0	3	0	0	2	0	0	4	1.5	2.5	0
Hoyo	Medium	16	H_M_16	4	0	0	0	0	0	0	0	25	1.5	1	0.5	0	0	0	0	0	0	0	15	4	0	0	0	1	0	8	0	1	0
Hoyo	Medium	17	H_M_17	0	0	0	0	0	0	0	0	0	1	0.5	0	0.2	0.5	0	0	0	0	0	0	0	0	0	0.3	0	0	0.5	0	0	0
Hoyo	Medium	18	H_M_18	0	0	0	0	0	0	0	0	0.1	3	0.8	0	1.5	1	1	0.4	0	0	0	0	2	0	0	3	0	0	4	0.8	1.5	0
Hoyo	Medium	19	H_M_19	0	0	0	0	0.5	0	0	2.5	12	3.5	1.5	0	1	0.5	0	0	0.5	0.5	0	0	1	0	0	1.2	0	0	4	0	0.5	0
Hoyo	Medium	20	H_M_20	0.2	0	0	0	0	0	0	0	0.2	6	0.8	0	0	1.5	1	0	0	0.2	0	0	1.5	0	0	0.3	0	0	2	0.8	1	0
Hoyo	Medium	21	H_M_21	0	0	0.5	3.5	0	0	0.5	0	0	4	0	1	0	2	0	0.8	0	0	0	0	25	0	0	0.8	0	0	2	0	0.2	0
Hoyo	Medium	22	H_M_22	0	0	0	3	0	0	0	0	2	4	0	0	0.3	4	0.2	0	0	0	0	0	1.5	0	0	0.8	0	0	1	0	4	0
Hoyo	Medium	23	H_M_23	0	0	0	0	0	0	0	0	0.3	6	0.5	0	0	3.5	0.5	0	0	0	3.5	0	0.8	0	0	0.8	0	0	0	0	4	0
Hoyo	Medium	24	H_M_24	0	0	0	0	0	0	0	0	0.2	3.5	0.3	0	0.8	0	0.5	0	0	0	3	0	2	0	0	1.5	0	0	3	0	3	0
Hoyo	Medium	25	H_M_25	0	0	0.5	12	0	0	2.5	0	0	4	0.8	1.5	0	1.5	4	0	0.3	0	0	0	8	0	0	0.8	0	0	1	0.4	1.5	0
Hoyo	Medium	26	H_M_26	0	0	0.8	7	0	0	2	0	3.5	5	0.8	0.5	0.4	1	2	0.5	0.3	0	0	0	2.5	0	0	0	0	0	1.5	0	3.5	0
Hoyo	Medium	27	H_M_27	0	0	0	0.8	0	0	1	0	40	4	0	0	0.5	0	0.8	0	0	0	0	0.2	3.5	0	0	0	1	0	3	0	1.5	0
Hoyo	Medium	28	H_M_28	0.5	0	0	2.5	0	0	0.8	0	0	8	0	0	0	0	2	0	0	0	0	3	10	0	0	0.5	0	0	4	0.3	0	0
Hoyo	Medium	29	H_M_29	0	0	0.4	10	0	0	0	0	0	3	0.3	0	0	0.5	3	0	0	0.8	0	0	4	0	0	0	0	0	0	0	1.5	0
Hoyo	Medium	30	H_M_30	0	0	0	3	0	0	0	0	0	12	0.8	0	0.3	2.5	0.7	0	0	0	0	0	1	0	0	0	0	0	0	0	5	0
Hoyo	Medium	31	H_M_31	0	0	1.5	3	0	0	0.5	2.5	5	8	1.5	0.8	0.2	1.5	0.5	0	0	3	0	0	2.5	0	0	0.6	1	0	0.8	0	1.5	0
Hoyo	Medium	32	H_M_32	0	0	1	7	0	0	0.8	0	3	3	0	0.5	0	0.8	1	0	0.3	0	0	2.5	5	0	0	0	0	0	0.5	0	0	0
Hoyo	Medium	33	H_M_33	0	0	0	1.5	0	0	0	0	0.1	7	0	0.8	0	1.5	0.8	0.5	0	0	0	2	3.5	0	0	0.8	0	0	0.8	0.2	1	0
Hoyo	Medium	34	H_M_34	0	0	0	0	0	0	0	0	4	3.5	0	0	0.5	1.5	0.8	0	0	0	5	0	1.5	0	0	0	0	0	0	0	0.5	0
Hoyo	Medium	35	H_M_35	0	0	0	4	0	0	0	0	0.1	3.5	1	0.8	0.5	2.5	0	0.8	0.3	0	0	0	1.5	0	0	2.5	0	0	0.3	0	0.8	0
Hoyo	Low	1	H_W_01	0	0	0.8	4	3	0.2	8	0	0	0.5	0	8	0	0	0	0	0	0	0	0	0	1.5	0	0	0	3	0	0	0.8	0
Hoyo	Low	2	H_W_02	1.5	0	1.5	10	0.5	0.5	1.5	0	0	1	0.8	5	0	0	1.5	0	0	0	0	0	4	0	0	0	0	0.8	0	0	0.8	0
Hoyo	Low	3	H_W_03	0	0	0	0	0	0	1.5	0	0	4	1	2	0	0	0.5	0	0	0	0	0	0	4	0	0	0	0.5	0	0	0	0
Hoyo	Low	4	H_W_04	0	0	0	0	1.5	0	0	7	0	0	0.8	2.5	0	0	0	0	0	0	0	0	0	55	0	0	0	0	0	0	0.8	0
Hoyo	Low	5	H_W_05	0	0	0	0	0	0	0	5	0	0.8	1	0	0	0	0.5	0	0	0	0	0	0	3	0	0	0	0	0	0	0	0
Hoyo	Low	6	H_W_06	0	0	0	0	0	0	0	0	0	0.3	2	0	0	0.4	0.4	0	0	1.5	0	0	0	25	0	0	0	0	0	0	0.4	0
Hoyo	Low	7	H_W_07	0	0	0	0	0	0	0	3	0	0.5	1.5	0	0.3	0.3	0	0	0	0.6	0	0	0	3	0	0	0	0	0	0.5	0.3	0
Hoyo	Low	8	H_W_08	0	0.4	0	0	0.8	0	0	3	0	0.5	2.5	1.5	0	0	2	0	0	0	0	0.1	0	35	0	0	0	0	0	1	0	0
Hoyo	Low	9	H_W_09	0	0	1	1.5	0.5	0.2	0.8	1.5	0	0	0.8	3	0	0	1.5	0	0	0	0	0	0	15	0	0	0	0	0	0	0.8	0
Hoyo	Low	10	H_W_10	0	0	0	0.8	0.3	0.2	1.5	2.5	0	0	0.8	2	0	0	0.4	0	0	0	0	0.2	0	14	0	0	0	0	0	0	0.4	0
Hoyo	Low	11	H_W_11	0	0	0	0	0	0	0	0	0	0.3	1	1	0.4	0	0.8	0	0	0	0	0	0	7	0	0.4	0	0	0	0	0.8	0
Hoyo	Low	12	H_W_12	0	0	0	0.5	0	0	0	1.5	0.2	0.3	1	1.5	0	0.8	0.5	0	0	0	0	0	0	28	0	0	0	0	0	0	0.8	0
Hoyo	Low	13	H_W_13	0	0	0	8	0	0.4	0	0.8	0	0.8	0	3.5	0	0	0.5	0	0	0	0	0	0	28	0	0	0	0	0	0	1	0
Hoyo	Low	14	H_W_14	0	0	0	2.5	0	0.5	0	0	0.2	0.2	0	0.5	0.2	0	1.5	0	0	0	0	0	0	48	0	0	0	0	0	0	1.5	0
Hoyo	Low	15	H_W_15	0	0	0	0	0	0	0	1	4	1	1.5	0	0	0	0.8	0	0	0	0	0	0	10	0	0	0	0	0	0	0.8	0
Hoyo	Low	16	H_W_16	0	0	0	0	0	0	0	0	0.1	0.5	1.5	0	0	0	0.5	0	0	1	0	0	0	20	0	0	0	0	0	0.4	0.8	0
Hoyo	Low	17	H_W_17	0	0	0	0	0	0	0	2	0.1	0.3	1.5	0	0	0.7	0.3	0	0	0	0	3	0	7	0	0	0	0	0	0.5	0	0
Hoyo	Low	18	H_W_18	0	0	0	0	0	0	0	1.2	0	0.8	1	1	0	0.4	0.2	0	0	0.2	0	0	0	10	0	0	0	0	0	0	0	0
Hoyo	Low	19	H_W_19	0	0	0	0.2	0	0	0	0	3.5	0.8	1	0.8	0	0.5	0	0	0	0	0	0	0	12	0	0	0	0	0	0	0	0
Hoyo	Low	20	H_W_20	0	0	0	0	0	0	0	3.5	0	1.5	1	0	0	1.5	0	0	0.2	0	0	0	0	3	0	0	0	0	0	0	1	0
Hoyo	Low	21	H_W_21	0	0	0	0	0	0	0	1.5	0	1.5	1.5	0.8	0.2	0.5	0.4	0	0	0.5	0	0	0	16	0	0	0	0	0	0.3	0.7	0
Hoyo	Low	22	H_W_22	0	0	0	0	0	0	0	0	0	1	1.5	0.5	0	0.4	0.5	0	0	0	0	0	0	12	0	0	0	0	0	2	0.8	0
Hoyo	Low	23	H_W_23	0	0	0	0	0	0	0	1	0	3	1	0.8	0	1	0	0	0	1.5	0	0	0	28	0	0	0	0	0	1	0.6	0
Hoyo	Low	24	H_W_24	0	0	0	0	0	0	0	7	0	1.5	1.5	0	0.3	0.4	0.5	0	0	0	0	0	0	4	0	0	0	0	0	0	0	0
Hoyo	Low	25	H_W_25	0	0	0	0	0	0.5	0	0	0	2	1	0.7	0	0	0	0	0	0	0	0	0.8	8	0	0	0	0	0	0	1.5	0
Hoyo	Low	26	H_W_26	0	0	0	1	0	0.2	0	0.5	0	1.2	1.2	0.4	0	0.4	0	0	0	0.3	0	0	0	0	0	0	0	0	0	0	0	0
Hoyo	Low	27	H_W_27	0	0	0	0	0	0	0	0	0	0.6	1	0.3	0.2	0	0.3	0	0	1.5	0	0	0	5	0	0	0	0	0	0.4	0.4	0
Hoyo	Low	28	H_W_28	0	0	0	0	0	0	0	1	0	1	1	0.8	0	0.8	0.4	0	0	0	0	0	0	5	0	0	0	0	0	0.3	1	0
Hoyo	Low	29	H_W_29	0	0	0	0.5	0	0	0	1	0	0.3	1	1	0.2	0.5	0.2	0	0	0	0	0	0	32	0	0	0	0	0	0	0	0
Hoyo	Low	30	H_W_30	0	0	0	1	0	0.3	0	0	0.1	1.5	1	1.5	0	0	0.8	0	0	0	0	0	0	22	0	0	0	0	0	0.5	0	0
Hoyo	Low	31	H_W_31	0	0	0	0	0	0	0	1.5	0	0.1	1.5	1.5	0	0	0.8	0	0	0	0	0	0	15	0	0	0	0	0	0.3	0.5	0
Hoyo	Low	32	H_W_32	0	0	0	0	0	0.2	0	6	0	1	2	1	0	0	0.3	0	0	0	0	0	0	8	0	0	0	0	0	0	1	0
Hoyo	Low	33	H_W_33	0	0	0	0	0	0	0	0	0.1	0	0.5	0.8	0	0	0	0	0	0	0	0	0	6	0	0	0.1	0	0	0.3	1	0
Hoyo	Low	34	H_W_34	0	0	0	0	0	0	0	1	0	0.8	1	1	0	0	0	0	0	0	0	0	0	15	0	0	0	0	0	0	0.5	0
Hoyo	Low	35	H_W_35	0	0	0	1	0	0	0	2	0	0	1	0.3	0	0.3	0	0	0	0	0	0	0	6	0	0	0	0	0	0	0.3	0
Pedriza	High	1	P_H_01	0	0	0.5	3	0	0	0	0	0	0	0	0	0	2	0	0	0.5	0	0	0	8	0	0	0	0	0	1	0	0	0
Pedriza	High	2	P_H_02	0	0	0	0	0	0.5	0	0	5	0	0	0	0	1	2	0	0	0	0	0	1	0	0	0	0	0	2	0	0	0
Pedriza	High	3	P_H_03	0	0	0	1	0	0	0	0	5	0	0	0	0	1.5	0	0	0	0	0	0	5	0	0	0	0	0	1.5	0	0	0
Pedriza	High	4	P_H_04	0	0	0	2	0	0	0	0	5	0	0	0	0	3	0	0	0	0	0	0	10	0	0	1.5	0	0	3	0	0	0
Pedriza	High	5	P_H_05	0	0	0.5	12	0	0.2	0	0	6	0	0	0	0	2	0	0	1.5	0	0	0	10	0	0	3	0	0	1	0	0	0
Pedriza	High	6	P_H_06	1.5	0	0	8	0	0	0.8	10	8	0.8	0	0.9	0	2	0.8	0	0.8	0	0	0	15	0	0	6	0	0	5	0.5	0	0
Pedriza	High	7	P_H_07	8	0	0	0	0.5	0	0	0	2	0	0	0	0	1	0	0	3	0	0	0	12	0	0	0	0	0	1.5	0.5	0	0
Pedriza	High	8	P_H_08	0.2	0	0	5	0.2	0.2	0	0	8	0	0	0	0	5	0.2	0	0.8	0	0	0	12	0	0	1	0	0	2	0	0	0
Pedriza	High	9	P_H_09	0	0	0	3	0	0	0	0	0	0	0	0	0	4	0	1	0	0	2	0	15	0	0	0	0	0	0	0	0	0
Pedriza	High	10	P_H_10	0	0	0	3	0	0	0	0	0	0	0	0	0	5	0	0	0	0	1	0	5	0	0	0.8	0	0	2	0	0	0
Pedriza	High	11	P_H_11	0	0	0	8	0	0	0	0	3	0	0	0	0	4	1	1	0	0	0	0	8	0	0	2	0	0	1.5	2.5	0	0
Pedriza	High	12	P_H_12	0.2	0	0	6	0	0	0	0	0	0.2	0	0.2	0	3	1	0.2	0.2	0	0	0	12	0	0	2.5	0	0	1.5	0.9	0	0
Pedriza	High	13	P_H_13	0	0	0.2	3	1	0	1.5	0	0	0.4	0	3	1	4	3	0	0	0.8	0	0	16	0	0	0	0	0	5	1.5	0	0
Pedriza	High	14	P_H_14	1	0	0	7	0	0	2.5	0	2	0	0	0.8	0	2	0	0	0.2	0	0	0	6	0	0	2	0	0	0.8	0	0	0
Pedriza	High	15	P_H_15	0	0	0	0.8	0	0	0	0	0.8	0	0	0.8	0	1.5	1.5	0	1.5	2	0	2	1	0	0	0.5	0	0	0.5	0	0	0
Pedriza	High	16	P_H_16	0	0	0.5	2	0	0	1	0	1.5	0	0	0	0	3	0.5	0	0.6	0	0	0	9	0	0	0.8	0	0	2	0	0	0
Pedriza	High	17	P_H_17	0	0	0.2	4	0	0	0.8	0	8	0	0	0	0	4	0	0	0	0	0	0	10	0	0	0	0	0	1	0	0	0
Pedriza	High	18	P_H_18	0	0	0	0	0	0	0	0	2	0	0	0	0	1	1	0	2	0	0	0	1	0	0	1	0	0	0	0	0	0
Pedriza	High	19	P_H_19	5	0	0	0	0	0	1	0	0	0	0	0	0	0.8	0	0	0	0	0	0	6	0	0	1	0	0	0.8	0	0	0
Pedriza	High	20	P_H_20	1	0	0	0.8	0	0	0	0	8	3	0	0	0.5	2.5	0	0	0.5	0	0	0	2	0	0	3	0	0	0.5	0	0	0
Pedriza	High	21	P_H_21	10	0	0.8	0.2	0	0	1	0	0	0	0	0.8	0	3	1	0	0	0	0	0	15	0	0	0	0	0	10	0.3	0	0
Pedriza	High	22	P_H_22	0	0	0	0	0	0.1	0	0	10	0	0	1	0	4	0	0	0.5	0	0.8	0	3	0	0	1	0	0	0	0	0	0
Pedriza	High	23	P_H_23	0	0	0	0	0	0	0	0	0	2	1	0.4	0	3	0	0	0	0	0.8	0	2	0	0	3	0	0	0.1	0	0	0
Pedriza	High	24	P_H_24	3	0	0	1.5	0	0	0	4	0	7	0.9	1	0	1.2	0	0.2	0.2	0	0.7	0	8	0	0	9	0	0	2	0.8	0	0
Pedriza	High	25	P_H_25	0	0	0	0	0	0.2	0	0	2	3	0	0.5	0	10	0	0	0	0	0.5	0	4	0	0	0.5	0	0	0	1	0	0
Pedriza	High	26	P_H_26	1.5	0	0	0	0	0.1	0	0	0	10	0	0	0	0.8	0.1	0	0.8	0	12	0	0	0	0	0	0	0	0	0	0	0
Pedriza	High	27	P_H_27	5	0	0.1	0	0	0.1	0	0	0.5	0.5	0	0	0	3	0	4	0	0	1	0	2	0	0	0	0	0	0	0	0	0
Pedriza	High	28	P_H_28	20	0	0	0	0	0.5	0	0	0	1	0	0.1	0	0	0	0	0	0	4	0	0	0	0	0	0	0	0	0	0	0
Pedriza	High	29	P_H_29	0	0	0	0	0	0	0	0	10	0.1	0	0.1	0.1	1	0	0	0	0	0	0	3	0	0	2	0	0	0.5	0	2	0
Pedriza	High	30	P_H_30	0	0	0	4	0	0	0	0	0	2	0	0	0.8	4	0	0	0	0	0	0	4	0	0	3	0	0	0	2	2	0
Pedriza	High	31	P_H_31	0	0	0	0	0	0	0	10	2	2	2	1.5	0	1	0.5	0	0	4	0	0	2	0	0	2	0	0	1.5	1	1	0
Pedriza	High	32	P_H_32	0	0	0	4	0	0	0	0	8	0.8	0	0.8	0	3	0.8	0	0.3	0.8	0	5	2	0	0	2	0	0	0.8	0.2	1	0
Pedriza	High	33	P_H_33	3	0	0.1	2	0	0.1	0	0	0	0.2	0	0.8	0	3	0	0	0	0	0	0	12	0	0	0.2	0	0	4	0	0	0
Pedriza	High	34	P_H_34	0	0	0.3	0.8	0	0	0	0	0.3	0	0	0.1	0.1	3.5	0	0	0.5	0	0	0	1.5	0	0	1	0	0	0.5	0	0	0
Pedriza	High	35	P_H_35	0	0	0	2	0	0.1	0	0.5	0	1	0	0.8	0.2	2	0	0	0	0	0	0	1.5	0	0	3	0	0	0.2	0.5	0.5	0
Pedriza	Medium	1	P_M_01	0	0	0	0	0	0	0.1	0	0	12	0.1	0	0.2	4	0	0.5	0	0	4	0	0.5	0	0	0	0	0	0	0.5	0	0
Pedriza	Medium	2	P_M_02	0	0	0	0	0	0	0	0	0	15	0	0	0	4.5	0	2	0	0	10	0	2.5	0	0	0	0	0	0	0	0	0
Pedriza	Medium	3	P_M_03	0	0	0	0	0	0	0	0	0	10	0	0	0	3	0	0	1.5	0	3	0	2	0	0	1	0	0	0	0	0	1
Pedriza	Medium	4	P_M_04	0	0	0	0	0	0	0	0	0	4	0	0	0	3	0	1.5	0	0	2	0	2	0	0	1.5	0	0	0.8	0	0	0.8
Pedriza	Medium	5	P_M_05	0	0	0	0	0	0	0	0	8	2.5	0.5	0	2	3	0	1	0	0	0	0	2	0	0	1.5	0	0	0	0	0	1
Pedriza	Medium	6	P_M_06	1	0	0	0	0	0	0	0	0	14	0	0	0.3	3	0	0	0	0	1	0	3	0	0	0.2	0	0	0	0	0	1
Pedriza	Medium	7	P_M_07	1	0	0	1	0	0	0	0	2	8	0.5	0	3	3.5	0.5	0	0	0	0.3	0	5	0	0.1	3	0	0	1	0	0	2
Pedriza	Medium	8	P_M_08	0	0	0	10	0	0	0.1	0	8	4	0.5	0	0	1.5	0	0	0.1	0	0	0	2	0	0	3	0	0	12	0.5	0	2
Pedriza	Medium	9	P_M_09	0	0	0	4.5	0	0	1.5	0	0	2	0	0	0	3	1	0	0	0	0	0	8	0	0	0.2	0	0	8	0	0	0
Pedriza	Medium	10	P_M_10	0	0	0	5	0	0	1	0	0	8	0.1	0	0	4	0.5	0	0	0	0	0	1.5	0	0	0	0	0	1	0	0.5	0.2
Pedriza	Medium	11	P_M_11	0	0	0	0	0	0	0	0	0	4	0	0	0	8	0	0	0	0	0	0	2	0	0	0	0	0	2.5	0	0	0
Pedriza	Medium	12	P_M_12	0	0	0	0	0	0	0	0	0	1.5	0	0	0	8	0	0	0	0	0	0	10	0	0	0	0	1	0	0.1	0	0
Pedriza	Medium	13	P_M_13	0	0	0	0	0	0	0	0	0.1	9	0.2	0	0	8	0	0.5	0	0	6	0	3.5	0	0	1	0	0	0.5	0	0	0
Pedriza	Medium	14	P_M_14	0	0	0	0	0	0	0	0	0.2	18	0	0	0	6.5	0	0	0	0	5	0	2	0	0	0.5	0	0	1	0	0	0
Pedriza	Medium	15	P_M_15	0	0	0	0	0	0	0	0	0	20	0.2	0	0.2	4	0	0	0	0	15	0	3.5	0	0	0.5	0	0	0	0	0	0
Pedriza	Medium	16	P_M_16	0	0	0	0	0	1	0	0	0	30	0	0	0	2	0	0.5	0	0	30	0	4	0	0	0	0.2	2	4	1	0	0
Pedriza	Medium	17	P_M_17	0	0	0	0	0	0.1	0	0	0	35	0	0	0	3	0	1.5	0	0	15	0	2	0	0	0	0	2	2	0	0	0.2
Pedriza	Medium	18	P_M_18	0	0	0	0	0	0	0	0	0	18	0.2	0	1	1.5	0	0	0	0	20	0	1	0	0	0	0	1	0	0	0	0
Pedriza	Medium	19	P_M_19	0	0	0	0	0	0	0	0	0	5	0	0	1	8	0.5	0	0	0	10	0	2	0	0	0	0	0	0	0	0	2
Pedriza	Medium	20	P_M_20	0	0	0	0	0	0	0	0	0	5.5	0	0	1	2.5	0.5	0	0	0	2	0	2	0	0	1.5	0	0	2.5	0	0	3
Pedriza	Medium	21	P_M_21	0	0	0	0	0	0	0	0	0	10	0.5	0	1	0	0	1	0.5	0	12	0	1.5	0	0	0	0	0	2.5	0	0	1
Pedriza	Medium	22	P_M_22	0	0	0	0	0	0.1	0	0	0	8	0	0	3	6	1	0	0	0	2	0	1.5	0	0	0.5	0	1	6	0	0	1
Pedriza	Medium	23	P_M_23	0	0	0	0	0	0	0	0	0	12	0.1	0	0	3	0	0.5	0	0	28	0	2	0	0	0.5	0	0	0.5	0	0	1
Pedriza	Medium	24	P_M_24	0	0	0	0	0	1	0	0	0	22	0.5	0	0	1.5	0	0	0.5	0	6	0	2	0	0	1	0	0	5	0	0	0
Pedriza	Medium	25	P_M_25	0	0	0	0	0	0.2	0	0	0	15	1	0	0.1	3.5	0.5	2	0	0	14	0	1	0	0	0	0	0	1.5	1	0	0
Pedriza	Medium	26	P_M_26	0	0	0	0	0	0.1	0	0	0.1	12	0	0	0.3	4	0	1.5	0	0	6	0	3	0	0	0.2	0	0	1	0	0	0
Pedriza	Medium	27	P_M_27	0	0	0	0.1	0	0.5	0	0	3	20	0	0	0	1	0	3	0.3	0	30	0	0	0	0	0	0	0	2	0	0	0
Pedriza	Medium	28	P_M_28	0	0	0	0	0	0	0	0	0.3	12	0	0	0.5	3	0	3	0.3	0	8	0	1	0	0	0	0	0	4	0	0	0
Pedriza	Medium	29	P_M_29	0	0	0	0	0	0	0	0	0	12	2	0	0	2.5	0	0	0	0	0	10	4	0	0	3	0	0	5	0	0	0
Pedriza	Medium	30	P_M_30	0	0	0	0	0	0	0	0	0	8	0	0	0	6	0	0	0	0	0	0	5	0	0	0	0	0	3	0	0	1
Pedriza	Medium	31	P_M_31	1.5	0	0	9	0	0	1	0	0	3	0	0	0	0	0	0	0	0	0	0	7	0	0	1	0	0	20	0	0	0
Pedriza	Medium	32	P_M_32	0	0	0	0	0	0	0	0	0	2	0	0	0	0	0.1	0	0	0	0	0	12	0	0	1.5	0	0	12	0	0	1
Pedriza	Medium	33	P_M_33	0	0	0	6	0	0	0	0	3	4	0	0	0	2.5	2	0	0	0	0	0	9	0	0	3	0	0	3	0	0	0.3
Pedriza	Medium	34	P_M_34	0	0	0	2.5	0	0	0	0	3	5	0	0	0	5	0.1	0	0	0	0	0	9	0	0	1	0	0	5	0	0	0
Pedriza	Medium	35	P_M_35	0	0	0	2	0	0	0	0	0	20	0	0	0	6.5	0	0	0	0	0	0	6	0	0	0.2	0	3	0	0.2	0	0
Pedriza	Low	1	P_W_01	0	0	0	0	0	0.1	0	0	0	6	1.8	0	4	4	3	1	0	1	8	0	0.5	0	0	0	0	0.5	0	0.8	2	0
Pedriza	Low	2	P_W_02	0	0	0	0	0	0	0	0	0	5	1	0	2	6	0	4	0	0.5	0	0	3	0	0	0	0	4	0	1	5	0
Pedriza	Low	3	P_W_03	0	0	0	0	0	0	0	0	0.05	3	3	0	3	6	0.8	0.8	0	0	0	0	6	0	0	0	0	7	0	0.8	1	0
Pedriza	Low	4	P_W_04	0	0.8	0	0	0	0	0	0	0	6	2	0	1	2	1	0	0	0	0	0	3	0	0	1.5	0	10	0	0.8	4	0
Pedriza	Low	5	P_W_05	0	1.5	0	0	0	0	0	0	1	4	4	0	1.5	0.3	1	0	0	2	0	0	12	0	0	0.2	0	18	0	0.2	3	0
Pedriza	Low	6	P_W_06	0	1	0.8	0	0	0	1	0	1	2	2	0	2	0.3	9	0	0	1	0	0	4	0	0	0	0	8	0	1	1	0
Pedriza	Low	7	P_W_07	0	2	0.2	10	0	0	0	0	6	2	4	0.5	1	0.2	7	0.2	0	0.8	0	0	3	0	0	0.8	0	10	2	0	3	0
Pedriza	Low	8	P_W_08	0	2	0	0	0	0	0	0	9	3	5	0	3.5	0	1	0.2	0	0	0	8	4	0	0	0	0	10	0	2	2	0
Pedriza	Low	9	P_W_09	0	0	0	0	0	0.5	0	0	12	5	2	0	1.5	1	0	0.5	0	0	0	0	2	0	0	0	0	0.6	0.4	0.8	0.2	0
Pedriza	Low	10	P_W_10	0	1	0	0	0	0	0	0	4.5	7	5	0	2	1	1.5	0	0	0	0	0	4	0	0	0	0	1	0.2	2	0	1
Pedriza	Low	11	P_W_11	0	0.5	0	0	0	0	0	0	12	3	2	0	2	1.5	2.5	0	0	1	0	0	1	0	0	0.5	0	0	8	1	0	0
Pedriza	Low	12	P_W_12	0	2	0.6	0	0	0	0	0	1	3	4	0	2	2.5	5	0	0	2	0	0	3	0	0	0.4	0	0	6	0	0	0
Pedriza	Low	13	P_W_13	0	1	0	0	0	0	0	0	6	4	3	0	2	2	1	0	0	0	0	0	2.5	0	0	0	0	0	3	0	1	0
Pedriza	Low	14	P_W_14	0	1	0.8	0	0	0.5	0	0	22	3	5	0	0.8	1.5	0.5	0	0	0	10	0	4	0	0	0	0	0	4	1.5	2	0
Pedriza	Low	15	P_W_15	0	1	0	0	0	0	1	0	2.5	4	3	0	2	0.5	3	0	0	1	0	0	3	0	0	0	0	0	4	1	2	1.5
Pedriza	Low	16	P_W_16	0	0.8	1	0	0	0	0	0	8	5	4	0	2	0.5	4	0	0	0.8	0	0	4	0	0	1	0	0	15	0.6	0	1
Pedriza	Low	17	P_W_17	0	0.8	0	0	0	0	0	0	8	3	2.5	0	4	4	0.8	0	0	0	0	0.05	3.5	0	0	0	0	3	1	1	2	3
Pedriza	Low	18	P_W_18	0	0.3	0	0	0	0	0	0	0	5	1.5	0	1	1.5	1.5	0	0	0	0	0	3	0	0	0	0	15	1	0	0	2.5
Pedriza	Low	19	P_W_19	0	2	0	0	0	0	0	0	0	2.5	1.5	0	1.5	1	3.5	0	0	1.5	0	0	3	0	0	0.2	0	2.5	10	1.5	1.5	1
Pedriza	Low	20	P_W_20	0	0.5	0	0	0	0	0	0	0	3.5	2	0	0.5	2.5	4	0	0	0	0	0	3	0	0	0	0	10	1	1.5	6	1
Pedriza	Low	21	P_W_21	0	0	0	0	0	0	0	0	2.5	1.5	2	0	0.8	1	2	0	0	0	0	0	3	0	0	0.5	0	1.5	5	2	5	5
Pedriza	Low	22	P_W_22	0	0.6	0	0	0	0	0	0	15	3	3	0	2	2	0	1	0	1	0	0	2	0	0	0.5	0	0	3	0.5	0	0
Pedriza	Low	23	P_W_23	0	0	0	0	0	0.5	0	0	8	2	3	0	1.5	0.8	1	0	0	0	0	0	3	0	0	3.5	0	0	1	0	1	2
Pedriza	Low	24	P_W_24	0	0.8	0	0	0	0	0	0	9	3	1	0	0	0	0.5	0	0	0	0	0	2.5	0	0	0.5	0	1	8	0.2	0.3	2.5
Pedriza	Low	25	P_W_25	0	0	0	0	0	0	0	0	10	3.5	2	0	4	0.8	0	0	0	0	0	0	4	0	0	0	0	1	3	1	0	1.5
Pedriza	Low	26	P_W_26	0	0	0	0	0	0	0	0	5	3	2.5	0	1.5	3.5	0.2	0.8	0	4.5	0	0	3	0	0	1	0	1	3	0.5	0	1
Pedriza	Low	27	P_W_27	0	0	0	0	0	0	0	0	0	4	2	0	2.5	3	0.5	0	0	0	0	0	3	0	0	0	0	5	0	0.2	3	1
Pedriza	Low	28	P_W_28	0	0.5	0	5	0	0	0	0	6	5	1	0	0	3.5	1.5	0	0	0	0	0	3.5	0	0	0	0	12	0	0.8	2	0
Pedriza	Low	29	P_W_29	0	0	0	0	0	0	0	0	0	18	0.5	0	1	3	0	2.5	0.5	0	0	0	3	0	0	0.8	0	4	0	0.2	0	0.2
Pedriza	Low	30	P_W_30	0	0	0	0	0	0.2	0	0	0	20	7	0	0	8	0	3	0	0	0	0	4	0	0	0.3	0	45	0	0.5	0	0.5
Pedriza	Low	31	P_W_31	0	0	0	0	0	0	0	0	0	12	0.5	0	0	2	0	3	0	0	0	0	3.5	0	0	0	0	7	0	0	0	0
Pedriza	Low	32	P_W_32	0	0	0	0	0	1	0	0	0	40	0.5	0	0.5	4	0	15	0	0	0	0	7	0	0	0	0	25	0	0	0	0
Pedriza	Low	33	P_W_33	5	0	0	0	0	0	0	0	0	35	0.2	0	0	10	0	0.5	0	0	0	0	1	0	0.05	0	0	0	10	0	0	0
Pedriza	Low	34	P_W_34	0	0	0	0	0	0	0	0	0	40	0	0	0.5	2	0	6	0	0	0	0	0.5	0	0	0	0	10	6	0	0	0
Pedriza	Low	35	P_W_35	0.5	0	0	0	0	0	0	0	0	40	0	0	0	0	0	8	0	0	0	0	4	0	1	0	0	9	3	0.5	0	0
Valdemolino	High	1	V_H_01	0	0	0	0	0	0.3	0	0	12	1.5	0	0	0	0.5	0	0.6	0	0	0	0	2	0	0	1.5	0	0	1.5	0	1	0
Valdemolino	High	2	V_H_02	0	0	0	0	0	0	0	0	8	1.5	0	0.2	0	1	0.2	0	0	0	0	0	4	0	0	0	0	0	2	0	1.2	0
Valdemolino	High	3	V_H_03	0	0	0	0	0	0	0	0	8	1.5	1.5	0.3	0	1	0	0	0.5	0	0	0	1.5	0	0	0.5	0	0	0	0	2.5	0
Valdemolino	High	4	V_H_04	0	0	0	0	0	0	0	0	6	2	0.5	0	0.2	0.3	0	0	0.3	0.5	0	4	0	0	0	1.5	0	0	4	0	3.5	0
Valdemolino	High	5	V_H_05	0	0	0	1	0	0	0	0	0	1	1	0	0.7	3	0	0.3	0	0	0	0	2.5	0	0	0	0	0	4.5	0	1.5	0
Valdemolino	High	6	V_H_06	0	0	0	0	0	0	0	0	0	2.5	0.8	0	1.5	3	0	0	0	0	0	0	2.5	0	0	0	0	0	5	0	1.5	0
Valdemolino	High	7	V_H_07	0	0	0	4	0	0	0	0	5	2	1.5	0	1.5	2	0	0	0.3	0.7	3	0	0	0	0	0.8	0	0	0	1	1.5	0
Valdemolino	High	8	V_H_08	0	0	0	0	0	0	0	0	0	1	0.5	0	1.3	2	3	0	0	0.8	0	0	0.8	0	0	0	0	0	3	0	3	0
Valdemolino	High	9	V_H_09	0	0	0	0.6	0	0	0	0	1.5	0	1.3	0	3	3	0.8	0	0.3	0.5	0	0	0	0	0	0.7	0	0	3.5	0	1.5	0
Valdemolino	High	10	V_H_10	0	0	0	0	0	0	2.5	0	0	1	0.5	0	0.8	0	1	0	0	0.8	0	4	1	0	0	0	0	0	3	0	1.5	0
Valdemolino	High	11	V_H_11	0	0	0	0	0	0	0	0	5	3	1.5	0	0	0	0	0	0	0	0	0	3	0	0	0.5	0	0	2	0	2	0
Valdemolino	High	12	V_H_12	0	0	0	0.8	0	0	0	0	0	2	0.5	0	0.3	0.8	0	0.3	0	0	0	0	3	0	0	1.5	0.2	0	2	0.2	1.5	0
Valdemolino	High	13	V_H_13	0	0	0	0.8	0	0.2	0	4	1	0.8	0.8	0.3	0	0.8	0	0	0.2	0	0	0	2.5	0	0	0.8	0	0	1	0	2	0
Valdemolino	High	14	V_H_14	0	0	0	0.8	0	0	0	0	12	0	0	0	0	1.5	0	0	0.2	0	0	0	3	0	0	1	0	0	0	0	0	0
Valdemolino	High	15	V_H_15	0	0	0	0	0	0	0	0	8	3	0	0.2	0	0.8	0.8	0	0	0	0	0	2	0	0	0	0	0	2	2.5	2.5	0
Valdemolino	High	16	V_H_16	0	0	0	0	0	0.2	0	0	2	1	0	0	0.1	1	0.4	0.8	0.3	0	0	0	2.5	0	0	1.2	0	0	2	0	2	0
Valdemolino	High	17	V_H_17	0	0	0	0	0	0	0	0	6	3	0.5	0	0	1.5	0	0	0	0	0	0	2.5	0	0	0	0	0	1.5	0	3	0
Valdemolino	High	18	V_H_18	0	0	0	0	0	0	0	0	0	2.5	0	0	0	0.3	0	0	0	0	0	0	2	0	0	0.5	0	0	2	0.5	0.5	0
Valdemolino	High	19	V_H_19	0	0	0	0	0	0	0	0	5	5	0.3	0.2	0	1	0	0.4	0	0	0	0	3	0	0	1	0	0	2	0	0.3	0
Valdemolino	High	20	V_H_20	0	0	0	0.4	0	0	0	2	4	2	0	0	0	0.7	0	0.5	0	0	0	0	1	0	0	0.5	0	0	1.5	0	1	0
Valdemolino	High	21	V_H_21	0	0	0	0	0	0.2	0	0	0.8	2.5	3.5	0	0	0	2	0	0.3	0	2	0	1	0	0	2	0	0	14	0	2	0
Valdemolino	High	22	V_H_22	0	0	0	3	0	0	0	0	0.2	1.5	0.8	0	0.5	3	0	0	0.3	0	0	0	2	0	0	2	0	0	3.5	0	1.5	0
Valdemolino	High	23	V_H_23	0	0	0	1.5	0	0	0	0	8	3	0.8	0.8	0	0.5	0	0	0	0	0	0	3	0	0	1.5	0	0	2	0	2	0
Valdemolino	High	24	V_H_24	0	0	0	0	0	0	0	15	12	3	0.5	3	1	1	1	0	0	0	0	0	5	0	0.8	5	0.3	0	4	0	3	0
Valdemolino	High	25	V_H_25	0	0	0	0	0	0	0	0	10	1	0	0	0.5	0	0	0	0	0	0	0	3	0	0	0.2	0.8	0	1.5	0	2	0
Valdemolino	High	26	V_H_26	0	0	0	2	0	0	0	0	0	4	1	0	0	1.5	0	0.3	0	0	0	0	2	0	0	3	0	0	5	1	2	0
Valdemolino	High	27	V_H_27	0	0	0	3	0	0	0	0	3	4	3	0.5	0	1	0	0.3	0	0.3	0	0	3	0	0	1	0	1	4	0.5	1.5	0
Valdemolino	High	28	V_H_28	0	0	0	0.5	0	0.5	0	0	10	4	0.8	0	0.8	0.8	0	0	0	0	0	0	1.5	0	0	2	0	0	1.5	0	0	0
Valdemolino	High	29	V_H_29	0	0	0	10	0	0	0	0	20	2.5	0.3	0	1.5	0	0	0.2	0.8	0.1	0	10	0	0	0	2	0.8	0	1	0	0.8	0
Valdemolino	High	30	V_H_30	0	0	0	0	0	0.2	0	0	1.5	0.8	1	0	2	0.3	0.3	0	0	2.5	0	0	0	0	0	1	0	0	3	0	3	0
Valdemolino	High	31	V_H_31	0	0	0	2.5	0	0	0	0.5	3	1.5	1	1	1.5	0.5	1	0.2	0	0	0	0	1.5	0	0	1	0	0	3.5	0	1.8	0
Valdemolino	High	32	V_H_32	0	0	0	1	0	0	0.8	0	0	2	1	0	0	1.5	0	0	0	0.5	0	0	2.5	0	0	1.5	0	0	4	2	2	0
Valdemolino	High	33	V_H_33	0	0	0	0	0	0	0	2	15	0	0	0	0.7	0	0	0	0	0	0	0	2	0	0	2	0	2	0.8	0	0.7	0
Valdemolino	High	34	V_H_34	0	0	0	1	0	0	0	0	10	2.5	0.5	0	0	1	0	0	0	0	0	0	2	0	0	1	0	0.7	2	0	0.8	0
Valdemolino	High	35	V_H_35	0	0	0.6	0.5	0	0	0	0	4	3	0.3	1	0	0.8	0	0	0	0	0	0	3.5	0	0	0.8	0	0	2.5	1.5	1	0
Valdemolino	Medium	1	V_M_01	0	0	0	10	0	0	0.5	0	0	1.5	2.5	0.7	0.5	0	1.5	0	0	0	0	0	10	0	0	0	0	0	4	1.5	2.5	0
Valdemolino	Medium	2	V_M_02	0	0	0	4	1	0	1	1	4	3.5	1.5	0	0	0	1.5	0	0	0	0	0	10	0	0	0	0	4	2	0	2.5	0
Valdemolino	Medium	3	V_M_03	0	0	0	4	0	0	0	3	23	2.5	2.5	0	2.5	0.5	2	0	0	0	0	0	4	0	0.1	0	0.4	0	4	0	3	0
Valdemolino	Medium	4	V_M_04	0	0	0	2.5	0	0	0	4.5	0	2.5	2.5	0	0.8	1	2	0	0.3	2	0	0	0	0	0	0	0	5	2	1	3	0
Valdemolino	Medium	5	V_M_05	0	0	0	0	0	0	0	2.5	0	0.3	2	0	0.8	1.5	0	0	0.4	3	0	0	0	0	0	0	0	0	1	1	0.8	0
Valdemolino	Medium	6	V_M_06	0	0	0	0	0	0	0	0	0.1	0.8	1.5	0	1	1	2	0	0	0	0	0	0	0	0	0	0	0	2.5	1	2.5	0
Valdemolino	Medium	7	V_M_07	0	0	0	10	0	0	0	0	20	2.5	1	0	0.3	0	0	0	0	0	0	0	0.8	0	0	0.8	3	0	2	0	2.5	0
Valdemolino	Medium	8	V_M_08	0	0	0	6	0	0	0	0	0.1	1.5	2	0	2	2	1	0	0.7	4	0	0	0	0	0	0	0.3	0	0.5	0.5	0.8	0
Valdemolino	Medium	9	V_M_09	0	0	0	1.5	0	0	0	0	2	3	3	0	1	1	1.5	0	0	1.5	0	1	0	0	0	1	0.3	0	0.5	0	1.5	0
Valdemolino	Medium	10	V_M_10	0	0	0	2.5	0	0	0	0	0.5	1.5	2	0	1.5	0.8	1	0	0	2	0	0	0	0	0.1	2.5	0.1	0	0	0.6	1.5	0
Valdemolino	Medium	11	V_M_11	0	0	0	0	0	0	0	0	0.1	0.8	2	0	2	1.5	0.8	0	0	0	0	4	0	0	0.1	1	0	0	1	0.8	1.5	0
Valdemolino	Medium	12	V_M_12	0	0	0	0.5	0	0	0	0	8	2	1.5	0.8	1	1.5	2.5	0	0	0.5	0	0	0	0	0	1	0	0	0	0	2.5	0
Valdemolino	Medium	13	V_M_13	0	0	0	0	0	0	0	0	0.1	3.5	1.5	0	1.5	1	1	0	0	0	0	0	0	0	0	1.5	0	0	2	1	2.5	0
Valdemolino	Medium	14	V_M_14	0	0	0	2.5	0	0	0	0	0.5	1	2	0	1.5	0	1	0	0.3	0	0	0	0	0	0.8	0	0	0	1.5	1.5	2	0
Valdemolino	Medium	15	V_M_15	0	0	0	0	0	0	0	0	0	1.5	1.5	0	0.8	0.8	1	0	0.3	0	0	0	0	0	0	0	0.1	0	5	0	0.8	0
Valdemolino	Medium	16	V_M_16	0	0	0	2.5	0	0.2	0	0	0.2	2.5	1.5	0	1	1	1.5	0	0.4	1	5	4	0	0	0	0.3	0	0	2	2	0.5	0
Valdemolino	Medium	17	V_M_17	0	0	0	0	0	0.3	0	0	0	6	2.5	0	2	1	0	0	0	0	0	0	0	0	0.2	0.2	0.1	0	12	0.8	0	0
Valdemolino	Medium	18	V_M_18	0	0	0	2	0	0	0	0	1	4	3	0	1	0.8	1	0	0	0.8	0	0	0	0	0	0	0	0	6	1	1	0
Valdemolino	Medium	19	V_M_19	0	0	0	0	0	0.3	0	0	25.7	3	2.5	0	1	0.3	0	1	0.3	1	0	0	0	0	0	1	0	0	4	0	1.5	0
Valdemolino	Medium	20	V_M_20	0	0	0	0	0	0	0	0	3	3	1.5	0	2.5	0	0	1.2	0	4	0	0	4	0	0	0	0	0	6	0	0.5	0
Valdemolino	Medium	21	V_M_21	0	0	0	0	0	0	0	0	1.5	0.8	2	0	3	0.8	2	0	0	0	0	1.5	0	0	0	1	0	0	6	0	1.5	0
Valdemolino	Medium	22	V_M_22	0	0	0	3	0	0	0	0	10	3	2	0	2	1.5	0	0.5	0	0	0	0	1	0	0	2.5	0	0	4	0	3	0
Valdemolino	Medium	23	V_M_23	0	0	0	0	0	0	0	0	13	2.5	3	0	1	1	0	0	0	0	0	0	4	0	0.8	0	0	0	4	0	3	0
Valdemolino	Medium	24	V_M_24	0	0	0	5	0	0	1	0	0	2	2	0	0	0	0	0	0.3	0	0	0	4	0	0	2	0	0	3	0	1.5	0
Valdemolino	Medium	25	V_M_25	0	0	1.5	1.5	0	0.2	1.5	0	0	3.5	1.5	0	0	0.8	0	0	0	0	0	0	5	0	0	1.1	0	0	4	0	0	0
Valdemolino	Medium	26	V_M_26	1.5	0	1	0	0	0	3	0	1.5	4	1.5	0	0	0.8	0	0	0	0.7	0	0	5	0	0	0	0	0	3.5	0	1	0
Valdemolino	Medium	27	V_M_27	1	0	0	0	0	0.3	0	0	15	3.5	1	0	0	0	0	0	0	0	0	0	3.5	0	0	0	0	0	3	0	0	0
Valdemolino	Medium	28	V_M_28	0	0	0	4.5	0	0	0	0	0.2	0.5	2.5	0.6	0.8	0.8	0	0.8	0	1.5	0	0	1	0	0	0	0	0	3	0	0.8	0
Valdemolino	Medium	29	V_M_29	0	0	0	3.5	0	0.3	0	0	0	2	2.5	0.3	1	0.8	0.5	0	0	0.5	0	0	1	0	0	0	0	0	2	0	1.5	0
Valdemolino	Medium	30	V_M_30	0	0	0	4.5	0	0	0	4	0	2	1.5	0.5	0	2	2.5	0	0.7	0.5	0	0	0.8	0	0	3	0.4	0	3	1.5	2.5	0
Valdemolino	Medium	31	V_M_31	0	0	0	4	0	0.2	0	1.5	10	1.5	2	0	0	0.5	0.2	0	0.6	1.2	0	0	0	0	0	1	0	0	1	1.5	1	0
Valdemolino	Medium	32	V_M_32	0	0	0	2	0	0	1.5	0	10	1	2	0	0.8	0.3	0	0	0.4	0.8	0	0	1	0	0	0.8	0	0	2.5	1.5	2.5	0
Valdemolino	Medium	33	V_M_33	0	0	0	0	0	0.2	2.5	0	0	2.5	2.5	0.8	0	0.5	0	0	0	0	0	0	8	0	0	0	0	0	4	0	5	0
Valdemolino	Medium	34	V_M_34	0	0	0	2.5	0	0	0	0	2.5	0.2	2	0	0	0.8	0.8	0	0.9	0	0	0	0	0	0	0	0	0	2	1	3.5	0
Valdemolino	Medium	35	V_M_35	0	0	0	0	0	0.2	0	0	0	4.5	3	0	0	0	0	0	0	0	0	0	1	0	0.5	0	0	0	1	0	0.5	0
Valdemolino	Low	1	V_W_01	0	0	0	0.8	0	0	0	0.8	4	5	0.8	0.8	0.5	0	0.3	0	0	0	0	0	0	0	0.8	3	0	3	10	0	2	0
Valdemolino	Low	2	V_W_02	0	0	0	0.5	0	0.8	0	0	0.5	0.8	0	0	0.8	0	0.8	0	0	0	0	6	6	0	0	2.5	0	2	5	0	3.5	0
Valdemolino	Low	3	V_W_03	0	0	0	0	0	0	0	0	0	7	1	0	1.5	2	0	0	0	0	0	0	3.5	0	0.5	0	0	6	2	1	2.5	0
Valdemolino	Low	4	V_W_04	0	0	0	1.5	0	0.8	0	2.5	18	4	0.8	0	0.3	0	0	0	0	0	0	3	0	0	0.5	2.5	0	3	2	0	5	0
Valdemolino	Low	5	V_W_05	0	0	0	1	0	0	0	0	0.8	4	0.8	0	1.5	0	0.8	0	0	0	0	0	0	0	0.5	2	0	6	1.5	0	3.5	0
Valdemolino	Low	6	V_W_06	0	0	0	0.8	0.4	0.8	0	2.5	3	2.5	2	1.5	0	0.5	1	0	0	0	0	0	0	0	0.5	1	0	2	0	0	10	0
Valdemolino	Low	7	V_W_07	0	0	0	4	0	0	0	0	0	9	2	0	2	2	0.8	0	0	0	0	0	0	0	0.5	1	0	3	0	1.5	2	0
Valdemolino	Low	8	V_W_08	0	0	0	2	0	0	0	0	0	2.5	2.5	0	3	3	0.5	0	0	0	0	0	0	0	0	1	0	0	0	2	2	0
Valdemolino	Low	9	V_W_09	0	0	0	2	0	0.8	0	0	30	2.5	2	0	1.5	0.5	0	0	0.3	0	0	0	0	0	0	1.5	8	1.5	0	0	0.5	0
Valdemolino	Low	10	V_W_10	0	0	0	0	0	0	0	0	0	2.5	1.5	0	2	2	0.5	0	0	1	0	6	0	0	0	2.5	0.2	0.5	2.5	1.5	2.5	0
Valdemolino	Low	11	V_W_11	0	0	0	1	0	0	0	2.5	0.1	2.5	2	0	1.5	1.5	2	0	0	2.5	0	0.2	0	0	0	0	0	0.5	0	1	1.5	0
Valdemolino	Low	12	V_W_12	0	0	0	1	0	0	0	0	0.1	2.5	2	0	2	1	1	0	0.3	2	0	5	0	0	0	1	0	1	0.6	0.5	2.5	0
Valdemolino	Low	13	V_W_13	0	0	0	0.5	0	0.8	0	3.5	6	3	2.5	0.8	3	0.8	0.5	0	0	1	0	0	0	0	0.4	1.5	0	0	2.5	0	1.5	0
Valdemolino	Low	14	V_W_14	0	0	0	0	0.5	0.2	0	0	0	3	1.5	0	2.5	0	0	0	0	0	0	0	0	0	0	1	0	0	2	0.5	2	0
Valdemolino	Low	15	V_W_15	0	0	0	5	0	0	0	0	7	4	1	0	2	1	0.8	0	0	0	0	0	0	0	0.4	1.5	0.2	0	0	1.5	0	0
Valdemolino	Low	16	V_W_16	0	0	0	2	0	0	0	0	0	3.5	2.5	0	2.5	3	1.5	0	0	0	0	0	0	0	0	1	0	0	0.8	0	2.5	0
Valdemolino	Low	17	V_W_17	0	0	0	60	0	0	0	10	3	2.5	0.8	1	2	0	2.5	0	0	0	0	8	0	0	0.5	1	0	0	0	1	10	0
Valdemolino	Low	18	V_W_18	0	0	0	20	0	0	0	15	2	3	1.5	0.8	0	0.5	6	0	0	0	0	0	0	0	0	1	0	0	0	2.5	4	0
Valdemolino	Low	19	V_W_19	0	0	0	12	0	0.5	0	5	2.5	3	0	3	0	0	2.5	0	0	0	0	0	0	0	0	3	0	4	0.5	0	5	0
Valdemolino	Low	20	V_W_20	0	0	0	10	0	0.3	0	0	2	6	3	1	1.5	1	7	0	0	0	0	0	0	0	0	0	0	0.5	0	0	9	0
Valdemolino	Low	21	V_W_21	0	0	0	1.5	0	0	0	0	4	5	3	0	2	2	0	0	0	0	0	6	0	0	0.4	0.4	0	5	1	1.2	1.5	0
Valdemolino	Low	22	V_W_22	0	0	0	0.5	0	0	0	4	5	1	1.5	0	2.5	0	0	0	0	0	0	0	0	0	0.2	0.2	0	0	0	0	0	0
Valdemolino	Low	23	V_W_23	0	0	0	5	0	0	0	15	4	0	1.5	0	2	0	0	0	0.3	0	0	0	0	0	0.2	1.5	0.2	0	0	0	4	0
Valdemolino	Low	24	V_W_24	0	0	0	2.5	0	0	0	1.5	0.1	2	2	0	3	0.8	1	0	0	0	0	0	0	0	0.2	3	0	4	0	0.2	3	0
Valdemolino	Low	25	V_W_25	0	0	0	2	0	0	0	0.5	0	6	1.5	0	3	2	0.5	0	0	1.5	0	0	0	0	0	0	0	0.5	0	1	3	0
Valdemolino	Low	26	V_W_26	0	0	0	4.5	0	0	0	0	0.1	5.5	2.5	0	4	3.5	1.5	0	0	0	0	0.1	0	0	0	0	0	1	0	2.3	2.5	0
Valdemolino	Low	27	V_W_27	0	0	0	10	0	0.5	0	1.5	20	4	1	3	1	0	0.8	0	0	0	0	0	0	0	0.5	2.5	0	0	0	0	5	0
Valdemolino	Low	28	V_W_28	0	0	0	3.5	0	0.3	0	0	3	8	4	1	0	0	0	0	0	0	0	0	0	0	0	1	0	0	0	0.4	5	0
Valdemolino	Low	29	V_W_29	0	0	0	35	0	0	0	2	40	2.5	0.3	2	0	0	0	0	0	0	0	0	0	0	0.2	0	0	0	0	0	2.5	0
Valdemolino	Low	30	V_W_30	0	0	0	0	0	0	0	1	0.8	1	2	0	1.8	2	0.2	0	0	0	0	2	0	0	0.2	0	0	2	0	0.5	4	0
Valdemolino	Low	31	V_W_31	0	0	0	5	0	0	0	10	30	1	2	0	0.3	0	0.5	0	0	0	0	0	0	0	0.3	0.8	0	2	0	0.5	6	0
Valdemolino	Low	32	V_W_32	0	0	0	10	0	0	0	0	0	0.6	2	1	4	0.8	0.4	0	0	1	0	0	0	0	0.2	1.5	0	2	0	0.3	2.5	0
Valdemolino	Low	33	V_W_33	0	0	0	1	0	0	0	0	0	0.2	2	0	3	0.5	0.3	0	0	1.8	0	2	0	0	0	0.5	0.1	1	0	1.2	2	0
Valdemolino	Low	34	V_W_34	0	0	0	1	0	0.2	0	0	7	1	1	0.4	2.8	0	0.8	0	0.1	0.8	0	0.5	0	0	0	1	0	1.8	0.4	0.2	3	0
Valdemolino	Low	35	V_W_35	0	0	0	0.3	0	0	0	0	0	0.5	2	0.5	5	0	0.2	0	0	3.5	0	0	0	0	0.8	0.5	0	2	1.2	0	5	0

## Sheet: gypsophilic_value
spp	Gypsophilic_value
AllSph	2
ArtHer	2
AspAri	2
AspFis	2
AstAlo	2
AstInc	2
AstMon	2
AtrHum	2
aveBro	2
BraRet	2
BroEre	2
CarTen	2
CenAsp	2
ConArv	2
CorMon	2
CreVes	2
DacGlo	2
DipSer	2
EchRit	2
GenSco	2
GypStr	4.69
HedBov	2
HelMar	2
HelSqu	4.87
HelSyr	2
HelVio	2
HelSto	2
HerFru	4.05
KoeVal	2
LauFra	3.1
LauPum	3.22
LinSuf	2
LygSpa	2
MatFru	2
OnoTri	4.43
OnoCf	2
OroCer	2
PlaAlb	2
PoaBul	2
PolRup	2
ResStr	3.97
RosOff	2
SalVer	2
SedSed	2
SidFru	2
SonTen	2
StiBar	2
StiLag	2
StiPar	2
TeuCap	2
ThyVul	2
ThyZyg	2

## Sheet: leaf_traits
species	grazing	C	N	S
BraRet	High	42.44	1.6233	0.5622
BraRet	High	42.74	1.516	0.483
BraRet	High	42.9	1.6291	0.3952
BraRet	High	43.16	1.6956	0.5361
BraRet	High	43.18	1.6309	0.4335
BraRet	Low	43.43	1.5379	0.3558
BraRet	Low	44.25	1.2628	0.3954
BraRet	Low	44.28	1.2857	0.5137
BraRet	Low	44.39	1.3783	0.3729
BraRet	Low	45.04	1.5467	0.3147
BraRet	Medium	44.36	1.7541	0.4137
BraRet	Medium	44.61	1.541	0.4773
BraRet	Medium	45.13	1.5776	0.4707
BraRet	Medium	45.39	1.7785	0.4395
BraRet	Medium	45.55	1.5514	0.442
GenSco	High	46.32	3.0295	0.3362
GenSco	High	47.29	2.5712	0.2224
GenSco	High	47.61	2.6913	0.2189
GenSco	Low	46.29	3.0764	0.2535
GenSco	Low	46.67	2.7135	0.2431
GenSco	Low	46.83	3.299	0.2686
GenSco	Low	47.56	3.1334	0.3142
GenSco	Low	48.23	3.196	0.318
GenSco	Medium	46.19	3.8831	0.5738
GenSco	Medium	46.46	3.2997	0.2905
GenSco	Medium	46.56	3.0576	0.2348
GenSco	Medium	46.73		0.2531
GenSco	Medium	47.59	2.7976	0.2251
GypStr	High	32.7	2.2604	1.127
GypStr	High	34.2	2.4459	1.318
GypStr	High	34.72	2.4588	1.65
GypStr	Low	35.27	2.3793	1.376
GypStr	Low	37.09	2.9443	1.753
GypStr	Low	37.71	3.072	1.096
GypStr	Low	37.87	2.8285	0.8113
GypStr	Low	45.31	1.9872	0.3013
GypStr	Medium	34.01	2.758	2.407
GypStr	Medium	34.04	2.3753	1.386
GypStr	Medium	34.34	2.8125	1.603
GypStr	Medium	36.1	2.9232	1.252
GypStr	Medium	36.22	2.2867	0.8038
HelSqu	High	39.11	1.7942	2.639
HelSqu	High	39.68	2.0853	2.604
HelSqu	High	40.06	1.7582	3.159
HelSqu	Low	32.7	1.5021	1.127
HelSqu	Low	34.2	1.8541	1.318
HelSqu	Low	34.72	2.0359	1.65
HelSqu	Low	39.7	1.489	2.958
HelSqu	Low	40.51	1.9061	3.46
HelSqu	Medium	39.45	1.9508	2.456
HelSqu	Medium	40.11	1.4431	2.43
HelSqu	Medium	40.31	1.9193	2.411
HelSqu	Medium	40.59	1.8473	2.425
HelSqu	Medium	41.13	1.6675	2.302
HelSto	High	42.17	2.1124	0.6225
HelSto	High	43.94	2.0569	0.5939
HelSto	High	44.94	2.1658	0.6422
HelSto	Low	45.76	1.715	0.3933
HelSto	Low	45.95	1.6118	0.4687
HelSto	Low	46.38	1.6858	0.363
HelSto	Low	46.94	1.4049	0.2793
HelSto	Low	48.12	1.9343	0.2833
HelSto	Medium	44.83	1.8587	0.7124
HelSto	Medium	44.89	1.6173	0.2905
HelSto	Medium	45.1	1.9229	0.5406
HelSto	Medium	45.41	1.6595	0.3244
HelSyr	High	43.27	2.0948	0.9309
HelSyr	High	43.48	1.8416	1.031
HelSyr	High	44.14	1.965	0.8623
HelSyr	Low	42.76	1.6826	0.6748
HelSyr	Low	42.96	1.5269	0.8849
HelSyr	Low	43.17	1.5933	0.6598
HelSyr	Low	43.56	1.3732	0.9667
HelSyr	Low	43.62	1.4209	0.5005
HelSyr	Medium	42.26	2.1183	1.022
HelSyr	Medium	43.68	2.2543	1.01
HelSyr	Medium	43.87	1.7649	0.6905
HelSyr	Medium	44.33	1.7242	1.171
HelSyr	Medium	44.61	1.7597	0.6125
HelVio	High	43.54	2.157	0.3862
HelVio	High	45.46	2.1893	0.3174
HelVio	High	47.1	2.1164	0.3275
HelVio	Low	44.42		0.2822
HelVio	Low	45.15	2.0188	0.314
HelVio	Low	45.47	2.382	0.3031
HelVio	Low	45.48	2.4443	0.3256
HelVio	Low	46.01	2.3459	0.2974
HelVio	Medium	44.69	2.5141	0.2769
HelVio	Medium	44.7	2.0809	0.3026
HelVio	Medium	45.21	2.4235	0.3128
HelVio	Medium	45.36	2.2572	0.3036
HelVio	Medium	45.56	2.5546	0.3024
HerFru	High	41.21	2.52	1.072
HerFru	High	42.25	2.7359	0.6935
HerFru	High	42.31	2.6697	0.705
HerFru	High	42.94	2.851	0.6448
HerFru	High	43.36	2.7539	1.131
HerFru	Low	43.66	1.6385	0.7005
HerFru	Low	43.82	1.8713	0.6076
HerFru	Low	43.84	2.1599	0.595
HerFru	Low	44.28	1.7529	0.4909
HerFru	Low	44.52	1.9179	0.6951
HerFru	Medium	41.5	2.1901	0.8068
HerFru	Medium	41.57	1.8617	0.4803
HerFru	Medium	41.7	2.0627	0.6197
HerFru	Medium	41.95	2.3112	1.1
HerFru	Medium	42.8	2.1155	0.8063
KoeVal	High	41.44	1.8764	0.349
KoeVal	High	41.69	1.9155	0.484
KoeVal	High	42.99	1.9531	0.4236
KoeVal	High	43.48	1.8031	0.3505
KoeVal	High	43.55	2.01	0.3807
KoeVal	Low	42.4	1.5507	0.2657
KoeVal	Low	42.96	1.5	0.2303
KoeVal	Low	43.27	1.843	0.2956
KoeVal	Low	43.32	1.6719	0.2583
KoeVal	Low	43.52	1.7687	0.3344
KoeVal	Medium	42.72	1.7304	0.3436
KoeVal	Medium	43.15	2.1494	0.4135
KoeVal	Medium	43.25	1.5435	0.3069
KoeVal	Medium	44.02	1.9547	0.3243
KoeVal	Medium	44.1	1.9099	0.3715
LinSuf	High	41.78	3.3145	0.3954
LinSuf	High	41.87	3.2919	0.3501
LinSuf	High	43.25	3.0209	0.3729
LinSuf	Low	41.99	3.2015	0.3793
LinSuf	Low	42.66	3.5068	0.2835
LinSuf	Low	42.73	2.3621	0.286
LinSuf	Low	43.58	3.2118	0.3181
LinSuf	Low		2.8155
LinSuf	Medium	42.19	2.8219	0.292
LinSuf	Medium	43.24	2.7548	0.3278
LinSuf	Medium	43.28	2.5071	0.2881
LinSuf	Medium	43.4	2.4771	0.2935
LinSuf	Medium	43.54	2.3675	0.2728
OnoTri	High	30.66	2.4283	5.649
OnoTri	High	31.46	2.4559	4.941
OnoTri	High	33.14	2.6056	4.612
OnoTri	Low	33.94	2.225	2.848
OnoTri	Low	34.19	2.5206	3.719
OnoTri	Low	35.02	2.5814	2.64
OnoTri	Low	35.03	2.3787	3.408
OnoTri	Low	35.6	3.1112	3.776
OnoTri	Medium	30.42	2.6763	5.598
OnoTri	Medium	33.31	2.5566	5.827
OnoTri	Medium	34.47	2.399	4.552
OnoTri	Medium	34.97	2.5392	3.459
OnoTri	Medium	35.7	2.5577	4.09
SidFru	High	43.69	2.9038	0.2765
SidFru	High	43.77	3.2067	0.327
SidFru	High	44.28	3.0732	0.3375
SidFru	Low	42.23	2.5404	0.2596
SidFru	Low	42.47	2.5392	0.2462
SidFru	Low	42.79	2.8642	0.2199
SidFru	Low	43.2	2.5219	0.2485
SidFru	Low	43.86	2.6433	0.2285
SidFru	Medium	42.31	2.8451	0.3164
SidFru	Medium	42.73	2.9551	0.3151
SidFru	Medium	44.57		0.3193
SidFru	Medium	44.69	2.6312	0.291
SidFru	Medium	45.02	3.335	0.276
TeuCap	High	48.83	2.7267	0.4192
TeuCap	High	49.39	2.6033	0.5419
TeuCap	High	49.41	2.9467	0.5094
TeuCap	Low	50.06	2.2899	0.2976
TeuCap	Low	50.32	2.2382	0.3546
TeuCap	Low	50.48	2.4853	0.3765
TeuCap	Low	51.11	2.2767	0.4272
TeuCap	Low	51.34	2.0697	0.3829
TeuCap	Medium	50.17	2.7113	0.3374
TeuCap	Medium	50.27	3.2234	0.474
TeuCap	Medium	51.18	2.4151	0.3573
TeuCap	Medium	51.3	2.1898	0.3275
TeuCap	Medium	51.85	3.0432	0.3979
ThyVul	High	46.93	2.2248	0.4481
ThyVul	High	48.58	2.2893	0.2818
ThyVul	High	49.06	1.9312	0.3001
ThyVul	Low	49.48	1.6307	0.303
ThyVul	Low	50.32	1.8811	0.2819
ThyVul	Low	50.38	1.9077	0.3321
ThyVul	Low	51.01	1.9591	0.3285
ThyVul	Low	51.23	1.8564	0.3937
ThyVul	Medium	48.85	1.6955	0.3431
ThyVul	Medium	49.1	1.9637	0.3461
ThyVul	Medium	49.6	1.9374	0.4617
ThyVul	Medium	49.69	1.7951	0.3196
ThyVul	Medium	50.25	1.8891	0.2985

## Sheet: soil_data
ID	Locality	Grazing	pH	Conductivity	N	C	Clay	Lime	Sand	Gypsum
H_H_1	Hoyo	High	7.86	2264	0.11168	2.27	5.34863	36.1614	58.49	90.9279
H_H_2	Hoyo	High	7.9	2209	0.08552	2.91	8.77742	36.7826	54.44	81.2028
H_H_3	Hoyo	High	8.05	2222	0.05989	2.53	8.96276	31.5272	59.51	78.0511
H_M_1	Hoyo	Medium	7.95	2339	0.15882	2.25	5.16329	23.9067	70.93	35.6229
H_M_2	Hoyo	Medium	7.99	2149	0.06681	0.96	9.36433	38.6957	51.94	99.4353
H_M_3	Hoyo	Medium	7.99	2208	0.1219	2.78	10.5999	30.4901	58.91	71.4394
H_W_1	Hoyo	Low	8.02	2324	0.08398	2.55	9.79679	33.6232	56.58	36.8427
H_W_2	Hoyo	Low	8.03	2233	0.0994	2.33	9.98213	31.5979	58.42	77.9431
H_W_3	Hoyo	Low	7.97	2301	0.10281	3.01	14.5539	40.8261	44.62	53.3797
P_H_1	Pedriza	High	8.08	2288	0.06224	2.09	10.4455	32.4345	57.12	47.6572
P_H_2	Pedriza	High	8.03	2252	0.09091	1.34	5.96643	27.6236	66.41	78.4839
P_H_3	Pedriza	High	7.95	2288	0.10458	1.95	7.85072	38.3793	53.77	66.6162
P_M_1	Pedriza	Medium	8.06	2305	0.10706	1.89	4.85439	29.2056	65.94	61.7041
P_M_2	Pedriza	Medium	8.01	2187	0.05764	0.833	15.9748	43.8452	40.18	100.964
P_M_3	Pedriza	Medium	7.97	2202	0.06407	1.08	12.7313	36.4587	50.81	100.648
P_W_1	Pedriza	Low	7.99	2250	0.08712	2.41	10.7853	37.7647	51.45	78.1419
P_W_2	Pedriza	Low	8	2238	0.08156	2.12	7.75805	33.052	59.19	80.6868
P_W_3	Pedriza	Low	8.1	2230	0.04434	1.59	10.4146	34.4954	55.09	82.9704
V_H_1	Valdemolino	High	8.02	2210	0.09947	1.54	7.54182	35.6682	56.79	83.2686
V_H_2	Valdemolino	High	8.13	2309	0.06434	1.19	6.368	28.852	64.78	75.4908
V_H_3	Valdemolino	High	8.04	2553	0.04738	0.621	7.44915	34.3008	58.25	92.3615
V_M_1	Valdemolino	Medium	8	2340	0.05884	1.92	9.20988	31.4201	59.37	92.8541
V_M_2	Valdemolino	Medium	7.99	2240	0.07218	4.22	17.2104	44.7996	37.99	48.8653
V_M_3	Valdemolino	Medium	8.02	2244	0.06235	2.37	9.1481	38.1019	52.75	78.9334
V_W_1	Valdemolino	Low	8.02	2238	0.13083	3.2	8.31407	33.5659	58.12	67.1549
V_W_2	Valdemolino	Low	7.92	2280	0.09115	1.82	7.63449	35.3955	56.97	78.9444
V_W_3	Valdemolino	Low	8	2187	0.07938	2.49	11.1251	37.9249	50.95	86.2955

## Sheet: environmental_data
locality	grazing	plot	ID	C	Clay	Conductivity	Gypsum	Lime	N	pH	Sand	PC1	PC2	PC3	cover	canopy_height
Hoyo	High	1	H_H_01	2.57	7.69627	2231.67	83.3939	34.8237	0.0856967	7.93667	57.48	0.00351164	-0.143873	0.305896	17.8	25
Hoyo	High	2	H_H_02	2.57	7.69627	2231.67	83.3939	34.8237	0.0856967	7.93667	57.48	0.00351164	-0.143873	0.305896	15.6	11
Hoyo	High	3	H_H_03	2.57	7.69627	2231.67	83.3939	34.8237	0.0856967	7.93667	57.48	0.00351164	-0.143873	0.305896	17.8	15
Hoyo	High	4	H_H_04	2.57	7.69627	2231.67	83.3939	34.8237	0.0856967	7.93667	57.48	0.00351164	-0.143873	0.305896	12.4	14
Hoyo	High	5	H_H_05	2.57	7.69627	2231.67	83.3939	34.8237	0.0856967	7.93667	57.48	0.00351164	-0.143873	0.305896	14	11
Hoyo	High	6	H_H_06	2.57	7.69627	2231.67	83.3939	34.8237	0.0856967	7.93667	57.48	0.00351164	-0.143873	0.305896	15.6	23
Hoyo	High	7	H_H_07	2.57	7.69627	2231.67	83.3939	34.8237	0.0856967	7.93667	57.48	0.00351164	-0.143873	0.305896	8.4	9
Hoyo	High	8	H_H_08	2.57	7.69627	2231.67	83.3939	34.8237	0.0856967	7.93667	57.48	0.00351164	-0.143873	0.305896	23.8	5
Hoyo	High	9	H_H_09	2.57	7.69627	2231.67	83.3939	34.8237	0.0856967	7.93667	57.48	0.00351164	-0.143873	0.305896	34.7	16
Hoyo	High	10	H_H_10	2.57	7.69627	2231.67	83.3939	34.8237	0.0856967	7.93667	57.48	0.00351164	-0.143873	0.305896	31.8	20
Hoyo	High	11	H_H_11	2.57	7.69627	2231.67	83.3939	34.8237	0.0856967	7.93667	57.48	0.00351164	-0.143873	0.305896	16.4	6
Hoyo	High	12	H_H_12	2.57	7.69627	2231.67	83.3939	34.8237	0.0856967	7.93667	57.48	0.00351164	-0.143873	0.305896	21.5	12
Hoyo	High	13	H_H_13	2.57	7.69627	2231.67	83.3939	34.8237	0.0856967	7.93667	57.48	0.00351164	-0.143873	0.305896	19.9	26
Hoyo	High	14	H_H_14	2.57	7.69627	2231.67	83.3939	34.8237	0.0856967	7.93667	57.48	0.00351164	-0.143873	0.305896	32.2	16
Hoyo	High	15	H_H_15	2.57	7.69627	2231.67	83.3939	34.8237	0.0856967	7.93667	57.48	0.00351164	-0.143873	0.305896	22.6	15
Hoyo	High	16	H_H_16	2.57	7.69627	2231.67	83.3939	34.8237	0.0856967	7.93667	57.48	0.00351164	-0.143873	0.305896	23.9	17
Hoyo	High	17	H_H_17	2.57	7.69627	2231.67	83.3939	34.8237	0.0856967	7.93667	57.48	0.00351164	-0.143873	0.305896	19.4	10
Hoyo	High	18	H_H_18	2.57	7.69627	2231.67	83.3939	34.8237	0.0856967	7.93667	57.48	0.00351164	-0.143873	0.305896	27	10
Hoyo	High	19	H_H_19	2.57	7.69627	2231.67	83.3939	34.8237	0.0856967	7.93667	57.48	0.00351164	-0.143873	0.305896	13.4	13
Hoyo	High	20	H_H_20	2.57	7.69627	2231.67	83.3939	34.8237	0.0856967	7.93667	57.48	0.00351164	-0.143873	0.305896	8.6	10
Hoyo	High	21	H_H_21	2.57	7.69627	2231.67	83.3939	34.8237	0.0856967	7.93667	57.48	0.00351164	-0.143873	0.305896	23.7	15
Hoyo	High	22	H_H_22	2.57	7.69627	2231.67	83.3939	34.8237	0.0856967	7.93667	57.48	0.00351164	-0.143873	0.305896	49.2	17
Hoyo	High	23	H_H_23	2.57	7.69627	2231.67	83.3939	34.8237	0.0856967	7.93667	57.48	0.00351164	-0.143873	0.305896	5.2	10
Hoyo	High	24	H_H_24	2.57	7.69627	2231.67	83.3939	34.8237	0.0856967	7.93667	57.48	0.00351164	-0.143873	0.305896	11	15
Hoyo	High	25	H_H_25	2.57	7.69627	2231.67	83.3939	34.8237	0.0856967	7.93667	57.48	0.00351164	-0.143873	0.305896	26	12
Hoyo	High	26	H_H_26	2.57	7.69627	2231.67	83.3939	34.8237	0.0856967	7.93667	57.48	0.00351164	-0.143873	0.305896	26.4	7
Hoyo	High	27	H_H_27	2.57	7.69627	2231.67	83.3939	34.8237	0.0856967	7.93667	57.48	0.00351164	-0.143873	0.305896	23.8	10
Hoyo	High	28	H_H_28	2.57	7.69627	2231.67	83.3939	34.8237	0.0856967	7.93667	57.48	0.00351164	-0.143873	0.305896	17	15
Hoyo	High	29	H_H_29	2.57	7.69627	2231.67	83.3939	34.8237	0.0856967	7.93667	57.48	0.00351164	-0.143873	0.305896	36.9	12
Hoyo	High	30	H_H_30	2.57	7.69627	2231.67	83.3939	34.8237	0.0856967	7.93667	57.48	0.00351164	-0.143873	0.305896	18.3	18
Hoyo	High	31	H_H_31	2.57	7.69627	2231.67	83.3939	34.8237	0.0856967	7.93667	57.48	0.00351164	-0.143873	0.305896	14.4	10
Hoyo	High	32	H_H_32	2.57	7.69627	2231.67	83.3939	34.8237	0.0856967	7.93667	57.48	0.00351164	-0.143873	0.305896	14.5	16
Hoyo	High	33	H_H_33	2.57	7.69627	2231.67	83.3939	34.8237	0.0856967	7.93667	57.48	0.00351164	-0.143873	0.305896	21.4	11
Hoyo	High	34	H_H_34	2.57	7.69627	2231.67	83.3939	34.8237	0.0856967	7.93667	57.48	0.00351164	-0.143873	0.305896	11.2	9
Hoyo	High	35	H_H_35	2.57	7.69627	2231.67	83.3939	34.8237	0.0856967	7.93667	57.48	0.00351164	-0.143873	0.305896	33.5	15
Hoyo	Medium	1	H_M_01	1.99667	8.37585	2232	68.8325	31.0308	0.115843	7.97667	60.5933	0.29562	-0.218148	0.177457	20.8	28
Hoyo	Medium	2	H_M_02	1.99667	8.37585	2232	68.8325	31.0308	0.115843	7.97667	60.5933	0.29562	-0.218148	0.177457	37.3	41
Hoyo	Medium	3	H_M_03	1.99667	8.37585	2232	68.8325	31.0308	0.115843	7.97667	60.5933	0.29562	-0.218148	0.177457	29.2	20
Hoyo	Medium	4	H_M_04	1.99667	8.37585	2232	68.8325	31.0308	0.115843	7.97667	60.5933	0.29562	-0.218148	0.177457	44.3	36
Hoyo	Medium	5	H_M_05	1.99667	8.37585	2232	68.8325	31.0308	0.115843	7.97667	60.5933	0.29562	-0.218148	0.177457	35.3	30
Hoyo	Medium	6	H_M_06	1.99667	8.37585	2232	68.8325	31.0308	0.115843	7.97667	60.5933	0.29562	-0.218148	0.177457	30.8	37
Hoyo	Medium	7	H_M_07	1.99667	8.37585	2232	68.8325	31.0308	0.115843	7.97667	60.5933	0.29562	-0.218148	0.177457	14.6	16
Hoyo	Medium	8	H_M_08	1.99667	8.37585	2232	68.8325	31.0308	0.115843	7.97667	60.5933	0.29562	-0.218148	0.177457	28.1	13
Hoyo	Medium	9	H_M_09	1.99667	8.37585	2232	68.8325	31.0308	0.115843	7.97667	60.5933	0.29562	-0.218148	0.177457	57.4	45
Hoyo	Medium	10	H_M_10	1.99667	8.37585	2232	68.8325	31.0308	0.115843	7.97667	60.5933	0.29562	-0.218148	0.177457	20.1	10
Hoyo	Medium	11	H_M_11	1.99667	8.37585	2232	68.8325	31.0308	0.115843	7.97667	60.5933	0.29562	-0.218148	0.177457	88.2	55
Hoyo	Medium	12	H_M_12	1.99667	8.37585	2232	68.8325	31.0308	0.115843	7.97667	60.5933	0.29562	-0.218148	0.177457	18.1	11
Hoyo	Medium	13	H_M_13	1.99667	8.37585	2232	68.8325	31.0308	0.115843	7.97667	60.5933	0.29562	-0.218148	0.177457	19.3	12
Hoyo	Medium	14	H_M_14	1.99667	8.37585	2232	68.8325	31.0308	0.115843	7.97667	60.5933	0.29562	-0.218148	0.177457	13.8	12
Hoyo	Medium	15	H_M_15	1.99667	8.37585	2232	68.8325	31.0308	0.115843	7.97667	60.5933	0.29562	-0.218148	0.177457	28.7	15
Hoyo	Medium	16	H_M_16	1.99667	8.37585	2232	68.8325	31.0308	0.115843	7.97667	60.5933	0.29562	-0.218148	0.177457	63	45
Hoyo	Medium	17	H_M_17	1.99667	8.37585	2232	68.8325	31.0308	0.115843	7.97667	60.5933	0.29562	-0.218148	0.177457	3	6
Hoyo	Medium	18	H_M_18	1.99667	8.37585	2232	68.8325	31.0308	0.115843	7.97667	60.5933	0.29562	-0.218148	0.177457	19.6	12
Hoyo	Medium	19	H_M_19	1.99667	8.37585	2232	68.8325	31.0308	0.115843	7.97667	60.5933	0.29562	-0.218148	0.177457	29.6	51
Hoyo	Medium	20	H_M_20	1.99667	8.37585	2232	68.8325	31.0308	0.115843	7.97667	60.5933	0.29562	-0.218148	0.177457	15.5	9
Hoyo	Medium	21	H_M_21	1.99667	8.37585	2232	68.8325	31.0308	0.115843	7.97667	60.5933	0.29562	-0.218148	0.177457	41.9	7
Hoyo	Medium	22	H_M_22	1.99667	8.37585	2232	68.8325	31.0308	0.115843	7.97667	60.5933	0.29562	-0.218148	0.177457	20.8	15
Hoyo	Medium	23	H_M_23	1.99667	8.37585	2232	68.8325	31.0308	0.115843	7.97667	60.5933	0.29562	-0.218148	0.177457	19.9	15
Hoyo	Medium	24	H_M_24	1.99667	8.37585	2232	68.8325	31.0308	0.115843	7.97667	60.5933	0.29562	-0.218148	0.177457	17.8	18
Hoyo	Medium	25	H_M_25	1.99667	8.37585	2232	68.8325	31.0308	0.115843	7.97667	60.5933	0.29562	-0.218148	0.177457	39.8	12
Hoyo	Medium	26	H_M_26	1.99667	8.37585	2232	68.8325	31.0308	0.115843	7.97667	60.5933	0.29562	-0.218148	0.177457	31.4	18
Hoyo	Medium	27	H_M_27	1.99667	8.37585	2232	68.8325	31.0308	0.115843	7.97667	60.5933	0.29562	-0.218148	0.177457	58.4	70
Hoyo	Medium	28	H_M_28	1.99667	8.37585	2232	68.8325	31.0308	0.115843	7.97667	60.5933	0.29562	-0.218148	0.177457	32.6	38
Hoyo	Medium	29	H_M_29	1.99667	8.37585	2232	68.8325	31.0308	0.115843	7.97667	60.5933	0.29562	-0.218148	0.177457	24.5	8
Hoyo	Medium	30	H_M_30	1.99667	8.37585	2232	68.8325	31.0308	0.115843	7.97667	60.5933	0.29562	-0.218148	0.177457	26.1	17
Hoyo	Medium	31	H_M_31	1.99667	8.37585	2232	68.8325	31.0308	0.115843	7.97667	60.5933	0.29562	-0.218148	0.177457	34.4	23
Hoyo	Medium	32	H_M_32	1.99667	8.37585	2232	68.8325	31.0308	0.115843	7.97667	60.5933	0.29562	-0.218148	0.177457	27.4	30
Hoyo	Medium	33	H_M_33	1.99667	8.37585	2232	68.8325	31.0308	0.115843	7.97667	60.5933	0.29562	-0.218148	0.177457	20.5	22
Hoyo	Medium	34	H_M_34	1.99667	8.37585	2232	68.8325	31.0308	0.115843	7.97667	60.5933	0.29562	-0.218148	0.177457	17.3	18
Hoyo	Medium	35	H_M_35	1.99667	8.37585	2232	68.8325	31.0308	0.115843	7.97667	60.5933	0.29562	-0.218148	0.177457	18.6	16
Hoyo	Low	1	H_W_01	2.63	11.4443	2286	56.0551	35.3491	0.0953967	8.00667	53.2067	-0.0878993	-0.297565	-0.249367	29.8	41
Hoyo	Low	2	H_W_02	2.63	11.4443	2286	56.0551	35.3491	0.0953967	8.00667	53.2067	-0.0878993	-0.297565	-0.249367	29.4	30
Hoyo	Low	3	H_W_03	2.63	11.4443	2286	56.0551	35.3491	0.0953967	8.00667	53.2067	-0.0878993	-0.297565	-0.249367	13.5	50
Hoyo	Low	4	H_W_04	2.63	11.4443	2286	56.0551	35.3491	0.0953967	8.00667	53.2067	-0.0878993	-0.297565	-0.249367	67.6	65
Hoyo	Low	5	H_W_05	2.63	11.4443	2286	56.0551	35.3491	0.0953967	8.00667	53.2067	-0.0878993	-0.297565	-0.249367	10.3	40
Hoyo	Low	6	H_W_06	2.63	11.4443	2286	56.0551	35.3491	0.0953967	8.00667	53.2067	-0.0878993	-0.297565	-0.249367	30	46
Hoyo	Low	7	H_W_07	2.63	11.4443	2286	56.0551	35.3491	0.0953967	8.00667	53.2067	-0.0878993	-0.297565	-0.249367	10	28
Hoyo	Low	8	H_W_08	2.63	11.4443	2286	56.0551	35.3491	0.0953967	8.00667	53.2067	-0.0878993	-0.297565	-0.249367	49.3	62
Hoyo	Low	9	H_W_09	2.63	11.4443	2286	56.0551	35.3491	0.0953967	8.00667	53.2067	-0.0878993	-0.297565	-0.249367	28.1	47
Hoyo	Low	10	H_W_10	2.63	11.4443	2286	56.0551	35.3491	0.0953967	8.00667	53.2067	-0.0878993	-0.297565	-0.249367	23.5	54
Hoyo	Low	11	H_W_11	2.63	11.4443	2286	56.0551	35.3491	0.0953967	8.00667	53.2067	-0.0878993	-0.297565	-0.249367	11.7	46
Hoyo	Low	12	H_W_12	2.63	11.4443	2286	56.0551	35.3491	0.0953967	8.00667	53.2067	-0.0878993	-0.297565	-0.249367	35.9	52
Hoyo	Low	13	H_W_13	2.63	11.4443	2286	56.0551	35.3491	0.0953967	8.00667	53.2067	-0.0878993	-0.297565	-0.249367	43	72
Hoyo	Low	14	H_W_14	2.63	11.4443	2286	56.0551	35.3491	0.0953967	8.00667	53.2067	-0.0878993	-0.297565	-0.249367	56.9	46
Hoyo	Low	15	H_W_15	2.63	11.4443	2286	56.0551	35.3491	0.0953967	8.00667	53.2067	-0.0878993	-0.297565	-0.249367	19.9	51
Hoyo	Low	16	H_W_16	2.63	11.4443	2286	56.0551	35.3491	0.0953967	8.00667	53.2067	-0.0878993	-0.297565	-0.249367	25.8	34
Hoyo	Low	17	H_W_17	2.63	11.4443	2286	56.0551	35.3491	0.0953967	8.00667	53.2067	-0.0878993	-0.297565	-0.249367	15.4	39
Hoyo	Low	18	H_W_18	2.63	11.4443	2286	56.0551	35.3491	0.0953967	8.00667	53.2067	-0.0878993	-0.297565	-0.249367	14.8	29
Hoyo	Low	19	H_W_19	2.63	11.4443	2286	56.0551	35.3491	0.0953967	8.00667	53.2067	-0.0878993	-0.297565	-0.249367	21	36
Hoyo	Low	20	H_W_20	2.63	11.4443	2286	56.0551	35.3491	0.0953967	8.00667	53.2067	-0.0878993	-0.297565	-0.249367	11.7	39
Hoyo	Low	21	H_W_21	2.63	11.4443	2286	56.0551	35.3491	0.0953967	8.00667	53.2067	-0.0878993	-0.297565	-0.249367	23.9	62
Hoyo	Low	22	H_W_22	2.63	11.4443	2286	56.0551	35.3491	0.0953967	8.00667	53.2067	-0.0878993	-0.297565	-0.249367	18.7	67
Hoyo	Low	23	H_W_23	2.63	11.4443	2286	56.0551	35.3491	0.0953967	8.00667	53.2067	-0.0878993	-0.297565	-0.249367	37.9	55
Hoyo	Low	24	H_W_24	2.63	11.4443	2286	56.0551	35.3491	0.0953967	8.00667	53.2067	-0.0878993	-0.297565	-0.249367	15.2	37
Hoyo	Low	25	H_W_25	2.63	11.4443	2286	56.0551	35.3491	0.0953967	8.00667	53.2067	-0.0878993	-0.297565	-0.249367	14.5	75
Hoyo	Low	26	H_W_26	2.63	11.4443	2286	56.0551	35.3491	0.0953967	8.00667	53.2067	-0.0878993	-0.297565	-0.249367	5.2	17
Hoyo	Low	27	H_W_27	2.63	11.4443	2286	56.0551	35.3491	0.0953967	8.00667	53.2067	-0.0878993	-0.297565	-0.249367	9.7	33
Hoyo	Low	28	H_W_28	2.63	11.4443	2286	56.0551	35.3491	0.0953967	8.00667	53.2067	-0.0878993	-0.297565	-0.249367	11.3	34
Hoyo	Low	29	H_W_29	2.63	11.4443	2286	56.0551	35.3491	0.0953967	8.00667	53.2067	-0.0878993	-0.297565	-0.249367	38.2	45
Hoyo	Low	30	H_W_30	2.63	11.4443	2286	56.0551	35.3491	0.0953967	8.00667	53.2067	-0.0878993	-0.297565	-0.249367	29.3	45
Hoyo	Low	31	H_W_31	2.63	11.4443	2286	56.0551	35.3491	0.0953967	8.00667	53.2067	-0.0878993	-0.297565	-0.249367	21.2	80
Hoyo	Low	32	H_W_32	2.63	11.4443	2286	56.0551	35.3491	0.0953967	8.00667	53.2067	-0.0878993	-0.297565	-0.249367	19.5	43
Hoyo	Low	33	H_W_33	2.63	11.4443	2286	56.0551	35.3491	0.0953967	8.00667	53.2067	-0.0878993	-0.297565	-0.249367	8.8	54
Hoyo	Low	34	H_W_34	2.63	11.4443	2286	56.0551	35.3491	0.0953967	8.00667	53.2067	-0.0878993	-0.297565	-0.249367	19.3	60
Hoyo	Low	35	H_W_35	2.63	11.4443	2286	56.0551	35.3491	0.0953967	8.00667	53.2067	-0.0878993	-0.297565	-0.249367	10.9	54
Pedriza	High	1	P_H_01	1.79333	8.08754	2276	64.2524	32.8125	0.08591	8.02	59.1	0.231631	0.0239041	-0.0913116	15	6
Pedriza	High	2	P_H_02	1.79333	8.08754	2276	64.2524	32.8125	0.08591	8.02	59.1	0.231631	0.0239041	-0.0913116	11.5	25
Pedriza	High	3	P_H_03	1.79333	8.08754	2276	64.2524	32.8125	0.08591	8.02	59.1	0.231631	0.0239041	-0.0913116	15.5	21
Pedriza	High	4	P_H_04	1.79333	8.08754	2276	64.2524	32.8125	0.08591	8.02	59.1	0.231631	0.0239041	-0.0913116	26	18
Pedriza	High	5	P_H_05	1.79333	8.08754	2276	64.2524	32.8125	0.08591	8.02	59.1	0.231631	0.0239041	-0.0913116	38.2	18
Pedriza	High	6	P_H_06	1.79333	8.08754	2276	64.2524	32.8125	0.08591	8.02	59.1	0.231631	0.0239041	-0.0913116	60.1	28
Pedriza	High	7	P_H_07	1.79333	8.08754	2276	64.2524	32.8125	0.08591	8.02	59.1	0.231631	0.0239041	-0.0913116	28.5	22
Pedriza	High	8	P_H_08	1.79333	8.08754	2276	64.2524	32.8125	0.08591	8.02	59.1	0.231631	0.0239041	-0.0913116	34.6	16
Pedriza	High	9	P_H_09	1.79333	8.08754	2276	64.2524	32.8125	0.08591	8.02	59.1	0.231631	0.0239041	-0.0913116	25	10
Pedriza	High	10	P_H_10	1.79333	8.08754	2276	64.2524	32.8125	0.08591	8.02	59.1	0.231631	0.0239041	-0.0913116	16.8	8
Pedriza	High	11	P_H_11	1.79333	8.08754	2276	64.2524	32.8125	0.08591	8.02	59.1	0.231631	0.0239041	-0.0913116	31	16
Pedriza	High	12	P_H_12	1.79333	8.08754	2276	64.2524	32.8125	0.08591	8.02	59.1	0.231631	0.0239041	-0.0913116	27.9	8
Pedriza	High	13	P_H_13	1.79333	8.08754	2276	64.2524	32.8125	0.08591	8.02	59.1	0.231631	0.0239041	-0.0913116	40.7	6
Pedriza	High	14	P_H_14	1.79333	8.08754	2276	64.2524	32.8125	0.08591	8.02	59.1	0.231631	0.0239041	-0.0913116	24.5	14
Pedriza	High	15	P_H_15	1.79333	8.08754	2276	64.2524	32.8125	0.08591	8.02	59.1	0.231631	0.0239041	-0.0913116	12.9	18
Pedriza	High	16	P_H_16	1.79333	8.08754	2276	64.2524	32.8125	0.08591	8.02	59.1	0.231631	0.0239041	-0.0913116	21.4	24
Pedriza	High	17	P_H_17	1.79333	8.08754	2276	64.2524	32.8125	0.08591	8.02	59.1	0.231631	0.0239041	-0.0913116	28.6	27
Pedriza	High	18	P_H_18	1.79333	8.08754	2276	64.2524	32.8125	0.08591	8.02	59.1	0.231631	0.0239041	-0.0913116	8	8
Pedriza	High	19	P_H_19	1.79333	8.08754	2276	64.2524	32.8125	0.08591	8.02	59.1	0.231631	0.0239041	-0.0913116	14.7	10
Pedriza	High	20	P_H_20	1.79333	8.08754	2276	64.2524	32.8125	0.08591	8.02	59.1	0.231631	0.0239041	-0.0913116	21.8	40
Pedriza	High	21	P_H_21	1.79333	8.08754	2276	64.2524	32.8125	0.08591	8.02	59.1	0.231631	0.0239041	-0.0913116	42.1	8
Pedriza	High	22	P_H_22	1.79333	8.08754	2276	64.2524	32.8125	0.08591	8.02	59.1	0.231631	0.0239041	-0.0913116	20.4	23
Pedriza	High	23	P_H_23	1.79333	8.08754	2276	64.2524	32.8125	0.08591	8.02	59.1	0.231631	0.0239041	-0.0913116	12.3	12
Pedriza	High	24	P_H_24	1.79333	8.08754	2276	64.2524	32.8125	0.08591	8.02	59.1	0.231631	0.0239041	-0.0913116	39.5	33
Pedriza	High	25	P_H_25	1.79333	8.08754	2276	64.2524	32.8125	0.08591	8.02	59.1	0.231631	0.0239041	-0.0913116	21.7	16
Pedriza	High	26	P_H_26	1.79333	8.08754	2276	64.2524	32.8125	0.08591	8.02	59.1	0.231631	0.0239041	-0.0913116	25.3	25
Pedriza	High	27	P_H_27	1.79333	8.08754	2276	64.2524	32.8125	0.08591	8.02	59.1	0.231631	0.0239041	-0.0913116	18.2	18
Pedriza	High	28	P_H_28	1.79333	8.08754	2276	64.2524	32.8125	0.08591	8.02	59.1	0.231631	0.0239041	-0.0913116	27.6	12
Pedriza	High	29	P_H_29	1.79333	8.08754	2276	64.2524	32.8125	0.08591	8.02	59.1	0.231631	0.0239041	-0.0913116	18.8	25
Pedriza	High	30	P_H_30	1.79333	8.08754	2276	64.2524	32.8125	0.08591	8.02	59.1	0.231631	0.0239041	-0.0913116	21.8	7
Pedriza	High	31	P_H_31	1.79333	8.08754	2276	64.2524	32.8125	0.08591	8.02	59.1	0.231631	0.0239041	-0.0913116	31	40
Pedriza	High	32	P_H_32	1.79333	8.08754	2276	64.2524	32.8125	0.08591	8.02	59.1	0.231631	0.0239041	-0.0913116	30	25
Pedriza	High	33	P_H_33	1.79333	8.08754	2276	64.2524	32.8125	0.08591	8.02	59.1	0.231631	0.0239041	-0.0913116	25.5	10
Pedriza	High	34	P_H_34	1.79333	8.08754	2276	64.2524	32.8125	0.08591	8.02	59.1	0.231631	0.0239041	-0.0913116	8.6	8
Pedriza	High	35	P_H_35	1.79333	8.08754	2276	64.2524	32.8125	0.08591	8.02	59.1	0.231631	0.0239041	-0.0913116	12.3	8
Pedriza	Medium	1	P_M_01	1.26767	11.1868	2231.33	87.772	36.5032	0.0762567	8.01333	52.31	-0.244409	0.277114	0.0931382	21.9	26
Pedriza	Medium	2	P_M_02	1.26767	11.1868	2231.33	87.772	36.5032	0.0762567	8.01333	52.31	-0.244409	0.277114	0.0931382	34	52
Pedriza	Medium	3	P_M_03	1.26767	11.1868	2231.33	87.772	36.5032	0.0762567	8.01333	52.31	-0.244409	0.277114	0.0931382	21.5	31
Pedriza	Medium	4	P_M_04	1.26767	11.1868	2231.33	87.772	36.5032	0.0762567	8.01333	52.31	-0.244409	0.277114	0.0931382	15.6	38
Pedriza	Medium	5	P_M_05	1.26767	11.1868	2231.33	87.772	36.5032	0.0762567	8.01333	52.31	-0.244409	0.277114	0.0931382	21.5	32
Pedriza	Medium	6	P_M_06	1.26767	11.1868	2231.33	87.772	36.5032	0.0762567	8.01333	52.31	-0.244409	0.277114	0.0931382	23.5	13
Pedriza	Medium	7	P_M_07	1.26767	11.1868	2231.33	87.772	36.5032	0.0762567	8.01333	52.31	-0.244409	0.277114	0.0931382	30.9	14
Pedriza	Medium	8	P_M_08	1.26767	11.1868	2231.33	87.772	36.5032	0.0762567	8.01333	52.31	-0.244409	0.277114	0.0931382	43.7	24
Pedriza	Medium	9	P_M_09	1.26767	11.1868	2231.33	87.772	36.5032	0.0762567	8.01333	52.31	-0.244409	0.277114	0.0931382	28.2	6
Pedriza	Medium	10	P_M_10	1.26767	11.1868	2231.33	87.772	36.5032	0.0762567	8.01333	52.31	-0.244409	0.277114	0.0931382	21.8	13
Pedriza	Medium	11	P_M_11	1.26767	11.1868	2231.33	87.772	36.5032	0.0762567	8.01333	52.31	-0.244409	0.277114	0.0931382	16.5	9
Pedriza	Medium	12	P_M_12	1.26767	11.1868	2231.33	87.772	36.5032	0.0762567	8.01333	52.31	-0.244409	0.277114	0.0931382	20.6	7
Pedriza	Medium	13	P_M_13	1.26767	11.1868	2231.33	87.772	36.5032	0.0762567	8.01333	52.31	-0.244409	0.277114	0.0931382	28.8	31
Pedriza	Medium	14	P_M_14	1.26767	11.1868	2231.33	87.772	36.5032	0.0762567	8.01333	52.31	-0.244409	0.277114	0.0931382	33.2	32
Pedriza	Medium	15	P_M_15	1.26767	11.1868	2231.33	87.772	36.5032	0.0762567	8.01333	52.31	-0.244409	0.277114	0.0931382	43.4	44
Pedriza	Medium	16	P_M_16	1.26767	11.1868	2231.33	87.772	36.5032	0.0762567	8.01333	52.31	-0.244409	0.277114	0.0931382	75.3	38
Pedriza	Medium	17	P_M_17	1.26767	11.1868	2231.33	87.772	36.5032	0.0762567	8.01333	52.31	-0.244409	0.277114	0.0931382	60.8	54
Pedriza	Medium	18	P_M_18	1.26767	11.1868	2231.33	87.772	36.5032	0.0762567	8.01333	52.31	-0.244409	0.277114	0.0931382	42.7	45
Pedriza	Medium	19	P_M_19	1.26767	11.1868	2231.33	87.772	36.5032	0.0762567	8.01333	52.31	-0.244409	0.277114	0.0931382	28.5	37
Pedriza	Medium	20	P_M_20	1.26767	11.1868	2231.33	87.772	36.5032	0.0762567	8.01333	52.31	-0.244409	0.277114	0.0931382	20.5	33
Pedriza	Medium	21	P_M_21	1.26767	11.1868	2231.33	87.772	36.5032	0.0762567	8.01333	52.31	-0.244409	0.277114	0.0931382	30	41
Pedriza	Medium	22	P_M_22	1.26767	11.1868	2231.33	87.772	36.5032	0.0762567	8.01333	52.31	-0.244409	0.277114	0.0931382	30.1	15
Pedriza	Medium	23	P_M_23	1.26767	11.1868	2231.33	87.772	36.5032	0.0762567	8.01333	52.31	-0.244409	0.277114	0.0931382	47.6	30
Pedriza	Medium	24	P_M_24	1.26767	11.1868	2231.33	87.772	36.5032	0.0762567	8.01333	52.31	-0.244409	0.277114	0.0931382	40.5	48
Pedriza	Medium	25	P_M_25	1.26767	11.1868	2231.33	87.772	36.5032	0.0762567	8.01333	52.31	-0.244409	0.277114	0.0931382	39.8	38
Pedriza	Medium	26	P_M_26	1.26767	11.1868	2231.33	87.772	36.5032	0.0762567	8.01333	52.31	-0.244409	0.277114	0.0931382	28.2	27
Pedriza	Medium	27	P_M_27	1.26767	11.1868	2231.33	87.772	36.5032	0.0762567	8.01333	52.31	-0.244409	0.277114	0.0931382	59.9	47
Pedriza	Medium	28	P_M_28	1.26767	11.1868	2231.33	87.772	36.5032	0.0762567	8.01333	52.31	-0.244409	0.277114	0.0931382	32.1	44
Pedriza	Medium	29	P_M_29	1.26767	11.1868	2231.33	87.772	36.5032	0.0762567	8.01333	52.31	-0.244409	0.277114	0.0931382	38.5	37
Pedriza	Medium	30	P_M_30	1.26767	11.1868	2231.33	87.772	36.5032	0.0762567	8.01333	52.31	-0.244409	0.277114	0.0931382	23	22
Pedriza	Medium	31	P_M_31	1.26767	11.1868	2231.33	87.772	36.5032	0.0762567	8.01333	52.31	-0.244409	0.277114	0.0931382	42.5	16
Pedriza	Medium	32	P_M_32	1.26767	11.1868	2231.33	87.772	36.5032	0.0762567	8.01333	52.31	-0.244409	0.277114	0.0931382	50.6	45
Pedriza	Medium	33	P_M_33	1.26767	11.1868	2231.33	87.772	36.5032	0.0762567	8.01333	52.31	-0.244409	0.277114	0.0931382	32.8	30
Pedriza	Medium	34	P_M_34	1.26767	11.1868	2231.33	87.772	36.5032	0.0762567	8.01333	52.31	-0.244409	0.277114	0.0931382	30.6	34
Pedriza	Medium	35	P_M_35	1.26767	11.1868	2231.33	87.772	36.5032	0.0762567	8.01333	52.31	-0.244409	0.277114	0.0931382	37.9	17
Pedriza	Low	1	P_W_01	2.04	9.65264	2239.33	80.5997	35.104	0.0710067	8.03	55.2433	-0.0910036	0.15006	-0.0463739	32.7	25
Pedriza	Low	2	P_W_02	2.04	9.65264	2239.33	80.5997	35.104	0.0710067	8.03	55.2433	-0.0910036	0.15006	-0.0463739	31.5	16
Pedriza	Low	3	P_W_03	2.04	9.65264	2239.33	80.5997	35.104	0.0710067	8.03	55.2433	-0.0910036	0.15006	-0.0463739	31.45	16
Pedriza	Low	4	P_W_04	2.04	9.65264	2239.33	80.5997	35.104	0.0710067	8.03	55.2433	-0.0910036	0.15006	-0.0463739	38.9	18
Pedriza	Low	5	P_W_05	2.04	9.65264	2239.33	80.5997	35.104	0.0710067	8.03	55.2433	-0.0910036	0.15006	-0.0463739	48.7	22
Pedriza	Low	6	P_W_06	2.04	9.65264	2239.33	80.5997	35.104	0.0710067	8.03	55.2433	-0.0910036	0.15006	-0.0463739	38.7	20
Pedriza	Low	7	P_W_07	2.04	9.65264	2239.33	80.5997	35.104	0.0710067	8.03	55.2433	-0.0910036	0.15006	-0.0463739	65.7	23
Pedriza	Low	8	P_W_08	2.04	9.65264	2239.33	80.5997	35.104	0.0710067	8.03	55.2433	-0.0910036	0.15006	-0.0463739	49.7	36
Pedriza	Low	9	P_W_09	2.04	9.65264	2239.33	80.5997	35.104	0.0710067	8.03	55.2433	-0.0910036	0.15006	-0.0463739	26.5	24
Pedriza	Low	10	P_W_10	2.04	9.65264	2239.33	80.5997	35.104	0.0710067	8.03	55.2433	-0.0910036	0.15006	-0.0463739	31.7	11
Pedriza	Low	11	P_W_11	2.04	9.65264	2239.33	80.5997	35.104	0.0710067	8.03	55.2433	-0.0910036	0.15006	-0.0463739	36.5	26
Pedriza	Low	12	P_W_12	2.04	9.65264	2239.33	80.5997	35.104	0.0710067	8.03	55.2433	-0.0910036	0.15006	-0.0463739	34.5	18
Pedriza	Low	13	P_W_13	2.04	9.65264	2239.33	80.5997	35.104	0.0710067	8.03	55.2433	-0.0910036	0.15006	-0.0463739	25.5	17
Pedriza	Low	14	P_W_14	2.04	9.65264	2239.33	80.5997	35.104	0.0710067	8.03	55.2433	-0.0910036	0.15006	-0.0463739	56.6	27
Pedriza	Low	15	P_W_15	2.04	9.65264	2239.33	80.5997	35.104	0.0710067	8.03	55.2433	-0.0910036	0.15006	-0.0463739	29.5	25
Pedriza	Low	16	P_W_16	2.04	9.65264	2239.33	80.5997	35.104	0.0710067	8.03	55.2433	-0.0910036	0.15006	-0.0463739	49.7	23
Pedriza	Low	17	P_W_17	2.04	9.65264	2239.33	80.5997	35.104	0.0710067	8.03	55.2433	-0.0910036	0.15006	-0.0463739	36.95	20
Pedriza	Low	18	P_W_18	2.04	9.65264	2239.33	80.5997	35.104	0.0710067	8.03	55.2433	-0.0910036	0.15006	-0.0463739	35.8	20
Pedriza	Low	19	P_W_19	2.04	9.65264	2239.33	80.5997	35.104	0.0710067	8.03	55.2433	-0.0910036	0.15006	-0.0463739	34.7	20
Pedriza	Low	20	P_W_20	2.04	9.65264	2239.33	80.5997	35.104	0.0710067	8.03	55.2433	-0.0910036	0.15006	-0.0463739	39.5	22
Pedriza	Low	21	P_W_21	2.04	9.65264	2239.33	80.5997	35.104	0.0710067	8.03	55.2433	-0.0910036	0.15006	-0.0463739	34.3	23
Pedriza	Low	22	P_W_22	2.04	9.65264	2239.33	80.5997	35.104	0.0710067	8.03	55.2433	-0.0910036	0.15006	-0.0463739	34.6	25
Pedriza	Low	23	P_W_23	2.04	9.65264	2239.33	80.5997	35.104	0.0710067	8.03	55.2433	-0.0910036	0.15006	-0.0463739	27.3	18
Pedriza	Low	24	P_W_24	2.04	9.65264	2239.33	80.5997	35.104	0.0710067	8.03	55.2433	-0.0910036	0.15006	-0.0463739	29.3	26
Pedriza	Low	25	P_W_25	2.04	9.65264	2239.33	80.5997	35.104	0.0710067	8.03	55.2433	-0.0910036	0.15006	-0.0463739	30.8	25
Pedriza	Low	26	P_W_26	2.04	9.65264	2239.33	80.5997	35.104	0.0710067	8.03	55.2433	-0.0910036	0.15006	-0.0463739	30.5	28
Pedriza	Low	27	P_W_27	2.04	9.65264	2239.33	80.5997	35.104	0.0710067	8.03	55.2433	-0.0910036	0.15006	-0.0463739	24.2	23
Pedriza	Low	28	P_W_28	2.04	9.65264	2239.33	80.5997	35.104	0.0710067	8.03	55.2433	-0.0910036	0.15006	-0.0463739	41.8	34
Pedriza	Low	29	P_W_29	2.04	9.65264	2239.33	80.5997	35.104	0.0710067	8.03	55.2433	-0.0910036	0.15006	-0.0463739	33.7	16
Pedriza	Low	30	P_W_30	2.04	9.65264	2239.33	80.5997	35.104	0.0710067	8.03	55.2433	-0.0910036	0.15006	-0.0463739	88.5	22
Pedriza	Low	31	P_W_31	2.04	9.65264	2239.33	80.5997	35.104	0.0710067	8.03	55.2433	-0.0910036	0.15006	-0.0463739	28	15
Pedriza	Low	32	P_W_32	2.04	9.65264	2239.33	80.5997	35.104	0.0710067	8.03	55.2433	-0.0910036	0.15006	-0.0463739	94	30
Pedriza	Low	33	P_W_33	2.04	9.65264	2239.33	80.5997	35.104	0.0710067	8.03	55.2433	-0.0910036	0.15006	-0.0463739	64.75	16
Pedriza	Low	34	P_W_34	2.04	9.65264	2239.33	80.5997	35.104	0.0710067	8.03	55.2433	-0.0910036	0.15006	-0.0463739	65.4	12
Pedriza	Low	35	P_W_35	2.04	9.65264	2239.33	80.5997	35.104	0.0710067	8.03	55.2433	-0.0910036	0.15006	-0.0463739	67	12
Valdemolino	High	1	V_H_01	1.117	7.11966	2357.33	83.7069	32.9403	0.0703967	8.06333	59.94	0.320585	0.477651	-0.133194	20.9	38
Valdemolino	High	2	V_H_02	1.117	7.11966	2357.33	83.7069	32.9403	0.0703967	8.06333	59.94	0.320585	0.477651	-0.133194	18.1	35
Valdemolino	High	3	V_H_03	1.117	7.11966	2357.33	83.7069	32.9403	0.0703967	8.06333	59.94	0.320585	0.477651	-0.133194	17.6	31
Valdemolino	High	4	V_H_04	1.117	7.11966	2357.33	83.7069	32.9403	0.0703967	8.06333	59.94	0.320585	0.477651	-0.133194	22.8	38
Valdemolino	High	5	V_H_05	1.117	7.11966	2357.33	83.7069	32.9403	0.0703967	8.06333	59.94	0.320585	0.477651	-0.133194	15.5	15
Valdemolino	High	6	V_H_06	1.117	7.11966	2357.33	83.7069	32.9403	0.0703967	8.06333	59.94	0.320585	0.477651	-0.133194	17	15
Valdemolino	High	7	V_H_07	1.117	7.11966	2357.33	83.7069	32.9403	0.0703967	8.06333	59.94	0.320585	0.477651	-0.133194	23.3	54
Valdemolino	High	8	V_H_08	1.117	7.11966	2357.33	83.7069	32.9403	0.0703967	8.06333	59.94	0.320585	0.477651	-0.133194	15.4	27
Valdemolino	High	9	V_H_09	1.117	7.11966	2357.33	83.7069	32.9403	0.0703967	8.06333	59.94	0.320585	0.477651	-0.133194	16.7	25
Valdemolino	High	10	V_H_10	1.117	7.11966	2357.33	83.7069	32.9403	0.0703967	8.06333	59.94	0.320585	0.477651	-0.133194	16.1	33
Valdemolino	High	11	V_H_11	1.117	7.11966	2357.33	83.7069	32.9403	0.0703967	8.06333	59.94	0.320585	0.477651	-0.133194	17	42
Valdemolino	High	12	V_H_12	1.117	7.11966	2357.33	83.7069	32.9403	0.0703967	8.06333	59.94	0.320585	0.477651	-0.133194	13.1	12
Valdemolino	High	13	V_H_13	1.117	7.11966	2357.33	83.7069	32.9403	0.0703967	8.06333	59.94	0.320585	0.477651	-0.133194	15.2	39
Valdemolino	High	14	V_H_14	1.117	7.11966	2357.33	83.7069	32.9403	0.0703967	8.06333	59.94	0.320585	0.477651	-0.133194	18.8	31
Valdemolino	High	15	V_H_15	1.117	7.11966	2357.33	83.7069	32.9403	0.0703967	8.06333	59.94	0.320585	0.477651	-0.133194	22.1	20
Valdemolino	High	16	V_H_16	1.117	7.11966	2357.33	83.7069	32.9403	0.0703967	8.06333	59.94	0.320585	0.477651	-0.133194	13.5	13
Valdemolino	High	17	V_H_17	1.117	7.11966	2357.33	83.7069	32.9403	0.0703967	8.06333	59.94	0.320585	0.477651	-0.133194	18.3	30
Valdemolino	High	18	V_H_18	1.117	7.11966	2357.33	83.7069	32.9403	0.0703967	8.06333	59.94	0.320585	0.477651	-0.133194	8.6	10
Valdemolino	High	19	V_H_19	1.117	7.11966	2357.33	83.7069	32.9403	0.0703967	8.06333	59.94	0.320585	0.477651	-0.133194	18.2	13
Valdemolino	High	20	V_H_20	1.117	7.11966	2357.33	83.7069	32.9403	0.0703967	8.06333	59.94	0.320585	0.477651	-0.133194	13.6	20
Valdemolino	High	21	V_H_21	1.117	7.11966	2357.33	83.7069	32.9403	0.0703967	8.06333	59.94	0.320585	0.477651	-0.133194	30.3	60
Valdemolino	High	22	V_H_22	1.117	7.11966	2357.33	83.7069	32.9403	0.0703967	8.06333	59.94	0.320585	0.477651	-0.133194	18.3	10
Valdemolino	High	23	V_H_23	1.117	7.11966	2357.33	83.7069	32.9403	0.0703967	8.06333	59.94	0.320585	0.477651	-0.133194	23.1	22
Valdemolino	High	24	V_H_24	1.117	7.11966	2357.33	83.7069	32.9403	0.0703967	8.06333	59.94	0.320585	0.477651	-0.133194	55.1	47
Valdemolino	High	25	V_H_25	1.117	7.11966	2357.33	83.7069	32.9403	0.0703967	8.06333	59.94	0.320585	0.477651	-0.133194	20.8	20
Valdemolino	High	26	V_H_26	1.117	7.11966	2357.33	83.7069	32.9403	0.0703967	8.06333	59.94	0.320585	0.477651	-0.133194	21.8	15
Valdemolino	High	27	V_H_27	1.117	7.11966	2357.33	83.7069	32.9403	0.0703967	8.06333	59.94	0.320585	0.477651	-0.133194	26.1	19
Valdemolino	High	28	V_H_28	1.117	7.11966	2357.33	83.7069	32.9403	0.0703967	8.06333	59.94	0.320585	0.477651	-0.133194	23.4	22
Valdemolino	High	29	V_H_29	1.117	7.11966	2357.33	83.7069	32.9403	0.0703967	8.06333	59.94	0.320585	0.477651	-0.133194	51.5	45
Valdemolino	High	30	V_H_30	1.117	7.11966	2357.33	83.7069	32.9403	0.0703967	8.06333	59.94	0.320585	0.477651	-0.133194	16.1	13
Valdemolino	High	31	V_H_31	1.117	7.11966	2357.33	83.7069	32.9403	0.0703967	8.06333	59.94	0.320585	0.477651	-0.133194	20.5	35
Valdemolino	High	32	V_H_32	1.117	7.11966	2357.33	83.7069	32.9403	0.0703967	8.06333	59.94	0.320585	0.477651	-0.133194	18.8	22
Valdemolino	High	33	V_H_33	1.117	7.11966	2357.33	83.7069	32.9403	0.0703967	8.06333	59.94	0.320585	0.477651	-0.133194	25.2	42
Valdemolino	High	34	V_H_34	1.117	7.11966	2357.33	83.7069	32.9403	0.0703967	8.06333	59.94	0.320585	0.477651	-0.133194	21.5	45
Valdemolino	High	35	V_H_35	1.117	7.11966	2357.33	83.7069	32.9403	0.0703967	8.06333	59.94	0.320585	0.477651	-0.133194	19.7	12
Valdemolino	Medium	1	V_M_01	2.83667	11.8561	2274.67	73.551	38.1072	0.0644567	8.00333	50.0367	-0.385283	-0.0778965	-0.196461	35.2	14
Valdemolino	Medium	2	V_M_02	2.83667	11.8561	2274.67	73.551	38.1072	0.0644567	8.00333	50.0367	-0.385283	-0.0778965	-0.196461	36	40
Valdemolino	Medium	3	V_M_03	2.83667	11.8561	2274.67	73.551	38.1072	0.0644567	8.00333	50.0367	-0.385283	-0.0778965	-0.196461	51.6	45
Valdemolino	Medium	4	V_M_04	2.83667	11.8561	2274.67	73.551	38.1072	0.0644567	8.00333	50.0367	-0.385283	-0.0778965	-0.196461	29.3	14
Valdemolino	Medium	5	V_M_05	2.83667	11.8561	2274.67	73.551	38.1072	0.0644567	8.00333	50.0367	-0.385283	-0.0778965	-0.196461	13.3	12
Valdemolino	Medium	6	V_M_06	2.83667	11.8561	2274.67	73.551	38.1072	0.0644567	8.00333	50.0367	-0.385283	-0.0778965	-0.196461	12.4	16
Valdemolino	Medium	7	V_M_07	2.83667	11.8561	2274.67	73.551	38.1072	0.0644567	8.00333	50.0367	-0.385283	-0.0778965	-0.196461	43.5	4
Valdemolino	Medium	8	V_M_08	2.83667	11.8561	2274.67	73.551	38.1072	0.0644567	8.00333	50.0367	-0.385283	-0.0778965	-0.196461	21.4	16
Valdemolino	Medium	9	V_M_09	2.83667	11.8561	2274.67	73.551	38.1072	0.0644567	8.00333	50.0367	-0.385283	-0.0778965	-0.196461	18.8	18
Valdemolino	Medium	10	V_M_10	2.83667	11.8561	2274.67	73.551	38.1072	0.0644567	8.00333	50.0367	-0.385283	-0.0778965	-0.196461	16.6	14
Valdemolino	Medium	11	V_M_11	2.83667	11.8561	2274.67	73.551	38.1072	0.0644567	8.00333	50.0367	-0.385283	-0.0778965	-0.196461	15.7	28
Valdemolino	Medium	12	V_M_12	2.83667	11.8561	2274.67	73.551	38.1072	0.0644567	8.00333	50.0367	-0.385283	-0.0778965	-0.196461	22.1	36
Valdemolino	Medium	13	V_M_13	2.83667	11.8561	2274.67	73.551	38.1072	0.0644567	8.00333	50.0367	-0.385283	-0.0778965	-0.196461	15.6	15
Valdemolino	Medium	14	V_M_14	2.83667	11.8561	2274.67	73.551	38.1072	0.0644567	8.00333	50.0367	-0.385283	-0.0778965	-0.196461	14.6	14
Valdemolino	Medium	15	V_M_15	2.83667	11.8561	2274.67	73.551	38.1072	0.0644567	8.00333	50.0367	-0.385283	-0.0778965	-0.196461	11.8	9
Valdemolino	Medium	16	V_M_16	2.83667	11.8561	2274.67	73.551	38.1072	0.0644567	8.00333	50.0367	-0.385283	-0.0778965	-0.196461	25.6	64
Valdemolino	Medium	17	V_M_17	2.83667	11.8561	2274.67	73.551	38.1072	0.0644567	8.00333	50.0367	-0.385283	-0.0778965	-0.196461	25.3	9
Valdemolino	Medium	18	V_M_18	2.83667	11.8561	2274.67	73.551	38.1072	0.0644567	8.00333	50.0367	-0.385283	-0.0778965	-0.196461	21.6	12
Valdemolino	Medium	19	V_M_19	2.83667	11.8561	2274.67	73.551	38.1072	0.0644567	8.00333	50.0367	-0.385283	-0.0778965	-0.196461	41.8	40
Valdemolino	Medium	20	V_M_20	2.83667	11.8561	2274.67	73.551	38.1072	0.0644567	8.00333	50.0367	-0.385283	-0.0778965	-0.196461	25.7	45
Valdemolino	Medium	21	V_M_21	2.83667	11.8561	2274.67	73.551	38.1072	0.0644567	8.00333	50.0367	-0.385283	-0.0778965	-0.196461	20.1	12
Valdemolino	Medium	22	V_M_22	2.83667	11.8561	2274.67	73.551	38.1072	0.0644567	8.00333	50.0367	-0.385283	-0.0778965	-0.196461	32.5	70
Valdemolino	Medium	23	V_M_23	2.83667	11.8561	2274.67	73.551	38.1072	0.0644567	8.00333	50.0367	-0.385283	-0.0778965	-0.196461	32.5	48
Valdemolino	Medium	24	V_M_24	2.83667	11.8561	2274.67	73.551	38.1072	0.0644567	8.00333	50.0367	-0.385283	-0.0778965	-0.196461	20.8	10
Valdemolino	Medium	25	V_M_25	2.83667	11.8561	2274.67	73.551	38.1072	0.0644567	8.00333	50.0367	-0.385283	-0.0778965	-0.196461	20.6	14
Valdemolino	Medium	26	V_M_26	2.83667	11.8561	2274.67	73.551	38.1072	0.0644567	8.00333	50.0367	-0.385283	-0.0778965	-0.196461	23.7	14
Valdemolino	Medium	27	V_M_27	2.83667	11.8561	2274.67	73.551	38.1072	0.0644567	8.00333	50.0367	-0.385283	-0.0778965	-0.196461	27.6	40
Valdemolino	Medium	28	V_M_28	2.83667	11.8561	2274.67	73.551	38.1072	0.0644567	8.00333	50.0367	-0.385283	-0.0778965	-0.196461	17.1	17
Valdemolino	Medium	29	V_M_29	2.83667	11.8561	2274.67	73.551	38.1072	0.0644567	8.00333	50.0367	-0.385283	-0.0778965	-0.196461	15.9	9
Valdemolino	Medium	30	V_M_30	2.83667	11.8561	2274.67	73.551	38.1072	0.0644567	8.00333	50.0367	-0.385283	-0.0778965	-0.196461	29.4	29
Valdemolino	Medium	31	V_M_31	2.83667	11.8561	2274.67	73.551	38.1072	0.0644567	8.00333	50.0367	-0.385283	-0.0778965	-0.196461	26.4	30
Valdemolino	Medium	32	V_M_32	2.83667	11.8561	2274.67	73.551	38.1072	0.0644567	8.00333	50.0367	-0.385283	-0.0778965	-0.196461	27.1	37
Valdemolino	Medium	33	V_M_33	2.83667	11.8561	2274.67	73.551	38.1072	0.0644567	8.00333	50.0367	-0.385283	-0.0778965	-0.196461	26	21
Valdemolino	Medium	34	V_M_34	2.83667	11.8561	2274.67	73.551	38.1072	0.0644567	8.00333	50.0367	-0.385283	-0.0778965	-0.196461	16.4	21
Valdemolino	Medium	35	V_M_35	2.83667	11.8561	2274.67	73.551	38.1072	0.0644567	8.00333	50.0367	-0.385283	-0.0778965	-0.196461	10.7	12
Valdemolino	Low	1	V_W_01	2.50333	9.02454	2235	77.4649	35.6288	0.100453	7.98	55.3467	-0.0427518	-0.191246	0.140216	31.8	27
Valdemolino	Low	2	V_W_02	2.50333	9.02454	2235	77.4649	35.6288	0.100453	7.98	55.3467	-0.0427518	-0.191246	0.140216	29.2	55
Valdemolino	Low	3	V_W_03	2.50333	9.02454	2235	77.4649	35.6288	0.100453	7.98	55.3467	-0.0427518	-0.191246	0.140216	27	22
Valdemolino	Low	4	V_W_04	2.50333	9.02454	2235	77.4649	35.6288	0.100453	7.98	55.3467	-0.0427518	-0.191246	0.140216	43.9	55
Valdemolino	Low	5	V_W_05	2.50333	9.02454	2235	77.4649	35.6288	0.100453	7.98	55.3467	-0.0427518	-0.191246	0.140216	22.4	25
Valdemolino	Low	6	V_W_06	2.50333	9.02454	2235	77.4649	35.6288	0.100453	7.98	55.3467	-0.0427518	-0.191246	0.140216	28.5	35
Valdemolino	Low	7	V_W_07	2.50333	9.02454	2235	77.4649	35.6288	0.100453	7.98	55.3467	-0.0427518	-0.191246	0.140216	27.8	15
Valdemolino	Low	8	V_W_08	2.50333	9.02454	2235	77.4649	35.6288	0.100453	7.98	55.3467	-0.0427518	-0.191246	0.140216	18.5	30
Valdemolino	Low	9	V_W_09	2.50333	9.02454	2235	77.4649	35.6288	0.100453	7.98	55.3467	-0.0427518	-0.191246	0.140216	51.9	50
Valdemolino	Low	10	V_W_10	2.50333	9.02454	2235	77.4649	35.6288	0.100453	7.98	55.3467	-0.0427518	-0.191246	0.140216	25.2	57
Valdemolino	Low	11	V_W_11	2.50333	9.02454	2235	77.4649	35.6288	0.100453	7.98	55.3467	-0.0427518	-0.191246	0.140216	18.8	28
Valdemolino	Low	12	V_W_12	2.50333	9.02454	2235	77.4649	35.6288	0.100453	7.98	55.3467	-0.0427518	-0.191246	0.140216	22.5	43
Valdemolino	Low	13	V_W_13	2.50333	9.02454	2235	77.4649	35.6288	0.100453	7.98	55.3467	-0.0427518	-0.191246	0.140216	28.3	38
Valdemolino	Low	14	V_W_14	2.50333	9.02454	2235	77.4649	35.6288	0.100453	7.98	55.3467	-0.0427518	-0.191246	0.140216	13.2	37
Valdemolino	Low	15	V_W_15	2.50333	9.02454	2235	77.4649	35.6288	0.100453	7.98	55.3467	-0.0427518	-0.191246	0.140216	24.4	43
Valdemolino	Low	16	V_W_16	2.50333	9.02454	2235	77.4649	35.6288	0.100453	7.98	55.3467	-0.0427518	-0.191246	0.140216	19.3	28
Valdemolino	Low	17	V_W_17	2.50333	9.02454	2235	77.4649	35.6288	0.100453	7.98	55.3467	-0.0427518	-0.191246	0.140216	102.3	112
Valdemolino	Low	18	V_W_18	2.50333	9.02454	2235	77.4649	35.6288	0.100453	7.98	55.3467	-0.0427518	-0.191246	0.140216	56.3	44
Valdemolino	Low	19	V_W_19	2.50333	9.02454	2235	77.4649	35.6288	0.100453	7.98	55.3467	-0.0427518	-0.191246	0.140216	41	44
Valdemolino	Low	20	V_W_20	2.50333	9.02454	2235	77.4649	35.6288	0.100453	7.98	55.3467	-0.0427518	-0.191246	0.140216	41.3	36
Valdemolino	Low	21	V_W_21	2.50333	9.02454	2235	77.4649	35.6288	0.100453	7.98	55.3467	-0.0427518	-0.191246	0.140216	33	70
Valdemolino	Low	22	V_W_22	2.50333	9.02454	2235	77.4649	35.6288	0.100453	7.98	55.3467	-0.0427518	-0.191246	0.140216	15.1	65
Valdemolino	Low	23	V_W_23	2.50333	9.02454	2235	77.4649	35.6288	0.100453	7.98	55.3467	-0.0427518	-0.191246	0.140216	33.7	30
Valdemolino	Low	24	V_W_24	2.50333	9.02454	2235	77.4649	35.6288	0.100453	7.98	55.3467	-0.0427518	-0.191246	0.140216	25.3	14
Valdemolino	Low	25	V_W_25	2.50333	9.02454	2235	77.4649	35.6288	0.100453	7.98	55.3467	-0.0427518	-0.191246	0.140216	21.5	25
Valdemolino	Low	26	V_W_26	2.50333	9.02454	2235	77.4649	35.6288	0.100453	7.98	55.3467	-0.0427518	-0.191246	0.140216	27.5	18
Valdemolino	Low	27	V_W_27	2.50333	9.02454	2235	77.4649	35.6288	0.100453	7.98	55.3467	-0.0427518	-0.191246	0.140216	49.9	48
Valdemolino	Low	28	V_W_28	2.50333	9.02454	2235	77.4649	35.6288	0.100453	7.98	55.3467	-0.0427518	-0.191246	0.140216	26.2	71
Valdemolino	Low	29	V_W_29	2.50333	9.02454	2235	77.4649	35.6288	0.100453	7.98	55.3467	-0.0427518	-0.191246	0.140216	84.6	72
Valdemolino	Low	30	V_W_30	2.50333	9.02454	2235	77.4649	35.6288	0.100453	7.98	55.3467	-0.0427518	-0.191246	0.140216	17.5	32
Valdemolino	Low	31	V_W_31	2.50333	9.02454	2235	77.4649	35.6288	0.100453	7.98	55.3467	-0.0427518	-0.191246	0.140216	58.4	59
Valdemolino	Low	32	V_W_32	2.50333	9.02454	2235	77.4649	35.6288	0.100453	7.98	55.3467	-0.0427518	-0.191246	0.140216	26.5	21
Valdemolino	Low	33	V_W_33	2.50333	9.02454	2235	77.4649	35.6288	0.100453	7.98	55.3467	-0.0427518	-0.191246	0.140216	16.4	47
Valdemolino	Low	34	V_W_34	2.50333	9.02454	2235	77.4649	35.6288	0.100453	7.98	55.3467	-0.0427518	-0.191246	0.140216	22.4	45
Valdemolino	Low	35	V_W_35	2.50333	9.02454	2235	77.4649	35.6288	0.100453	7.98	55.3467	-0.0427518	-0.191246	0.140216	21.6	32

## Sheet: Leps et al. 2011
	Functional diversity
	Abs	Grazing (F-ratio)				Residuals				Total
		Turnover	Intraspecific	Covariation	Total specific	Turnover	Intraspecific	Covariation	Total specific	Turnover	Intraspecific	Covariation	Total specific
	C	0.22367	0.029	0.09158	0.34425	1.53108	3.5739	-2.42826	2.67672	1.75475	3.6029	-2.33668	3.02097
	N	0.17972	0.02135	0.06093	0.262	2.63195	0.78004	-0.48959	2.9224	2.81167	0.8014	-0.42857	3.1845
	S	0.08859	0.013	-0.05259	0.049	2.71255	1.1463	-1.17885	2.68	2.80113	1.1593	-1.23143	2.729
	%	Grazing (F-ratio)				Residuals				Total
		Turnover	Intraspecific	Covariation	Total specific	Turnover	Intraspecific	Covariation	Total specific	Turnover	Intraspecific	Covariation	Total specific
	C	7.40391	0.959957	3.03148	11.3953	50.6817	118.303	-80.3801	88.6047	58.0856	119.263	-77.3487	100
	N	5.64359	0.670435	1.91333	8.22735	82.6488	24.4949	-15.3742	91.7695	88.2924	25.1656	-13.458	100
	S	3.24624	0.476365	-1.92708	1.79553	99.3972	42.0044	-43.1971	98.2045	102.643	42.4808	-45.1239	100
		Grazing (F-ratio)
		Turn+intra	Spec
	C	8.36387	11.3953
	N	6.31402	8.22735
	S	3.72261	1.79553
	CWM
	Abs	Grazing (F-ratio)				Residuals				Total
		Turnover	Intraspecific	Covariation	Total specific	Turnover	Intraspecific	Covariation	Total specific	Turnover	Intraspecific	Covariation	Total specific
	C	38.62	408.37	-251.13	195.86	2562.66	2218.77	-3261.81	1519.62	2601.28	2627.14	-3512.94	1715.48
	N	1.2934	2.5642	1.2737	5.1313	12.3123	3.8309	-2.84	13.3032	13.6057	6.395	-1.5662	18.4345
	S	4.769	10.501	-2.392	12.878	61.72	10.884	-5.233	67.371	66.489	21.385	-7.625	80.249
	%	Grazing (F-ratio)				Residuals				Total
		Turnover	Intraspecific	Covariation	Total specific	Turnover	Intraspecific	Covariation	Total specific	Turnover	Intraspecific	Covariation	Total specific
	C	2.25126	23.805	-14.6391	11.4172	149.384	129.338	-190.14	88.5828	151.636	153.143	-204.779	100
	N	7.01619	13.9098	6.90933	27.8353	66.7894	20.7811	-15.4059	72.1647	73.8056	34.6904	-8.49603	100
	S	5.94275	13.0855	-2.98072	16.0476	76.9106	13.5628	-6.52095	83.9524	82.8534	26.6483	-9.50168	100
		Grazing (F-ratio)
		Turn+intra	Spec
	C	26.0563	11.4172
	N	20.926	27.8353
	S	19.0283	16.0476

## Sheet: data_Leps
value	variable	spec	trait	indices
2.25126	turnover	11.4172	C	Community-weighted mean
7.01619	turnover	27.8353	N	Community-weighted mean
5.94275	turnover	16.0476	S	Community-weighted mean
7.40391	turnover	11.3953	C	Functional diversity
5.64359	turnover	8.22735	N	Functional diversity
3.24624	turnover	1.79553	S	Functional diversity
23.805	itv		C	Community-weighted mean
13.9098	itv		N	Community-weighted mean
13.0855	itv		S	Community-weighted mean
0.959957	itv		C	Functional diversity
0.670435	itv		N	Functional diversity
0.476365	itv		S	Functional diversity
