# Supplementary material for: When disturbances favour species adapted to stressful soils: grazing may benefit soil specialists in gypsum plant communities
Source: PeerJ journal article supplement (doi:10.7717/peerj.14222), 2022-10-12
Supplement: supp_files_ACera.doc [file supp_files_ACera.doc]

SUPPLEMENTARY INFORMATION

**Disturbances favour species adapted to stressful soils: livestock grazing may benefit soil specialists in gypsum plant communities**

Andreu Cera 1,2, Gabriel Montserrat-Martí3, Arantzazu L. Luzuriaga4, Yolanda Pueyo3, Sara Palacio1

Table S1. Percentage cover and standard error per grazing intensity in each locality for soil features

|  |  |  |  |  |  |  |  |  |  |
| --- | --- | --- | --- | --- | --- | --- | --- | --- | --- |
| Locality | Grazing intensity | Gypsum (%) | pH | Conductivity (µm/s) | N (mg/g) | C (mg/g) | Clay (%) | Lime (%) | Sand(%) |
|  |  |  |  |  |  |  |  |  |  |
| Corral del Hoyo | |  |  |  |  |  |  |  |  |
|  |  |  |  |  |  |  |  |  |  |
|  | High | 83.39±6.71 | 7.94±0.10 | 2231.67±28.75 | 0.86±0.26 | 25.70±3.22 | 7.70±2.04 | 34.82±2.87 | 57.48±2.68 |
|  | Medium | 68.83±31.99 | 5.64±4.06 | 2232.00±97.25 | 1.16±0.46 | 19.97±9.36 | 8.38±2.85 | 31.03±7.41 | 60.59±9.61 |
|  | Low | 56.06±20.68 | 8.01±0.03 | 2286.00±47.32 | 0.95±0.10 | 26.30±3.47 | 11.44±2.69 | 35.35±4.85 | 53.21±7.49 |
|  |  |  |  |  |  |  |  |  |  |
| Pedriza | |  |  |  |  |  |  |  |  |
|  |  |  |  |  |  |  |  |  |  |
|  | High | 64.25±15.55 | 8.02±0.07 | 2276.00±20.78 | 0.86±0.22 | 17.93±3.99 | 8.09±2.25 | 32.81±5.39 | 59.10±6.55 |
|  | Medium | 87.77±22.58 | 8.01±0.05 | 2231.33±64.24 | 0.76±0.27 | 12.68±5.53 | 11.19±5.72 | 36.50±7.32 | 52.31±12.95 |
|  | Low | 80.60±2.42 | 8.03±0.06 | 2239.33±10.07 | 0.71±0.23 | 20.40±4.16 | 9.65±1.65 | 35.10±2.41 | 55.24±3.87 |
|  |  |  |  |  |  |  |  |  |  |
| Valdemolino | |  |  |  |  |  |  |  |  |
|  |  |  |  |  |  |  |  |  |  |
|  | High | 83.71±8.44 | 8.06±0.06 | 2357.33±176.53 | 0.70±0.27 | 11.17±4.64 | 7.12±0.65 | 32.94±3.61 | 59.94±4.25 |
|  | Medium | 73.55±22.48 | 8.00±0.02 | 2274.67±56.62 | 0.64±0.07 | 28.37±12.19 | 11.86±4.64 | 38.11±6.69 | 50.04±10.95 |
|  | Low | 77.46±9.66 | 7.98±0.05 | 2235.00±46.57 | 1.00±0.27 | 25.03±6.90 | 9.02±1.85 | 35.63±2.19 | 55.35±3.85 |
|  |  |  |  |  |  |  |  |  |  |

Table S2: Perennial species included in the study with indication of their life form and gypsophily value (GV) according to (Mota et al., 2011). Gypsophily value range from 2 (generalist species) to 5 (the highest affinity to gypsum soils, specialist species).

|  |  |  |  |  |  |  |  |
| --- | --- | --- | --- | --- | --- | --- | --- |
| Species |  | Family |  | Life form |  | GV |  |
|  |  |  |  |  |  |  |  |
| *Allium sphaerocephalon* L. |  | Amaryllidaceae |  | Geophyte |  | 2 |  |
| *Artemisia herba-alba* Asso |  | Asteraceae |  | Chamaephyte |  | 2 |  |
| *Asperula aristata* L.f. |  | Rubiaceae |  | Hemicryptophyte |  | 2 |  |
| *Asphodelus fistulosus* L. |  | Asphodelaceae |  | Geophyte |  | 2 |  |
| *Astragalus alopecuroides* L. |  | Fabaceae |  | Hemicryptophyte |  | 2 |  |
| *Astragalus incanus* L. |  | Fabaceae |  | Hemicryptophyte |  | 2 |  |
| *Astragalus monspessulanus* L. |  | Fabaceae |  | Hemicryptophyte |  | 2 |  |
| *Atractylis humilis* L. |  | Asteraceae |  | Chamaephyte |  | 2 |  |
| *Brachypodium retusum* (Pers.) P.Beauv. |  | Poaceae |  | Chamaephyte |  | 2 |  |
| *Bromus erectus* Huds. |  | Poaceae |  | Hemicryptophyte |  | 2 |  |
| *Carduus tenuiflorus* Curtis |  | Asteraceae |  | Hemicryptophyte |  | 2 |  |
| *Caroxylon vermiculatum* (L.) Akhani & Roalson |  | Amaranthaceae |  | Chamaephyte |  | 2 |  |
| *Centaurea aspera* L. |  | Asteraceae |  | Chamaephyte |  | 2 |  |
| *Convolvulus arvensis* L. |  | Convolvulaceae |  | Hemicryptophyte |  | 2 |  |
| *Coris monspeliensis* L. |  | Primulaceae |  | Chamaephyte |  | 2 |  |
| *Crepis vesicaria subsp. taraxacifolia* (Thuill.) Thell. |  | Asteraceae |  | Hemicryptophyte |  | 2 |  |
| *Dactylis glomerata subsp. hispanica* (Roth) Nyman |  | Poaceae |  | Hemicryptophyte |  | 2 |  |
| *Dipcadi serotinum* (L.) Medik. |  | Asparagaceae |  | Geophyte |  | 2 |  |
| *Echinops ritro* L. |  | Asteraceae |  | Hemicryptophyte |  | 2 |  |
| *Genista scorpius* (L.) DC |  | Fabaceae |  | Chamaephyte |  | 2 |  |
| *Gypsophila struthium subsp. hispanica* (Willk.) G.López |  | Caryophyllaceae |  | Chamaephyte |  | 4.69 |  |
| *Hedysarum boveanum subsp. europaeum* Guitt. & Kerguélen |  | Fabaceae |  | Chamaephyte |  | 2 |  |
| *Helianthemum marifolium* (L.) Mill. |  | Cistaceae |  | Chamaephyte |  | 2 |  |
| *Helianthemum squamatum* (L.) Dum.Cours. |  | Cistaceae |  | Chamaephyte |  | 4.87 |  |
| *Helianthemum syriacum* (Jacq.) Dum.Cours. |  | Cistaceae |  | Chamaephyte |  | 2 |  |
| *Helianthemum violaceum* (Cav.) Pers*.* |  | Cistaceae |  | Chamaephyte |  | 2 |  |
| *Helichrysum stoechas* (L.) Moench |  | Asteraceae |  | Chamaephyte |  | 2 |  |
| *Helictochloa bromoides* (Gouan) Romero Zarco |  | Poaceae |  | Hemicryptophyte |  | 2 |  |
| *Herniaria fruticosa* L. |  | Caryophyllaceae |  | Chamaephyte |  | 4.05 |  |
| *Koeleria vallesiana* (Honck.) Gaudin |  | Poaceae |  | Hemicryptophyte |  | 2 |  |
| *Launaea fragilis* (Asso) Pau |  | Asteraceae |  | Chamaephyte |  | 3.1 |  |
| *Launaea pumila* (Cav.) Kuntze |  | Asteraceae |  | Hemicryptophyte |  | 3.22 |  |
| *Linum suffruticosum* L. |  | Linaceae |  | Chamaephyte |  | 2 |  |
| *Lygeum spartum* Loefl. ex L. |  | Poaceae |  | Hemicrytophyte |  | 2 |  |
| *Matthiola fruticulosa* (L.) Maire |  | Brassicaceae |  | Chamaephyte |  | 2 |  |
| *Ononis tridentata* L. |  | Fabaceae |  | Chamaephyte |  | 4.43 |  |
| *Onopordum nervosum* Boiss. Cf |  | Asteraceae |  | Hemicrytophyte |  | 2 |  |
| *Orobanche cernua* Loefl. |  | Orobanchaceae |  | Geophyte |  | 2 |  |
| *Petrosedum sediforme* (Jacq.) Grulich |  | Crassulaceae |  | Chamaephyte |  | 2 |  |
| *Plantago albicans* L. |  | Plantaginaceae |  | Chamaephyte |  | 2 |  |
| *Poa bulbosa* L. |  | Poaceae |  | Hemicryptophyte |  | 2 |  |
| *Polygala rupestris* Pourr. |  | Polygalaceae |  | Chamaephyte |  | 2 |  |
| *Reseda stricta Pers.* |  | Resedaceae |  | Hemicryptophyte |  | 3.97 |  |
| *Rosmarinus officinalis* L. |  | Lamiaceae |  | Chamaephyte |  | 2 |  |
| *Sideritis fruticulosa Pourr.* |  | Lamiaceae |  | Chamaephyte |  | 2 |  |
| *Sonchus tenerrimus* L. |  | Asteraceae |  | Chamaephyte |  | 2 |  |
| *Stipa barbata* Desf. |  | Poaceae |  | Hemicryptophyte |  | 2 |  |
| *Stipa lagascae* Roem. & Schult. |  | Poaceae |  | Hemicryptophyte |  | 2 |  |
| *Stipellula parviflora* (Desf.) Röser & Hamasha |  | Poaceae |  | Hemicryptophyte |  | 2 |  |
| *Teucrium capitatum* L. |  | Lamiaceae |  | Chamaephyte |  | 2 |  |
| *Thymus vulgaris* L. |  | Lamiaceae |  | Chamaephyte |  | 2 |  |
| *Thymus zygis* L. |  | Lamiaceae |  | Chamaephyte |  | 2 |  |
|  |  |  |  |  |  |  |  |

Table S3: Coordinates in NMDS of environmental variables showing the effect of different soil features on gypsum plant communities. R-square coefficients and their p-values are also shown.

|  |  |  |  |  |  |  |  |  |
| --- | --- | --- | --- | --- | --- | --- | --- | --- |
|  |  | NMDS1 |  | NMDS2 |  | R2 |  | P-value |
|  |  |  |  |  |  |  |  |  |
| C |  | -0.99093 |  | -0.13441 |  | 0.4105 |  | 0.001 |
| Clay |  | -0.71362 |  | -0.70053 |  | 0.0602 |  | 0.001 |
| Conductivity |  | -0.18529 |  | 0.98268 |  | 0.1007 |  | 0.001 |
| Gypsum |  | 0.69215 |  | -0.72175 |  | 0.2490 |  | 0.001 |
| Lime |  | -0.46532 |  | -0.88514 |  | 0.0911 |  | 0.001 |
| N |  | -0.76512 |  | 0.64388 |  | 0.0944 |  | 0.001 |
| pH |  | 0.86200 |  | 0.50691 |  | 0.0820 |  | 0.001 |
| Sand |  | 0.56512 |  | 0.82501 |  | 0.0845 |  | 0.001 |
|  |  |  |  |  |  |  |  |  |

Table S4. Means and standard errors of functional trait values of each species for each grazing intensity from a subset of 14 species in Valdemolino.

|  |  |  |  |  |
| --- | --- | --- | --- | --- |
| Species | Grazing intensity | Leaf C (mg/g) | Leaf N (mg/g) | Leaf S (mg/g) |
|  |  |  |  |  |
| *Brachypodium retusum* | High | 428.84±1.38 | 16.19±0.29 | 4.82±0.31 |
| Medium | 450.08±2.27 | 16.41±0.52 | 4.49±0.12 |
| Low | 442.78±2.56 | 14.02±0.60 | 3.91±0.34 |
| *Genista scorpius* | High | 470.73±3.88 | 27.64±1.37 | 2.59±0.39 |
| Medium | 467.06±2.38 | 32.60±2.32 | 3.15±0.66 |
| Low | 471.16±3.46 | 30.84±1.00 | 2.79±0.16 |
| *Gypsophila struthium* | High | 338.73±6.06 | 23.88±0.64 | 13.65±1.53 |
| Medium | 349.42±5.01 | 26.31±1.26 | 14.90±2.64 |
| Low | 386.50±17.28 | 26.42±2.01 | 10.68±2.47 |
| *Helianthemum squamatum* | High | 396.17±2.76 | 18.79±1.04 | 28.01±1.79 |
| Medium | 403.18±2.77 | 17.66±0.94 | 24.05±0.27 |
| Low | 363.66±15.67 | 17.57±1.11 | 21.03±4.66 |
| *Helichrysum stoechas* | High | 436.83±8.10 | 21.12±0.31 | 6.20±0.14 |
| Medium | 450.58±1.31 | 17.65±0.75 | 4.67±0.99 |
| Low | 466.30±4.24 | 16.70±0.85 | 3.58±0.36 |
| *Helianthemum syriacum* | High | 436.30±2.62 | 19.67±0.73 | 9.41±0.49 |
| Medium | 437.50±4.07 | 19.24±1.09 | 9.01±1.07 |
| Low | 432.14±1.67 | 15.19±0.56 | 7.37±0.84 |
| *Helianthemum violaceum* | High | 453.67±10.29 | 21.54±0.21 | 3.44±0.21 |
| Medium | 451.04±1.76 | 23.66±0.88 | 3.00±0.06 |
| Low | 453.06±2.61 | 22.98±0.95 | 3.04±0.07 |
| *Herniaria fruticosa* | High | 424.14±3.65 | 27.06±0.55 | 8.49±1.04 |
| Medium | 419.04±2.37 | 20.69±0.74 | 7.63±1.04 |
| Low | 440.24±1.61 | 18.68±0.88 | 6.18±0.38 |
| *Koelleria vallesiana* | High | 426.30±4.47 | 19.12±0.35 | 3.98±0.26 |
| Medium | 434.48±2.66 | 18.58±1.03 | 3.52±0.19 |
| Low | 430.94±1.95 | 16.67±0.64 | 2.77±0.18 |
| *Linum suffruticosum* | High | 423.00±4.76 | 32.09±0.94 | 3.73±0.13 |
| Medium | 431.30±2.41 | 25.86±0.87 | 2.95±0.09 |
| Low | 427.40±3.26 | 30.20±1.98 | 3.17±0.22 |
| *Ononis tridentata* | High | 317.53±7.31 | 24.97±0.55 | 50.67±3.06 |
| Medium | 337.74±9.24 | 25.46±0.44 | 47.05±4.48 |
| Low | 347.56±3.04 | 25.63±1.50 | 32.78±2.29 |
| *Sideritis fruticulosa* | High | 439.13±1.85 | 30.61±0.88 | 3.14±0.19 |
| Medium | 438.64±5.58 | 29.42±1.47 | 3.04±0.09 |
| Low | 429.10±2.88 | 26.22±0.64 | 2.41±0.07 |
| *Teucrium captitatum* | High | 492.10±1.90 | 27.59±1.00 | 4.90±0.37 |
| Medium | 509.54±3.21 | 27.17±1.91 | 3.79±0.27 |
| Low | 506.62±2.42 | 22.72±0.66 | 3.68±0.21 |
| *Thymus vulgaris* | High | 481.90±6.45 | 21.48±1.10 | 3.43±0.53 |
| Medium | 494.98±2.44 | 18.56±0.49 | 3.54±0.28 |
| Low | 504.84±3.07 | 18.47±0.57 | 3.28±0.19 |
|  |  |  |  |  |

|  |  | | |  |  | | | |  | |  | | |
| --- | --- | --- | --- | --- | --- | --- | --- | --- | --- | --- | --- | --- | --- |
|  | Fixed average | | |  | Intraspecific variability | | | |  | | Specific average | | |
|  | Low | Medium | High |  | Low | Medium | High |  | | Low | | Medium | High |
|  |  |  |  |  |  |  |  |  | |  | |  |  |
| ***CWM*** |  |  |  |  |  |  |  |  | |  | |  |  |
|  |  |  |  |  |  |  |  |  | |  | |  |  |
| Leaf C (mg/g) | 403.83±3.90 | 409.40±1.86 | 412.27±2.19 |  | 26.75±4.14 | 9.04±1.02 | -0.76±1.48 |  | | 430.59±2.16 | | 418.44±2.08 | 411.51±2.22 |
| Leaf N (mg/g) | 21.57±0.21 | 20.57±0.19 | 22.12±0.19 |  | -1.08±0.14 | 0.02±0.04 | 1.13±0.11 |  | | 20.48±0.24 | | 20.59±0.20 | 23.24±0.16 |
| Leaf S (mg/g) | 11.99±0.43 | 13.49±0.48 | 10.48±0.39 |  | -3.50±0.28 | -0.05±0.09 | 0.69±0.12 |  | | 8.49±0.36 | | 13.44±0.52 | 11.17±0.46 |
|  |  |  |  |  |  |  |  |  | |  | |  |  |
| ***FD*** |  |  |  |  |  |  |  |  | |  | |  |  |
|  |  |  |  |  |  |  |  |  | |  | |  |  |
| Leaf C | 0.14±0.01 | 0.08±0.00 | 0.09±0.00 |  | 0.12±0.01 | 0.10±0.01 | 0.13±0.01 |  | | 0.27±0.01 | | 0.19±0.01 | 0.22±0.01 |
| Leaf N | 0.28±0.01 | 0.23±0.01 | 0.28±0.01 |  | -0.02±0.01 | -0.02±0.00 | -0.01±0.00 |  | | 0.26±0.01 | | 0.21±0.01 | 0.28±0.01 |
| Leaf S | 0.22±0.01 | 0.21±0.01 | 0.18±0.01 |  | -0.04±0.01 | -0.02±0.00 | -0.02±0.00 |  | | 0.19±0.01 | | 0.19±0.01 | 0.16±0.01 |
|  |  |  |  |  |  |  |  |  | |  | |  |  |

Table S5. Means and standard errors of CWM and FD values. Indices of canopy and leaf traits obtained from a single value per species (Fixed average), a value of each level of grazing per species (Specific average) and differences between specific and fixed averages (Intraspecific)
